# Supplementary material for: Pyridine-N-oxide catalyzed acylative desymmetrization of bisphenols: access to P-stereogenic phosphinates with low catalyst loadings
Source: Royal Society of Chemistry journal article supplement (doi:10.1039/d3qo01499a), 2023-01-01
Supplement: d3qo01499a1.pdf [file d3qo01499a1.pdf]

# Pyridine-*N*-oxide Catalyzed Acylative Desymmetrization of Bisphenols: Access to P-Stereogenic Phosphinates with Low Catalyst Loadings

Yang-Guang Chen,<sup>a</sup> Ying Hu,<sup>b</sup> Jia-Yi Liu,<sup>b</sup> Ming-Sheng Xie,<sup>b,\*</sup> and Hai-Ming  
Guo<sup>a,b,\*</sup>

<sup>a</sup>School of Environment, Henan Normal University, Xinxiang, Henan 453007, China

<sup>b</sup>State Key Laboratory of Antiviral Drugs, Pingyuan Laboratory, Key Laboratory of Green Chemical Media and Reactions, Ministry of Education, Collaborative Innovation Center of Henan Province for Green Manufacturing of Fine Chemicals, School of Chemistry and Chemical Engineering, Henan Normal University, Xinxiang, Henan 453007, China.

E-mail: xiemingsheng@htu.edu.cn; ghm@htu.edu.cn

## Contents

|                                                       |         |
|-------------------------------------------------------|---------|
| 1. General information.....                           | S2-S2   |
| 2. Substrates synthesis.....                          | S3-S3   |
| 3. Optimization study.....                            | S4-S4   |
| 4. General procedure for the catalytic reactions..... | S5-S21  |
| 5. Late-stage functionalization of drugs.....         | S22-S24 |
| 6. X-ray data of <b>3aa</b> .....                     | S25-S25 |
| 7. HRMS analysis.....                                 | S26-S26 |
| 8. NMR Spectra .....                                  | S27-S67 |
| 9. HPLC Spectra.....                                  | S68-S92 |
| 10. Reference.....                                    | S93-S93 |

## General information

<sup>1</sup>H NMR spectra were recorded on Bruker Avance III HD 600 or Avance 400 MHz spectrometer. Chemical shifts are recorded in ppm relative to tetramethylsilane and with the solvent resonance as the internal standard. Data are reported as follows: chemical shift, multiplicity (s = singlet, d = doublet; t = triplet; q = quartet; dd = doublet of doublets; sept = septet; m = multiplet; br = broad and etc), coupling constants (Hz), integration. <sup>13</sup>C NMR data were collected on Bruker Avance III HD 150 or Avance 100 MHz spectrometer. Chemical shifts are reported in ppm from the tetramethylsilane with the solvent resonance as internal standard. Enantiomer excesses were determined by chiral HPLC analysis on Chiralcel AS/ADH/IA/IC in comparison with the authentic racemates. Chiral HPLC analysis recorded on Thermo scientific Dionex Ultimate 3000 and Agilent Technologies 1260 Infinity. Optical rotations were reported as follows:  $[\alpha]_D^{25}$  (c: g/100 mL, in solvent). Optical rotations recorded on Autopol Automatic Polarimeter. HRMS was recorded on an ABI/Sciex QStar Mass Spectrometer (ESI). CH<sub>2</sub>Cl<sub>2</sub> and THF were purchased extra dry solvents. Other solvents used for work-up and purification purposes were purchased in technical grade quality and distilled by rotary evaporator before use. Single crystal X-ray crystallography data were obtained on Supernova Atlas S2 CCD detector. The chiral 3-substituted PPY-*N*-oxide catalysts **C1a** were prepared according to literature precedebts.<sup>[1]</sup> Chiral 4-aryl-pyridine-*N*-oxides **C2a-C2l**, **C3d** were prepared by literature precedents.<sup>[2]</sup>

## Substrate synthesis.

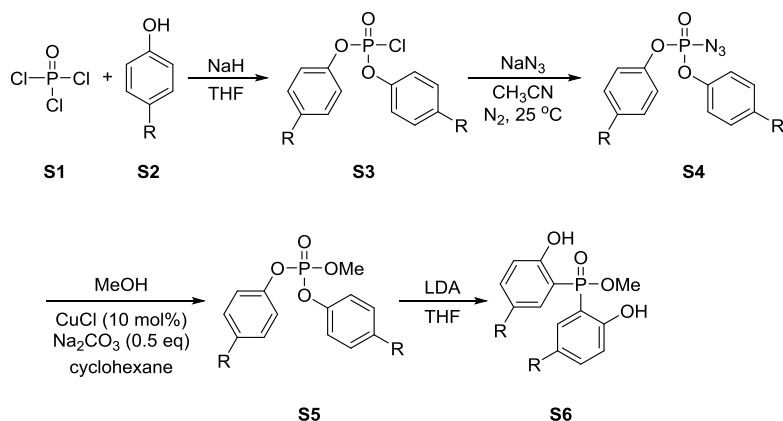

**General procedure A** To a dry round bottomed flask equipped with a magnetic stir bar, added Phenols **S2** (1 equiv) in THF, then NaH (1.2 equiv) was added with nitrogen. The reaction was stirring at 0 °C for 30 minutes. When the reaction completed, phosphoryl trichloride **S1** (0.5 equiv) was added to the mixture at 0 °C for 1 h with nitrogen, and then 24 h at room temperature. Extracted with CHCl<sub>3</sub> and the organic phase was dried over MgSO<sub>4</sub>. The resulting crude residue was purified via column chromatography on silica gel to afford the desired products diphenyl phosphorochloridate **S3**.

**General procedure B** An appropriate diphenyl phosphorochloridate **S3** (5.0 mmol) was added dropwise to a suspension of sodium azide (7.5 mmol, 1.5 equiv) in acetonitrile (10 mL) at 0 °C under argon. After stirring at 25 °C for 12 h, the reaction mixture was filtered, the solvent was removed under reduced pressure at 25 °C and the reaction mixture was diluted with EtOAc (20 mL). The organic layer was washed with water (2 x 5 mL), 5% Na<sub>2</sub>CO<sub>3</sub> (2 x 5 mL), water (5 mL) and brine (5 mL), dried over NaSO<sub>4</sub>. The solvent was removed under reduced pressure. The crude mixture was purified by silica gel column chromatography (PE/EtOAc = 10/1 to 5/1) to obtain the desired products **S4**.

**General procedure C** A flame-dried Schlenk tube equipped with a magnetic stir bar was successively charged with the diphenylphosphoryl azide **S4** (0.50 mmol, 1.0 equiv), aliphatic alcohol (0.2 mL), CuCl (0.05 mmol, 10 mol%) and Na<sub>2</sub>CO<sub>3</sub> (0.25 mmol, 0.5 equiv) in cyclohexane (1.8 mL). The reaction mixture was stirred at the indicated temperature and time. The reaction was monitored by TLC. After completion of the reaction, the reaction mixture was allowed to cool to room temperature and diluted with EtOAc (25 mL). The crude reaction mixture was washed with 1% HCl aq (5 mL) and H<sub>2</sub>O (5 mL). The organic phase was dried over anhydrous Na<sub>2</sub>SO<sub>4</sub> and concentrated under reduced pressure. The crude mixture was purified by silica gel column chromatography (PE/EtOAc = 15/1 to 5/1) to obtain the desired products **S5**.

**General procedure D** To a dry round bottomed flask equipped with a magnetic stir bar, added LDA (4.0 equiv) at -78 °C, **S5** (1.0 equiv) dissolved in pure and dry THF was added in 60 min at -78 °C. The resulting reaction mixture was stirred at -78 °C for another 60 min, then it was allowed to warm up to rt and it was stirred at rt for 12 h. After the reaction was completed, quenched with saturated aqueous NH<sub>4</sub>Cl solution, then extracted with CHCl<sub>3</sub>. The organic phase was separated and the combined organic phase was dried over MgSO<sub>4</sub>, filtered and the solvent was removed. The crude mixture was purified by silica gel column chromatography (PE/EtOAc = 10/1 to 4/1) to obtain the desired products **S6**.

## Optimization study

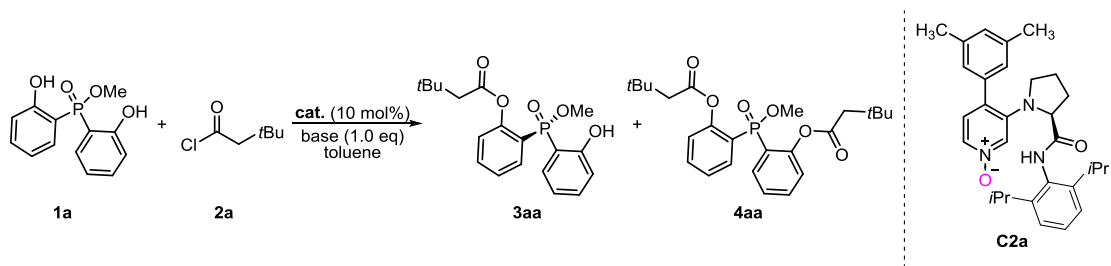

**Table S1.** Base screening

| entry <sup>a</sup> | base                            | <b>3aa:4aa</b> | yield (%)<br>( <b>3aa</b> ) <sup>b</sup> | ee (%) <sup>c</sup> |
|--------------------|---------------------------------|----------------|------------------------------------------|---------------------|
| 1                  | Et <sub>3</sub> N               | 1.4:1          | 54                                       | 91                  |
| 2                  | DIPEA                           | 1.4:1          | 54                                       | 90                  |
| 3                  | DBU                             | 1.7:1          | 54                                       | 87                  |
| 4                  | Na <sub>2</sub> CO <sub>3</sub> | 1.4:1          | 55                                       | 92                  |
| 5                  | K <sub>2</sub> CO <sub>3</sub>  | 1.4:1          | 48                                       | 90                  |
| 6                  | NaHCO <sub>3</sub>              | 1.4:1          | 52                                       | 89                  |

<sup>a</sup>Unless otherwise noted, the reaction conditions are as follows: **1a** (0.1 mmol), **2** (0.2 equiv), catalyst (10 mol%), and base (1.0 equiv) in toluene (1.0 mL) at 10 °C for 10 min. <sup>b</sup>Isolated yield.

<sup>c</sup>Determined by chiral HPLC analysis.

## General procedure for the catalytic reactions

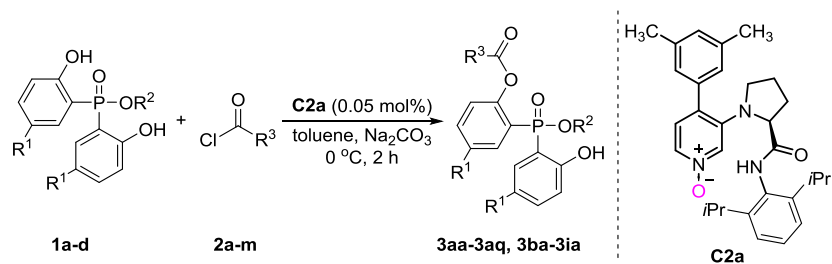

**General procedure E** Chiral ArPNO **C2a** (5 mg) was added in 5 mL toluene. In a dry test tube, chiral ArPNO **C2a** (24  $\mu$ L, 0.0005 mmol, 0.05 mol%), substrate **1** (0.1 mmol), Na<sub>2</sub>CO<sub>3</sub> (10.6 mg, 0.1 mmol, 1.0 eq) were added. Then, toluene (2.0 mL) and acyl chloride **2** (1.0 eq) were added and the reaction was stirred at 0 °C for 2 h. The test tube was sealed with a screw rubber stopper. Purification by flash column chromatography using gradient elution to give the title product **3**. The eluents were pure Pet and Pet/EtOAc, respectively.

**(S)-2-((2-Hydroxyphenyl)(methoxy)phosphoryl)phenyl 3,3-dimethylbutanoate (3aa)**

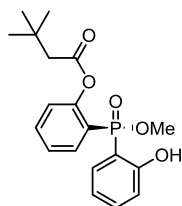

**Prepared according to general procedure E** using chiral ArPNO **C2a** (24  $\mu$ L, 0.005 mmol, 0.05 mol%), methyl bis(2-hydroxyphenyl)phosphinate **1a** (26.4 mg, 0.1 mmol),  $\text{Na}_2\text{CO}_3$  (10.6 mg, 0.1 mmol), were added in toluene (2 mL). Then, the 3,3-dimethylbutanoyl chloride **2a** (14.9  $\mu$ L, 0.1 mmol) was added in mixture at 0  $^\circ\text{C}$  for 2 h. Purification by flash column chromatography using gradient elution to give the title product **3aa** as a white solid (33.3 mg, 92% yield, 94% ee). The eluents were pure Pet and Pet/EtOAc (10/1, v/v), respectively.

$R_f$  = 0.51 (Pet/EtOAc, 2/1, v/v). m.p: 108.2-109.4  $^\circ\text{C}$ .

**HPLC** analysis: 94% ee (IA, 2-propanol/*n*-hexane = 20/80, flow rate = 0.6 mL/min;  $\lambda$  = 256 nm)  
 $t_R$  = 9.2 min (major), 10.9 min (minor).

$[\alpha]_D^{22} = -95.5$  ( $c$  0.47,  $\text{CHCl}_3$ ).

**$^1\text{H}$  NMR** (400 MHz,  $\text{CDCl}_3$ ):  $\delta$  10.96 (s, 1H), 7.94 (ddd,  $J$  = 12.4, 7.6, 1.6 Hz, 1H), 7.58 (t,  $J$  = 8.4 Hz, 1H), 7.41 (tt,  $J$  = 7.6, 1.6 Hz, 1H), 7.34 (tdd,  $J$  = 7.6, 2.8, 1.2 Hz, 1H), 7.18-7.15 (m, 1H), 7.07 (ddd,  $J$  = 14.8, 8.0, 2.0 Hz, 1H), 6.98-6.95 (m, 1H), 6.84-6.79 (m, 1H), 3.79 (d,  $J$  = 11.6 Hz, 3H), 2.46 (d,  $J$  = 14.4 Hz, 1H), 2.26 (d,  $J$  = 14.4 Hz, 1H), 1.05 (s, 9H).

**$^{13}\text{C}$  NMR** (100 MHz,  $\text{CDCl}_3$ ):  $\delta$  170.0, 163.3 (d,  $J_{C-P}$  = 5.0 Hz), 153.1 (d,  $J_{C-P}$  = 4.0 Hz), 135.2 (d,  $J_{C-P}$  = 2.0 Hz), 134.3 (d,  $J_{C-P}$  = 2.0 Hz), 133.0 (d,  $J_{C-P}$  = 5.0 Hz), 131.6 (d,  $J_{C-P}$  = 10.0 Hz), 125.7 (d,  $J_{C-P}$  = 11.0 Hz), 124.1 (d,  $J_{C-P}$  = 8.0 Hz), 123.1 (d,  $J_{C-P}$  = 146.0 Hz), 119.7 (d,  $J_{C-P}$  = 13.0 Hz), 118.0 (d,  $J_{C-P}$  = 9.0 Hz), 110.5 (d,  $J_{C-P}$  = 133.0 Hz), 51.8 (d,  $J_{C-P}$  = 6.0 Hz), 46.9, 30.9, 29.7.

**$^{31}\text{P}$  NMR** (162 MHz,  $\text{CDCl}_3$ ):  $\delta$  37.6.

**HRMS (ESI)**  $m/z$ :  $[\text{M}+\text{Na}]^+$  Calcd for  $\text{C}_{19}\text{H}_{23}\text{NaO}_5\text{P}^+$  385.1174, found 385.1169.

**(S)-2-((2-Hydroxyphenyl)(methoxy)phosphoryl)phenyl propionate (3ab)**

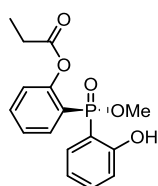

**Prepared according to general procedure E** using chiral ArPNO **C2a** (24  $\mu$ L, 0.005 mmol, 0.05 mol%), methyl bis(2-hydroxyphenyl)phosphinate **1a** (26.4 mg, 0.1 mmol),  $\text{Na}_2\text{CO}_3$  (10.6 mg, 0.1 mmol), were added in toluene (2 mL). Then, the propionyl chloride **2b** (8.7  $\mu$ L, 0.1 mmol) was added in mixture at 0  $^\circ\text{C}$  for 2 h. Purification by flash column chromatography using gradient elution to give the title product **3ab** as a white solid (29.8 mg, 93% yield, 91% ee). The eluents were pure Pet and Pet/EtOAc (10/1, v/v), respectively.

$R_f$  = 0.46 (Pet/EtOAc, 2/1, v/v). m.p: 110.0-111.4  $^\circ\text{C}$ .

**HPLC** analysis: 91% ee (IA, 2-propanol/*n*-hexane = 10/90, flow rate = 0.5 mL/min;  $\lambda$  = 256 nm)  
 $t_R$  = 21.9 min (major), 25.4 min (minor).

$[\alpha]_{\text{D}}^{22} = -104.3$  ( $c$  0.51,  $\text{CHCl}_3$ ).

$^1\text{H NMR}$  (400 MHz,  $\text{CDCl}_3$ ):  $\delta$  10.96 (s, 1H), 7.94 (ddd,  $J = 12.0, 7.6, 1.6$  Hz, 1H), 7.61-7.57 (m, 1H), 7.44-7.39 (m, 1H), 7.35 (ddd,  $J = 7.6, 2.8, 0.8$  Hz, 1H), 7.17 (ddd,  $J = 8.4, 5.6, 1.2$  Hz, 1H), 7.06 (ddd,  $J = 14.8, 8.0, 2.0$  Hz, 1H), 6.96 (ddd,  $J = 8.8, 5.6, 1.2$  Hz, 1H), 6.82 (tdd,  $J = 7.6, 3.2, 1.2$  Hz, 1H), 3.79 (d,  $J = 11.6$  Hz, 3H), 2.63-2.41 (m, 2H), 1.12 (t,  $J = 7.6$  Hz, 3H).

$^{13}\text{C NMR}$  (100 MHz,  $\text{CDCl}_3$ ):  $\delta$  172.3, 163.3 (d,  $J_{\text{C-P}} = 5.0$  Hz), 153.2, 135.2 (d,  $J_{\text{C-P}} = 2.0$  Hz), 134.4 (d,  $J_{\text{C-P}} = 2.0$  Hz), 132.9 (d,  $J_{\text{C-P}} = 5.0$  Hz), 131.7 (d,  $J_{\text{C-P}} = 10.0$  Hz), 125.8 (d,  $J_{\text{C-P}} = 12.0$  Hz), 124.2 (d,  $J_{\text{C-P}} = 9.0$  Hz), 123.8, 119.8 (d,  $J_{\text{C-P}} = 13.0$  Hz), 118.0 (d,  $J_{\text{C-P}} = 9.0$  Hz), 110.5 (d,  $J_{\text{C-P}} = 132.0$  Hz), 51.8 (d,  $J_{\text{C-P}} = 6.0$  Hz), 27.3, 8.8.

$^{31}\text{P NMR}$  (162 MHz,  $\text{CDCl}_3$ ):  $\delta$  49.0.

**HRMS (ESI)**  $m/z$ :  $[\text{M}+\text{Na}]^+$  Calcd for  $\text{C}_{16}\text{H}_{17}\text{NaO}_5\text{P}^+$  343.0706, found 343.0705.

### (S)-2-((2-Hydroxyphenyl)(methoxy)phosphoryl)phenyl isobutyrate (**3ac**)

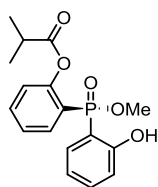

**Prepared according to general procedure E** using chiral ArPNO **C2a** (24  $\mu\text{L}$ , 0.005 mmol, 0.05 mol%), methyl bis(2-hydroxyphenyl)phosphinate **1a** (26.4 mg, 0.1 mmol),  $\text{Na}_2\text{CO}_3$  (10.6 mg, 0.1 mmol), were added in toluene (2 mL). Then, the isobutyryl chloride **2c** (10.5  $\mu\text{L}$ , 0.1 mmol) was added in mixture at 0  $^\circ\text{C}$  for 2 h. Purification by flash column chromatography using gradient elution to give the title product **3ac** as a white solid (31.7 mg, 95% yield, 94% ee). The eluents were pure Pet and Pet/EtOAc (10/1, v/v), respectively.

$R_f = 0.45$  (Pet/EtOAc, 2/1, v/v). m.p: 105.9-106.4  $^\circ\text{C}$ .

**HPLC** analysis: 94% ee (IA, 2-propanol/*n*-hexane = 20/80, flow rate = 0.6 mL/min;  $\lambda = 256$  nm)  $t_R = 8.9$  min (major), 10.4 min (minor).

$[\alpha]_{\text{D}}^{22} = -56.3$  ( $c$  0.45,  $\text{CHCl}_3$ ).

$^1\text{H NMR}$  (400 MHz,  $\text{CDCl}_3$ ):  $\delta$  10.92 (s, 1H), 7.93 (tdd,  $J = 12.4, 7.6, 1.6$  Hz, 1H), 7.61-7.57 (m, 1H), 7.43-7.39 (m, 1H), 7.34 (tdd,  $J = 7.6, 2.8, 0.8$  Hz, 1H), 7.15 (tdd,  $J = 8.0, 5.6, 0.8$  Hz, 1H), 7.08 (ddd,  $J = 14.8, 7.6, 2.0$  Hz, 1H), 6.96 (tdd,  $J = 8.4, 5.6, 1.2$  Hz, 1H), 6.85-6.80 (m, 1H), 3.78 (d,  $J = 11.6$  Hz, 3H), 2.82-2.72 (m, 1H), 1.28 (d,  $J = 7.2$  Hz, 3H), 1.12 (d,  $J = 7.2$  Hz, 3H).

$^{13}\text{C NMR}$  (150 MHz,  $\text{CDCl}_3$ ):  $\delta$  175.0, 163.3, 153.4 (d,  $J_{\text{C-P}} = 4.5$  Hz), 135.2, 134.4, 133.1 (d,  $J_{\text{C-P}} = 4.5$  Hz), 131.6 (d,  $J_{\text{C-P}} = 10.5$  Hz), 125.7 (d,  $J_{\text{C-P}} = 12.0$  Hz), 124.0 (d,  $J_{\text{C-P}} = 7.5$  Hz), 122.9 (d,  $J_{\text{C-P}} = 145.5$  Hz), 119.7 (d,  $J_{\text{C-P}} = 13.5$  Hz), 118.0 (d,  $J_{\text{C-P}} = 9.0$  Hz), 110.5 (d,  $J_{\text{C-P}} = 132.0$  Hz), 51.8 (d,  $J_{\text{C-P}} = 6.0$  Hz), 33.9, 19.0, 18.6.

$^{31}\text{P NMR}$  (162 MHz,  $\text{CDCl}_3$ ):  $\delta$  38.0.

**HRMS (ESI)**  $m/z$ :  $[\text{M}+\text{Na}]^+$  Calcd for  $\text{C}_{17}\text{H}_{19}\text{NaO}_5\text{P}^+$  357.0862, found 357.0859.

**(S)-2-((2-Hydroxyphenyl)(methoxy)phosphoryl)phenyl pivalate (3ad)**

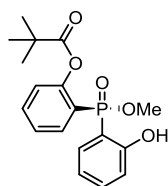

**Prepared according to general procedure E** using chiral ArPNO **C2a** (24  $\mu$ L, 0.005 mmol, 0.05 mol%), methyl bis(2-hydroxyphenyl)phosphinate **1a** (26.4 mg, 0.1 mmol),  $\text{Na}_2\text{CO}_3$  (10.6 mg, 0.1 mmol), were added in toluene (2 mL). Then, the pivaloyl chloride **2d** (12.3  $\mu$ L, 0.1 mmol) was added in mixture at 0  $^\circ\text{C}$  for 2 h. Purification by flash column chromatography using gradient elution to give the title product **3ad** as a white solid (32.4 mg, 93% yield, 91% ee). The eluents were pure Pet and Pet/EtOAc (10/1, v/v), respectively.

$R_f = 0.52$  (Pet/EtOAc, 2/1, v/v). m.p: 120.8-121.4  $^\circ\text{C}$ .

**HPLC** analysis: 91% ee (AS, 2-propanol/*n*-hexane = 20/80, flow rate = 0.8 mL/min;  $\lambda = 256$  nm)  $t_R = 16.1$  min (major), 9.2 min (minor).

$[\alpha]_D^{22} = -76.2$  ( $c$  0.41,  $\text{CHCl}_3$ ).

**$^1\text{H}$  NMR** (400 MHz,  $\text{CDCl}_3$ ):  $\delta$  10.82 (s, 1H), 7.86 (tdd,  $J = 12.8, 7.6, 1.6$  Hz, 1H), 7.60 (t,  $J = 8.0$  Hz 1H), 7.44-7.39 (m, 1H), 7.33 (tdd,  $J = 7.6, 2.8, 1.2$  Hz, 1H), 7.13-7.07 (m, 2H), 6.96 (tdd,  $J = 8.4, 5.6, 1.2$  Hz, 1H), 6.86-6.81 (m, 1H), 3.76 (d,  $J = 11.6$  Hz, 3H), 1.29 (s, 9H).

**$^{13}\text{C}$  NMR** (150 MHz,  $\text{CDCl}_3$ ):  $\delta$  176.7, 163.3 (d,  $J_{\text{C-P}} = 6.0$  Hz), 153.6 (d,  $J_{\text{C-P}} = 3.0$  Hz), 135.1, 134.5, 133.7 (d,  $J_{\text{C-P}} = 7.5$  Hz), 131.6 (d,  $J_{\text{C-P}} = 10.5$  Hz), 125.7 (d,  $J_{\text{C-P}} = 12.0$  Hz), 124.0 (d,  $J_{\text{C-P}} = 7.5$  Hz), 122.6 (d,  $J_{\text{C-P}} = 144.0$  Hz), 119.6 (d,  $J_{\text{C-P}} = 13.5$  Hz), 118.1 (d,  $J_{\text{C-P}} = 9.0$  Hz), 110.3 (d,  $J_{\text{C-P}} = 133.5$  Hz), 51.8 (d,  $J_{\text{C-P}} = 6.0$  Hz), 39.3, 27.1.

**$^{31}\text{P}$  NMR** (243 MHz,  $\text{CDCl}_3$ ):  $\delta$  33.4.

**HRMS (ESI)**  $m/z$ :  $[\text{M}+\text{Na}]^+$  Calcd for  $\text{C}_{18}\text{H}_{21}\text{NaO}_5\text{P}^+$  371.1019, found 371.1017.

**(S)-2-((2-Hydroxyphenyl)(methoxy)phosphoryl)phenyl 3-methylbutanoate (3ae)**

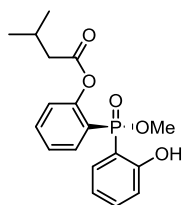

**Prepared according to general procedure E** using chiral ArPNO **C2a** (24  $\mu$ L, 0.005 mmol, 0.05 mol%), methyl bis(2-hydroxyphenyl)phosphinate **1a** (26.4 mg, 0.1 mmol),  $\text{Na}_2\text{CO}_3$  (10.6 mg, 0.1 mmol), were added in toluene (2 mL). Then, the 3-methylbutanoyl chloride **2e** (12.2  $\mu$ L, 0.1 mmol) was added in mixture at 0  $^\circ\text{C}$  for 2 h. Purification by flash column chromatography using gradient elution to give the title product **3ae** as a white solid (33.1 mg, 95% yield, 94% ee). The eluents were pure Pet and Pet/EtOAc (10/1, v/v), respectively.

$R_f = 0.54$  (Pet/EtOAc, 2/1, v/v). m.p: 106.9-107.4  $^\circ\text{C}$ .

**HPLC** analysis: 94% ee (IA, 2-propanol/*n*-hexane = 20/80, flow rate = 0.6 mL/min;  $\lambda = 256$  nm)  $t_R = 10.4$  min (major), 12.1 min (minor).



$[\alpha]_{\text{D}}^{22} = -123.3$  (*c* 0.54,  $\text{CHCl}_3$ ).

$^1\text{H NMR}$  (600 MHz,  $\text{CDCl}_3$ ):  $\delta$  10.94 (s, 1H), 7.94 (tdd,  $J = 12.6, 7.8, 1.8$  Hz, 1H), 7.58 (td,  $J = 8.4, 1.8$  Hz, 1H), 7.40 (t,  $J = 7.8$  Hz, 1H), 7.34 (td,  $J = 7.2, 2.4$  Hz, 1H), 7.16 (dd,  $J = 7.8, 5.4$  Hz, 1H), 7.07 (ddd,  $J = 15.0, 7.8, 1.8$  Hz, 1H), 6.96 (dd,  $J = 8.4, 5.4$  Hz, 1H), 6.82 (td,  $J = 7.2, 3.0$  Hz, 1H), 3.78 (d,  $J = 11.4$  Hz, 3H), 2.43 (dd,  $J = 16.2, 7.2$  Hz, 1H), 2.29 (dd,  $J = 15.6, 6.6$  Hz, 1H), 2.12-2.05 (m, 1H), 1.00 (d,  $J = 6.6$  Hz, 3H), 0.96 (d,  $J = 6.6$  Hz, 3H).

$^{13}\text{C NMR}$  (150 MHz,  $\text{CDCl}_3$ ):  $\delta$  170.8, 163.3 (d,  $J_{\text{C-P}} = 6.0$  Hz), 153.1 (d,  $J_{\text{C-P}} = 4.5$  Hz), 135.2, 134.3, 132.9 (d,  $J_{\text{C-P}} = 4.5$  Hz), 131.6 (d,  $J_{\text{C-P}} = 10.5$  Hz), 125.7 (d,  $J_{\text{C-P}} = 12.0$  Hz), 124.1 (d,  $J_{\text{C-P}} = 9.0$  Hz), 123.0 (d,  $J_{\text{C-P}} = 145.5$  Hz), 119.7 (d,  $J_{\text{C-P}} = 13.5$  Hz), 118.0 (d,  $J_{\text{C-P}} = 9.0$  Hz), 110.5 (d,  $J_{\text{C-P}} = 133.5$  Hz), 51.8 (d,  $J_{\text{C-P}} = 4.5$  Hz), 42.6, 25.4, 22.5.

$^{31}\text{P NMR}$  (243 MHz,  $\text{CDCl}_3$ ):  $\delta$  37.6.

**HRMS (ESI)** *m/z*:  $[\text{M}+\text{Na}]^+$  Calcd for  $\text{C}_{18}\text{H}_{21}\text{NaO}_5\text{P}^+$  371.1019, found 371.1016.

### (*S*)-2-((2-Hydroxyphenyl)(methoxy)phosphoryl)phenyl 2,2-dimethylbutanoate (**3af**)

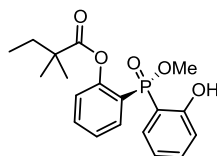

**Prepared according to general procedure E** using chiral ArPNO **C2a** (24  $\mu\text{L}$ , 0.005 mmol, 0.05 mol%), methyl bis(2-hydroxyphenyl)phosphinate **1a** (26.4 mg, 0.1 mmol),  $\text{Na}_2\text{CO}_3$  (10.6 mg, 0.1 mmol), were added in toluene (2 mL). Then, the 2,2-dimethylbutanoyl chloride **2f** (13.7  $\mu\text{L}$ , 0.1 mmol) was added in mixture at 0  $^\circ\text{C}$  for 2 h. Purification by flash column chromatography using gradient elution to give the title product **3af** as a yellow solid (32.2 mg, 89% yield, 91% ee). The eluents were pure Pet and Pet/EtOAc (10/1, v/v), respectively.

$R_f = 0.60$  (Pet/EtOAc, 2/1, v/v). m.p: 118.3-120.9  $^\circ\text{C}$ .

**HPLC** analysis: 91% ee (IA, 2-propanol/*n*-hexane = 10/90, flow rate = 0.6 mL/min;  $\lambda = 256$  nm)  $t_R = 14.8$  min (major), 17.1 min (minor).

$[\alpha]_{\text{D}}^{22} = -67.5$  (*c* 0.35,  $\text{CHCl}_3$ ).

$^1\text{H NMR}$  (400 MHz,  $\text{CDCl}_3$ ):  $\delta$  10.82 (s, 1H), 7.86 (ddd,  $J = 13.2, 8.0, 1.6$  Hz, 1H), 7.59 (t,  $J = 8.0$  Hz, 1H), 7.44-7.39 (m, 1H), 7.32 (tdd,  $J = 7.6, 2.8, 0.8$  Hz, 1H), 7.15-7.07 (m, 2H), 6.97-6.94 (m, 1H), 6.86-6.81 (m, 1H), 3.76 (d,  $J = 11.6$  Hz, 3H), 1.72-1.61 (m, 2H), 1.27 (s, 3H), 1.22 (s, 3H), 0.92 (t,  $J = 7.6$  Hz, 3H).

$^{13}\text{C NMR}$  (100 MHz,  $\text{CDCl}_3$ ):  $\delta$  176.2, 163.3 (d,  $J_{\text{C-P}} = 5.0$  Hz), 153.7 (d,  $J_{\text{C-P}} = 3.0$  Hz), 135.1 (d,  $J_{\text{C-P}} = 3.0$  Hz), 134.4 (d,  $J_{\text{C-P}} = 3.0$  Hz), 133.8 (d,  $J_{\text{C-P}} = 6.0$  Hz), 131.6 (d,  $J_{\text{C-P}} = 10.0$  Hz), 125.6 (d,  $J_{\text{C-P}} = 12.0$  Hz), 124.0 (d,  $J_{\text{C-P}} = 8.0$  Hz), 122.5 (d,  $J_{\text{C-P}} = 145.0$  Hz), 119.7 (d,  $J_{\text{C-P}} = 14.0$  Hz), 118.1 (d,  $J_{\text{C-P}} = 9.0$  Hz), 110.4 (d,  $J_{\text{C-P}} = 132.0$  Hz), 51.8 (d,  $J_{\text{C-P}} = 5.0$  Hz), 43.1, 33.3, 24.4 (d,  $J_{\text{C-P}} = 17.0$  Hz), 9.2.

$^{31}\text{P NMR}$  (162 MHz,  $\text{CDCl}_3$ ):  $\delta$  39.4.

**HRMS (ESI)** *m/z*:  $[\text{M}+\text{Na}]^+$  Calcd for  $\text{C}_{19}\text{H}_{23}\text{NaO}_5\text{P}^+$  385.1175, found 385.1170.

**(S)-2-((2-Hydroxyphenyl)(methoxy)phosphoryl)phenyl cyclopropanecarboxylate (3ag)**

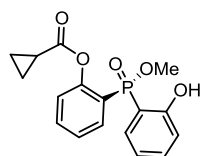

**Prepared according to general procedure E** using chiral ArPNO **C2a** (24  $\mu$ L, 0.005 mmol, 0.05 mol%), methyl bis(2-hydroxyphenyl)phosphinate **1a** (26.4 mg, 0.1 mmol),  $\text{Na}_2\text{CO}_3$  (10.6 mg, 0.1 mmol), were added in toluene (2 mL). Then, the cyclopropanecarbonyl chloride **2g** (9.1  $\mu$ L, 0.1 mmol) was added in mixture at 0  $^\circ\text{C}$  for 2 h. Purification by flash column chromatography using gradient elution to give the title product **3ag** as a white solid (29.9 mg, 90% yield, 86% ee). The eluents were pure Pet and Pet/EtOAc (10/1, v/v), respectively.

$R_f$  = 0.63 (Pet/EtOAc, 2/1, v/v). m.p: 100.8-101.2  $^\circ\text{C}$ .

**HPLC** analysis: 86% ee (IA, 2-propanol/*n*-hexane = 10/90, flow rate = 0.6 mL/min;  $\lambda$  = 256 nm)  $t_R$  = 22.0 min (major), 26.7 min (minor).

$[\alpha]_D^{22}$  = -80.7 ( $c$  0.44,  $\text{CHCl}_3$ ).

**$^1\text{H}$  NMR** (400 MHz,  $\text{CDCl}_3$ ):  $\delta$  10.95 (s, 1H), 7.94 (ddd,  $J$  = 12.4, 7.6, 2.0 Hz, 1H), 7.58 (t,  $J$  = 7.6 Hz, 1H), 7.41 (t,  $J$  = 7.6 Hz, 1H), 7.34 (td,  $J$  = 7.6, 2.8 Hz, 1H), 7.18 (dd,  $J$  = 8.4, 6.0 Hz, 1H), 7.10 (ddd,  $J$  = 14.8, 8.0, 2.0 Hz, 1H), 6.97 (dd,  $J$  = 8.4, 5.6 Hz, 1H), 6.82 (td,  $J$  = 7.2, 2.8 Hz, 1H), 3.80 (d,  $J$  = 11.6 Hz, 3H), 1.88-1.81 (m, 1H), 1.13-1.07 (m, 1H), 1.05-0.98 (m, 1H), 0.95-0.86 (m, 2H).

**$^{13}\text{C}$  NMR** (100 MHz,  $\text{CDCl}_3$ ):  $\delta$  172.9, 163.4 (d,  $J_{C-P}$  = 5.0 Hz), 153.2 (d,  $J_{C-P}$  = 4.0 Hz), 135.1 (d,  $J_{C-P}$  = 2.0 Hz), 134.3 (d,  $J_{C-P}$  = 2.0 Hz), 133.0 (d,  $J_{C-P}$  = 6.0 Hz), 131.6 (d,  $J_{C-P}$  = 10.0 Hz), 125.8 (d,  $J_{C-P}$  = 12.0 Hz), 124.2 (d,  $J_{C-P}$  = 8.0 Hz), 123.2 (d,  $J_{C-P}$  = 146.0 Hz), 119.7 (d,  $J_{C-P}$  = 13.0 Hz), 118.1 (d,  $J_{C-P}$  = 10.0 Hz), 110.4 (d,  $J_{C-P}$  = 132.0 Hz), 51.8 (d,  $J_{C-P}$  = 5.0 Hz), 12.8, 9.9 (d,  $J_{C-P}$  = 16.0 Hz).

**$^{31}\text{P}$  NMR** (243 MHz,  $\text{CDCl}_3$ ):  $\delta$  33.4.

**HRMS (ESI)**  $m/z$ :  $[\text{M}+\text{Na}]^+$  Calcd for  $\text{C}_{17}\text{H}_{17}\text{NaO}_5\text{P}^+$  355.0706, found 355.0705.

**(S)-2-((2-Hydroxyphenyl)(methoxy)phosphoryl)phenyl cyclopentanecarboxylate (3ah)**

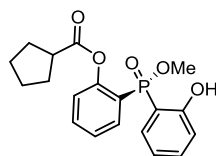

**Prepared according to general procedure E** using chiral ArPNO **C2a** (24  $\mu$ L, 0.005 mmol, 0.05 mol%), methyl bis(2-hydroxyphenyl)phosphinate **1a** (26.4 mg, 0.1 mmol),  $\text{Na}_2\text{CO}_3$  (10.6 mg, 0.1 mmol), were added in toluene (2 mL). Then, the cyclopentanecarbonyl chloride **2h** (12.2  $\mu$ L, 0.1 mmol) was added in mixture at 0  $^\circ\text{C}$  for 2 h. Purification by flash column chromatography using gradient elution to give the title product **3ah** as a white solid (33.8 mg, 94% yield, 96% ee). The eluents were pure Pet and Pet/EtOAc (10/1, v/v), respectively.

$R_f$  = 0.60 (Pet/EtOAc, 2/1, v/v). m.p: 110.5-110.9  $^\circ\text{C}$ .

**HPLC** analysis: 96% ee (IA, 2-propanol/*n*-hexane = 10/90, flow rate = 0.6 mL/min;  $\lambda$  = 256 nm)  $t_R$  = 17.1 min (major), 29.0 min (minor).

$[\alpha]_D^{22} = -58.6$  (*c* 0.31, CHCl<sub>3</sub>).

<sup>1</sup>H NMR (600 MHz, CDCl<sub>3</sub>): δ 10.92 (s, 1H), 7.93 (ddd, *J* = 12.6, 7.8, 1.8 Hz, 1H), 7.58 (td, *J* = 8.4, 2.4 Hz, 1H), 7.41 (t, *J* = 7.8 Hz, 1H), 7.34 (td, *J* = 7.8, 3.0 Hz, 1H), 7.15 (dd, *J* = 8.4, 6.0 Hz, 1H), 7.09 (ddd, *J* = 15.0, 7.8, 1.8 Hz, 1H), 6.96 (dd, *J* = 8.4, 5.4 Hz, 1H), 6.82 (td, *J* = 7.8, 3.0 Hz, 1H), 3.78 (d, *J* = 12.0 Hz, 3H), 2.98-2.92 (m, 1H), 2.07-2.01 (m, 1H), 1.92-1.78 (m, 2H), 1.76-1.66 (m, 3H), 1.64-1.58 (m, 2H).

<sup>13</sup>C NMR (150 MHz, CDCl<sub>3</sub>): δ 174.7, 163.3 (d, *J*<sub>C-P</sub> = 5.4 Hz), 153.4 (d, *J*<sub>C-P</sub> = 4.4 Hz), 135.1, 134.3, 133.1 (d, *J*<sub>C-P</sub> = 5.4 Hz), 131.6 (d, *J*<sub>C-P</sub> = 9.8 Hz), 125.7 (d, *J*<sub>C-P</sub> = 11.9 Hz), 124.0 (d, *J*<sub>C-P</sub> = 8.7 Hz), 123.0 (d, *J*<sub>C-P</sub> = 145.5 Hz), 119.7 (d, *J*<sub>C-P</sub> = 13.5 Hz), 118.0 (d, *J*<sub>C-P</sub> = 9.0 Hz), 110.5 (d, *J*<sub>C-P</sub> = 133.5 Hz), 51.8 (d, *J*<sub>C-P</sub> = 6.0 Hz), 43.5, 30.1 (d, *J*<sub>C-P</sub> = 8.4 Hz), 26.0.

<sup>31</sup>P NMR (162 MHz, CDCl<sub>3</sub>): δ 38.0.

HRMS (ESI) *m/z*: [M+Na]<sup>+</sup> Calcd for C<sub>19</sub>H<sub>21</sub>NaO<sub>5</sub>P<sup>+</sup> 383.1019, found 383.1018.

### (S)-2-((2-Hydroxyphenyl)(methoxy)phosphoryl)phenyl cyclohexanecarboxylate (**3ai**)

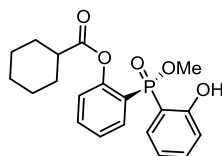

Prepared according to general procedure E using chiral ArPNO **C2a** (24 μL, 0.005 mmol, 0.05 mol%), methyl bis(2-hydroxyphenyl)phosphinate **1a** (26.4 mg, 0.1 mmol), Na<sub>2</sub>CO<sub>3</sub> (10.6 mg, 0.1 mmol), were added in toluene (2 mL). Then, the cyclohexanecarbonyl chloride **2i** (13.4 μL, 0.1 mmol) was added in mixture at 0 °C for 2 h. Purification by flash column chromatography using gradient elution to give the title product **3ai** as a yellow solid (36.3 mg, 97% yield, 94% ee). The eluents were pure Pet and Pet/EtOAc (10/1, v/v), respectively.

R<sub>f</sub> = 0.51 (Pet/EtOAc, 2/1, v/v). m.p: 108.8-109.8 °C.

HPLC analysis: 94% ee (IA, 2-propanol/*n*-hexane = 20/80, flow rate = 0.6 mL/min; λ = 256 nm) t<sub>R</sub> = 10.3 min (major), 19.2 min (minor).

$[\alpha]_D^{22} = -63.7$  (*c* 0.51, CHCl<sub>3</sub>).

<sup>1</sup>H NMR (600 MHz, CDCl<sub>3</sub>): δ 10.91 (s, 1H), 7.93-7.90 (m, 1H), 7.58 (t, *J* = 7.8 Hz, 1H), 7.41 (t, *J* = 7.8 Hz, 1H), 7.33 (td, *J* = 7.8, 3.0 Hz, 1H), 7.17-7.15 (m, 1H), 7.07 (ddd, *J* = 15.0, 7.8, 1.8 Hz, 1H), 6.96 (dd, *J* = 8.4, 5.4 Hz, 1H), 6.82 (td, *J* = 7.8, 3.0 Hz, 1H), 3.78 (d, *J* = 11.4 Hz, 3H), 2.49 (tt, *J* = 11.4, 3.6 Hz, 1H), 2.08 (dd, *J* = 12.6, 4.2 Hz, 1H), 1.80-1.72 (m, 3H), 1.66 (dt, *J* = 12.6, 4.2 Hz, 1H), 1.47 (tdd, *J* = 24.0, 12.0, 3.6 Hz, 1H), 1.41-1.20 (m, 4H).

<sup>13</sup>C NMR (150 MHz, CDCl<sub>3</sub>): δ 173.9, 163.3 (d, *J*<sub>C-P</sub> = 6.0 Hz), 153.4 (d, *J*<sub>C-P</sub> = 4.5 Hz), 135.2, 134.4, 133.1 (d, *J*<sub>C-P</sub> = 6.0 Hz), 131.6 (d, *J*<sub>C-P</sub> = 9.0 Hz), 125.6 (d, *J*<sub>C-P</sub> = 12.0 Hz), 124.0 (d, *J*<sub>C-P</sub> = 9.0 Hz), 122.9 (d, *J*<sub>C-P</sub> = 145.5 Hz), 119.7 (d, *J*<sub>C-P</sub> = 13.5 Hz), 118.0 (d, *J*<sub>C-P</sub> = 10.5 Hz), 110.5 (d, *J*<sub>C-P</sub> = 133.5 Hz), 51.8 (d, *J*<sub>C-P</sub> = 4.5 Hz), 42.9, 29.0, 28.7, 25.8, 25.5, 25.4.

<sup>31</sup>P NMR (162 MHz, CDCl<sub>3</sub>): δ 38.1.

HRMS (ESI) *m/z*: [M+Na]<sup>+</sup> Calcd for C<sub>20</sub>H<sub>23</sub>NaO<sub>5</sub>P<sup>+</sup> 397.1175, found 397.1181.

**(S)-2-((2-Hydroxyphenyl)(methoxy)phosphoryl)phenyl benzoate (3aj)**

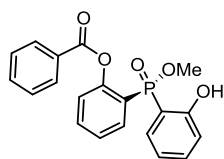

**Prepared according to general procedure E** using chiral ArPNO **C2a** (24  $\mu$ L, 0.005 mmol, 0.05 mol%), methyl bis(2-hydroxyphenyl)phosphinate **1a** (26.4 mg, 0.1 mmol),  $\text{Na}_2\text{CO}_3$  (10.6 mg, 0.1 mmol), were added in toluene (2 mL). Then, the benzoyl chloride **2j** (11.6  $\mu$ L, 0.1 mmol) was added in mixture at 0  $^\circ\text{C}$  for 2 h. Purification by flash column chromatography using gradient elution to give the title product **3aj** as a white solid (32.4 mg, 88% yield, 69% ee). The eluents were pure Pet and Pet/EtOAc (10/1, v/v), respectively.

$R_f = 0.38$  (Pet/EtOAc, 2/1, v/v). m.p: 120.4-121.4  $^\circ\text{C}$ .

**HPLC** analysis: 69% ee (IA, 2-propanol/*n*-hexane = 20/80, flow rate = 0.6 mL/min;  $\lambda = 256$  nm)  $t_R = 16.5$  min (major), 22.5 min (minor).

$[\alpha]_D^{22} = -55.7$  (*c* 0.42,  $\text{CHCl}_3$ ).

**$^1\text{H}$  NMR** (400 MHz,  $\text{CDCl}_3$ ):  $\delta$  10.67(s, 1H), 8.07-8.04 (m, 2H), 7.95 (ddd,  $J = 12.8, 7.6, 1.6$  Hz, 1H), 7.68-7.60 (m, 2H), 7.49-7.45 (m, 2H), 7.40 (tdd,  $J = 7.6, 2.8, 1.2$  Hz, 1H), 7.30-7.26 (m, 2H), 7.10 (ddd,  $J = 14.8, 8.0, 2.0$  Hz, 1H), 6.78 (tdd,  $J = 7.6, 3.2, 1.2$  Hz, 1H), 6.66 (ddd,  $J = 8.4, 5.6, 0.8$  Hz, 1H), 3.70 (d,  $J = 11.6$  Hz, 3H).

**$^{13}\text{C}$  NMR** (150 MHz,  $\text{CDCl}_3$ ):  $\delta$  164.5, 163.3 (d,  $J_{C-P} = 6.0$  Hz), 153.1 (d,  $J_{C-P} = 4.5$  Hz), 135.1, 134.5, 134.0, 133.3 (d,  $J_{C-P} = 6.0$  Hz), 131.6 (d,  $J_{C-P} = 10.5$  Hz), 130.5, 128.5, 128.5, 126.1 (d,  $J_{C-P} = 12.0$  Hz), 124.4 (d,  $J_{C-P} = 9.0$  Hz), 123.4 (d,  $J_{C-P} = 145.5$  Hz), 119.5 (d,  $J_{C-P} = 12.0$  Hz), 118.0 (d,  $J_{C-P} = 10.5$  Hz), 110.0 (d,  $J_{C-P} = 132.0$  Hz), 51.8 (d,  $J_{C-P} = 4.5$  Hz).

**$^{31}\text{P}$  NMR** (162 MHz,  $\text{CDCl}_3$ ):  $\delta$  38.2.

**HRMS (ESI)**  $m/z$ :  $[\text{M}+\text{Na}]^+$  Calcd for  $\text{C}_{20}\text{H}_{17}\text{NaO}_5\text{P}^+$  391.0706, found 391.0707.

**(S)-2-((2-Hydroxyphenyl)(methoxy)phosphoryl)phenyl 4-fluorobenzoate (3ak)**

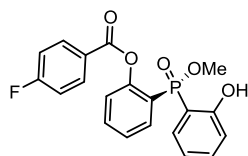

**Prepared according to general procedure E** using chiral ArPNO **C2a** (24  $\mu$ L, 0.005 mmol, 0.05 mol%), methyl bis(2-hydroxyphenyl)phosphinate **1a** (26.4 mg, 0.1 mmol),  $\text{Na}_2\text{CO}_3$  (10.6 mg, 0.1 mmol), were added in toluene (2 mL). Then, the 4-fluorobenzoyl chloride **2k** (11.8  $\mu$ L, 0.1 mmol) was added in mixture at 0  $^\circ\text{C}$  for 2 h. Purification by flash column chromatography using gradient elution to give the title product **3ak** as a white solid (35.1 mg, 91% yield, 74% ee). The eluents were pure Pet and Pet/EtOAc (10/1, v/v), respectively.

$R_f = 0.63$  (Pet/EtOAc, 2/1, v/v). m.p: 147.3-148.5  $^\circ\text{C}$ .

**HPLC** analysis: 74% ee (IA, 2-propanol/*n*-hexane = 30/70, flow rate = 0.8 mL/min;  $\lambda = 256$  nm)  $t_R = 7.7$  min (major), 18.3 min (minor).

$[\alpha]_{\text{D}}^{22} = -62.7$  (*c* 0.53,  $\text{CHCl}_3$ ).

$^1\text{H NMR}$  (600 MHz,  $\text{CDCl}_3$ ):  $\delta$  10.68 (s, 1H), 8.05 (dd,  $J = 5.6, 3.6$  Hz, 2H), 7.96 (dd,  $J = 8.4, 5.2$  Hz, 1H), 7.66 (t,  $J = 5.2$  Hz, 1H), 7.41 (td,  $J = 5.2, 1.6$  Hz, 1H), 7.29-7.26 (m, 2H), 7.13 (t,  $J = 5.6$  Hz, 2H), 7.05 (q,  $J = 5.2$  Hz, 1H), 6.78 (td,  $J = 5.2, 2.0$  Hz, 1H), 6.65 (dd,  $J = 5.6, 3.6$  Hz, 1H), 3.72 (d,  $J = 7.6$  Hz, 3H).

$^{13}\text{C NMR}$  (150 MHz,  $\text{CDCl}_3$ ):  $\delta$  167.3, 165.6, 163.4, 163.2 (d,  $J_{\text{C-P}} = 5.3$  Hz), 153.0 (d,  $J_{\text{C-P}} = 4.1$  Hz), 135.1, 134.5, 133.2 (d,  $J_{\text{C-P}} = 9.2$  Hz), 131.5 (d,  $J_{\text{C-P}} = 10.1$  Hz), 126.1 (d,  $J_{\text{C-P}} = 11.9$  Hz), 124.7 (d,  $J_{\text{C-P}} = 3.0$  Hz), 124.4 (d,  $J_{\text{C-P}} = 8.6$  Hz), 123.3 (d,  $J_{\text{C-P}} = 147.6$  Hz), 119.6 (d,  $J_{\text{C-P}} = 13.2$  Hz), 117.9 (d,  $J_{\text{C-P}} = 9.2$  Hz), 115.7 (d,  $J_{\text{C-P}} = 22.1$  Hz), 110.0 (d,  $J_{\text{C-F}} = 134.0$  Hz), 51.8 (d,  $J_{\text{C-P}} = 5.6$  Hz).

$^{31}\text{P NMR}$  (243 MHz,  $\text{CDCl}_3$ ):  $\delta$  38.0.

$^{19}\text{F NMR}$  (376 MHz,  $\text{CDCl}_3$ ):  $\delta$  -104.01.

**HRMS (ESI)** *m/z*:  $[\text{M}+\text{Na}]^+$  Calcd for  $\text{C}_{20}\text{H}_{16}\text{FNaO}_5\text{P}^+$  409.0612, found 409.0620.

### (*S*)-2-((2-Hydroxyphenyl)(methoxy)phosphoryl)phenyl 4-methoxybenzoate (**3al**)

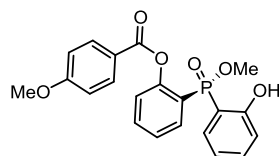

**Prepared according to general procedure E** using chiral ArPNO **C2a** (24  $\mu\text{L}$ , 0.005 mmol, 0.05 mol%), methyl bis(2-hydroxyphenyl)phosphinate **1a** (26.4 mg, 0.1 mmol),  $\text{Na}_2\text{CO}_3$  (10.6 mg, 0.1 mmol), were added in toluene (2 mL). Then, the 4-methoxybenzoyl chloride **2l** (13.5  $\mu\text{L}$ , 0.1 mmol) was added in mixture at 0  $^\circ\text{C}$  for 2 h. Purification by flash column chromatography using gradient elution to give the title product **3al** as a white solid (32.6 mg, 82% yield, 60% ee). The eluents were pure Pet and Pet/EtOAc (10/1, v/v), respectively.

$R_f = 0.63$  (Pet/EtOAc, 2/1, v/v). m.p: 112.9-113.4  $^\circ\text{C}$ .

**HPLC** analysis: 60% ee (IA, 2-propanol/*n*-hexane = 25/75, flow rate = 0.8 mL/min;  $\lambda = 256$  nm)  $t_R = 11.0$  min (major), 26.8 min (minor).

$[\alpha]_{\text{D}}^{22} = -107.7$  (*c* 0.61,  $\text{CHCl}_3$ ).

$^1\text{H NMR}$  (600 MHz,  $\text{CDCl}_3$ ):  $\delta$  10.70 (s, 1H), 8.00 (d,  $J = 9.0$  Hz, 2H), 7.93 (ddd,  $J = 12.6, 7.2, 1.2$  Hz, 1H), 7.66-7.63 (m, 1H), 7.38 (td,  $J = 7.8, 3.0$  Hz, 1H), 7.30-7.27 (m, 2H), 7.10 (ddd,  $J = 15.0, 7.8, 1.8$  Hz, 1H), 6.94 (d,  $J = 9.0$  Hz, 2H), 6.78 (td,  $J = 7.8, 3.0$  Hz, 1H), 6.69 (dd,  $J = 8.4, 5.4$  Hz, 1H), 3.90 (s, 3H), 3.70 (d,  $J = 12.0$  Hz, 3H).

$^{13}\text{C NMR}$  (150 MHz,  $\text{CDCl}_3$ ):  $\delta$  164.2 (d,  $J_{\text{C-P}} = 10.1$  Hz), 163.3 (d,  $J_{\text{C-P}} = 5.4$  Hz), 153.2 (d,  $J_{\text{C-P}} = 3.3$  Hz), 135.1, 134.4, 133.3 (d,  $J_{\text{C-P}} = 6.5$  Hz), 132.7, 131.6 (d,  $J_{\text{C-P}} = 9.8$  Hz), 125.9 (d,  $J_{\text{C-P}} = 12.0$  Hz), 124.5 (d,  $J_{\text{C-P}} = 7.7$  Hz), 123.4 (d,  $J_{\text{C-P}} = 145.5$  Hz), 120.9, 119.5 (d,  $J_{\text{C-P}} = 13.1$  Hz), 117.9 (d,  $J_{\text{C-P}} = 9.8$  Hz), 113.8, 110.6, 109.7, 55.6, 51.8 (d,  $J_{\text{C-P}} = 5.6$  Hz).

$^{31}\text{P NMR}$  (243 MHz,  $\text{CDCl}_3$ ):  $\delta$  38.4.

**HRMS (ESI)** *m/z*:  $[\text{M}+\text{Na}]^+$  Calcd for  $\text{C}_{21}\text{H}_{19}\text{NaO}_6\text{P}^+$  421.0811, found 421.0819.

**(S)-2-((2-Hydroxyphenyl)(methoxy)phosphoryl)phenyl 2,2-diphenylacetate (3am)**

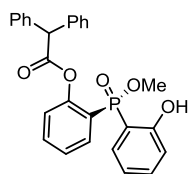

**Prepared according to general procedure E** using chiral ArPNO **C2a** (24  $\mu$ L, 0.005 mmol, 0.05 mol%), methyl bis(2-hydroxyphenyl)phosphinate **1a** (26.4 mg, 0.1 mmol),  $\text{Na}_2\text{CO}_3$  (10.6 mg, 0.1 mmol), were added in toluene (2 mL). Then, the 2,2-diphenylacetyl chloride **2m** (23.0 mg, 0.1 mmol) was added in mixture at 0  $^\circ\text{C}$  for 2 h. Purification by flash column chromatography using gradient elution to give the title product **3am** as a white solid (41.7 mg, 91% yield, 87% ee). The eluents were pure Pet and Pet/EtOAc (10/1, v/v), respectively.

$R_f = 0.55$  (Pet/EtOAc, 2/1, v/v). m.p: 123.6-124.4  $^\circ\text{C}$ .

**HPLC** analysis: 87% ee (IA, 2-propanol/*n*-hexane = 20/80, flow rate = 0.6 mL/min;  $\lambda = 256$  nm)  $t_R = 13.6$  min (major), 28.4 min (minor).

$[\alpha]_D^{22} = -116.9$  (*c* 0.58,  $\text{CHCl}_3$ ).

**$^1\text{H}$  NMR** (400 MHz,  $\text{CDCl}_3$ ):  $\delta$  10.98 (s, 1H), 7.91 (ddd,  $J = 12.4, 7.6, 2.0$  Hz, 1H), 7.54 (td,  $J = 8.0, 1.6$  Hz, 1H), 7.44-7.42 (m, 2H), 7.36-7.23 (m, 10H), 7.12-7.06 (m, 2H), 6.89 (dd,  $J = 8.4, 5.6$  Hz, 1H), 6.77 (td,  $J = 7.6, 2.8$  Hz, 1H), 5.31 (s, 1H), 3.65 (d,  $J = 11.6$  Hz, 3H).

**$^{13}\text{C}$  NMR** (150 MHz,  $\text{CDCl}_3$ ):  $\delta$  170.6, 163.2 (d,  $J_{C-P} = 5.6$  Hz), 152.9 (d,  $J_{C-P} = 4.1$  Hz), 138.0 (d,  $J_{C-P} = 39.8$  Hz), 135.2, 134.3, 133.1 (d,  $J_{C-P} = 5.6$  Hz), 131.5 (d,  $J_{C-P} = 9.2$  Hz), 128.8 (d,  $J_{C-P} = 8.9$  Hz), 128.8, 127.6 (d,  $J_{C-P} = 4.2$  Hz), 126.0 (d,  $J_{C-P} = 12.2$  Hz), 123.6 (t,  $J_{C-P} = 8.0$  Hz), 122.7, 119.7 (d,  $J_{C-P} = 13.4$  Hz), 118.1 (d,  $J_{C-P} = 9.8$  Hz), 110.5 (d,  $J_{C-P} = 132.3$  Hz), 56.4, 51.8 (d,  $J_{C-P} = 5.6$  Hz).

**$^{31}\text{P}$  NMR** (243 MHz,  $\text{CDCl}_3$ ):  $\delta$  37.7.

**HRMS (ESI)**  $m/z$ :  $[\text{M}+\text{Na}]^+$  Calcd for  $\text{C}_{27}\text{H}_{23}\text{NaO}_5\text{P}^+$  481.1175, found 481.1172.

**(S)-2-((2-hydroxyphenyl)(methoxy)phosphoryl)phenyl 2-phenylacetate (3an)**

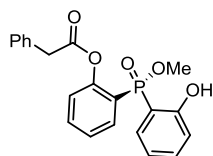

**Prepared according to general procedure E** using chiral ArPNO **C2a** (24  $\mu$ L, 0.005 mmol, 0.05 mol%), methyl bis(2-hydroxyphenyl)phosphinate **1a** (26.4 mg, 0.1 mmol),  $\text{Na}_2\text{CO}_3$  (10.6 mg, 0.1 mmol), were added in toluene (2 mL). Then, the phenylacetyl chloride **2n** (13.2  $\mu$ L, 0.1 mmol) was added in mixture at 0  $^\circ\text{C}$  for 2 h. Purification by flash column chromatography using gradient elution to give the title product **3an** as a white solid (35.1 mg, 92% yield, 86% ee). The eluents were pure Pet and Pet/EtOAc (10/1, v/v), respectively.

$R_f = 0.52$  (Pet/EtOAc, 2/1, v/v). m.p: 113.8-114.2  $^\circ\text{C}$ .

**HPLC** analysis: 86% ee (IC, 2-propanol/*n*-hexane = 30/70, flow rate = 0.8 mL/min;  $\lambda = 256$  nm)  $t_R = 19.5$  min (minor), 22.6 min (major).

$[\alpha]_D^{22} = -123.5$  (*c* 0.52,  $\text{CHCl}_3$ ).

<sup>1</sup>H NMR (600 MHz, CDCl<sub>3</sub>): δ 11.05 (s, 1H), 7.95 (ddd, *J* = 12.6, 7.8, 1.8 Hz, 1H), 7.57-7.54 (m, 1H), 7.45-7.42 (m, 1H), 7.36-7.30 (m, 3H), 7.29-7.27 (m, 3H), 7.12-7.06 (m, 2H), 7.00 (ddd, *J* = 8.4, 5.4, 1.2 Hz, 1H), 6.84 (tdd, *J* = 7.8, 3.0, 1.2 Hz, 1H), 3.87 (d, *J* = 16.2 Hz, 1H), 3.78 (d, *J* = 11.4 Hz, 3H), 3.72 (d, *J* = 11.4 Hz, 1H).

<sup>13</sup>C NMR (150 MHz, CDCl<sub>3</sub>): δ 169.4, 163.2 (d, *J*<sub>C-P</sub> = 4.5 Hz), 153.1 (d, *J*<sub>C-P</sub> = 4.5 Hz), 135.3, 134.4, 133.1, 132.9 (d, *J*<sub>C-P</sub> = 6.0 Hz), 131.7 (d, *J*<sub>C-P</sub> = 9.0 Hz), 129.2 (d, *J*<sub>C-P</sub> = 135.0 Hz), 127.4, 125.9 (d, *J*<sub>C-P</sub> = 10.5 Hz), 124.0 (d, *J*<sub>C-P</sub> = 9.0 Hz), 123.5, 122.6, 119.8 (d, *J*<sub>C-P</sub> = 13.5 Hz), 118.0 (d, *J*<sub>C-P</sub> = 10.5 Hz), 110.5 (d, *J*<sub>C-P</sub> = 132.0 Hz), 51.8 (d, *J*<sub>C-P</sub> = 6.0 Hz), 40.7.

<sup>31</sup>P NMR (243 MHz, CDCl<sub>3</sub>): δ 37.5.

HRMS (ESI) *m/z*: [M+Na]<sup>+</sup> Calcd for C<sub>21</sub>H<sub>19</sub>NaO<sub>5</sub>P<sup>+</sup> 405.0862, found 405.0864.

**(*S*)-4-Bromo-2-((5-bromo-2-hydroxyphenyl)(methoxy)phosphoryl)phenyl 3,3-dimethyl butanoate (3ba)**

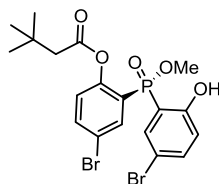

Prepared according to general procedure E using chiral ArPNO **C2a** (24 μL, 0.005 mmol, 0.05 mol%), methyl bis(2-hydroxyphenyl)phosphinate **1b** (42.0 mg, 0.1 mmol), Na<sub>2</sub>CO<sub>3</sub> (10.6 mg, 0.1 mmol), were added in toluene (2 mL). Then, the 3,3-dimethylbutanoyl chloride **2a** (14.9 μL, 0.1 mmol) was added in mixture at 0 °C for 2 h. Purification by flash column chromatography using gradient elution to give the title product **3ba** as a yellow solid (48.2 mg, 93% yield, 93% ee). The eluents were pure Pet and Pet/EtOAc (10/1, v/v), respectively.

R<sub>f</sub> = 0.62 (Pet/EtOAc, 2/1, v/v). m.p: 95.6-96.4 °C.

HPLC analysis: 93% ee (IC, 2-propanol/*n*-hexane = 30/70, flow rate = 0.8 mL/min; λ = 256 nm) t<sub>R</sub> = 7.9 min (major), 6.2 min (minor).

[α]<sub>D</sub><sup>22</sup> = -134.8 (*c* 0.62, CHCl<sub>3</sub>).

<sup>1</sup>H NMR (400 MHz, CDCl<sub>3</sub>): δ 10.83 (s, 1H), 8.07 (dd, *J* = 12.4, 2.4 Hz, 1H), 7.71 (dd, *J* = 8.8, 2.8 Hz, 1H), 7.49 (dd, *J* = 9.2, 2.4 Hz, 1H), 7.21 (dd, *J* = 14.8, 2.4 Hz, 1H), 7.09 (dd, *J* = 8.4, 6.0 Hz, 1H), 6.87 (dd, *J* = 8.8, 6.0 Hz, 1H), 3.82 (d, *J* = 11.6 Hz, 3H), 2.47 (d, *J* = 14.8 Hz, 1H), 2.31 (d, *J* = 14.4 Hz, 1H), 1.06 (s, 9H).

<sup>13</sup>C NMR (100 MHz, CDCl<sub>3</sub>): δ 169.5, 162.3 (d, *J*<sub>C-P</sub> = 5.0 Hz), 152.0 (d, *J*<sub>C-P</sub> = 4.0 Hz), 138.3, 137.5, 135.6 (d, *J*<sub>C-P</sub> = 6.0 Hz), 133.5 (d, *J*<sub>C-P</sub> = 11.0 Hz), 125.9 (d, *J*<sub>C-P</sub> = 9.0 Hz), 124.7 (d, *J*<sub>C-P</sub> = 145.0 Hz), 120.3 (d, *J*<sub>C-P</sub> = 10.0 Hz), 119.2 (d, *J*<sub>C-P</sub> = 15.0 Hz), 113.0, 111.6 (d, *J*<sub>C-P</sub> = 17.0 Hz), 52.3 (d, *J*<sub>C-P</sub> = 5.0 Hz), 47.0, 31.0, 29.6.

<sup>31</sup>P NMR (243 MHz, CDCl<sub>3</sub>): δ 33.4.

HRMS (ESI) *m/z*: [M+Na]<sup>+</sup> Calcd for C<sub>19</sub>H<sub>21</sub>Br<sub>2</sub>NaO<sub>5</sub>P<sup>+</sup> 540.9386, found 540.9377.

**(S)-4-chloro-2-((5-chloro-2-hydroxyphenyl)(methoxy)phosphoryl)phenyl 3,3-dimethylbutanoate (3ca)**

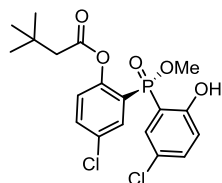

Prepared according to general procedure E using chiral ArPNO **C2a** (24  $\mu$ L, 0.005 mmol, 0.05 mol%), methyl bis(2-hydroxyphenyl)phosphinate **1c** (33.2 mg, 0.1 mmol),  $\text{Na}_2\text{CO}_3$  (10.6 mg, 0.1 mmol), were added in toluene (2 mL). Then, the 3,3-dimethylbutanoyl chloride **2a** (14.9  $\mu$ L, 0.1 mmol) was added in mixture at 0  $^\circ\text{C}$  for 2 h. Purification by flash column chromatography using gradient elution to give the title product **3ca** as a yellow solid (40.0 mg, 93% yield, 91% ee). The eluents were pure Pet and Pet/EtOAc (10/1, v/v), respectively.

$R_f$  = 0.59 (Pet/EtOAc, 2/1, v/v). m.p: 92.6-93.2  $^\circ\text{C}$ .

**HPLC** analysis: 91% ee (IC, 2-propanol/*n*-hexane = 30/70, flow rate = 0.8 mL/min;  $\lambda$  = 256 nm)  $t_R$  = 5.8 min (minor), 7.3 min (major).

$[\alpha]_D^{22}$  = -125.6 (*c* 0.60,  $\text{CHCl}_3$ ).

**$^1\text{H}$  NMR** (400 MHz,  $\text{CDCl}_3$ ):  $\delta$  10.80 (s, 1H), 7.92 (dd,  $J$  = 12.4, 2.4 Hz, 1H), 7.55 (dd,  $J$  = 8.8, 2.8 Hz, 1H), 7.36 (dd,  $J$  = 9.2, 2.8 Hz, 1H), 7.14 (dd,  $J$  = 8.8, 6.0 Hz, 1H), 7.06 (dd,  $J$  = 14.8, 2.4 Hz, 1H), 6.92 (dd,  $J$  = 9.2, 6.4 Hz, 1H), 3.82 (d,  $J$  = 11.6 Hz, 3H), 2.47 (d,  $J$  = 14.4 Hz, 1H), 2.31 (d,  $J$  = 14.4 Hz, 1H), 1.06 (s, 9H).

**$^{13}\text{C}$  NMR** (100 MHz,  $\text{CDCl}_3$ ):  $\delta$  169.6, 161.8 (d,  $J_{\text{C-P}}$  = 5.0 Hz), 151.4, 135.5 (d,  $J_{\text{C-P}}$  = 2.0 Hz), 134.5 (d,  $J_{\text{C-P}}$  = 3.0 Hz), 132.7 (d,  $J_{\text{C-P}}$  = 6.0 Hz), 131.6 (d,  $J_{\text{C-P}}$  = 15.0 Hz), 130.5 (d,  $J_{\text{C-P}}$  = 11.0 Hz), 125.5 (d,  $J_{\text{C-P}}$  = 9.0 Hz), 124.9 (d,  $J_{\text{C-P}}$  = 21.0 Hz), 124.1 (d,  $J_{\text{C-P}}$  = 106.0 Hz), 119.8 (d,  $J_{\text{C-P}}$  = 11.0 Hz), 111.7 (d,  $J_{\text{C-P}}$  = 133 Hz), 52.3 (d,  $J_{\text{C-P}}$  = 6.0 Hz), 47.0, 31.0, 29.6.

**$^{31}\text{P}$  NMR** (162 MHz,  $\text{CDCl}_3$ ):  $\delta$  33.7.

**HRMS (ESI)**  $m/z$ :  $[\text{M}+\text{Na}]^+$  Calcd for  $\text{C}_{19}\text{H}_{21}\text{Cl}_2\text{NaO}_5\text{P}^+$  453.0396, found 453.0398.

**(S)-2-((2-Hydroxy-5-methylphenyl)(methoxy)phosphoryl)-4-methylphenyl 3,3-dimethylbutanoate (3da)**

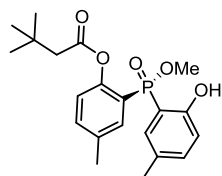

Prepared according to general procedure E using chiral ArPNO **C2a** (24  $\mu$ L, 0.005 mmol, 0.05 mol%), methyl bis(2-hydroxy-5-methylphenyl)phosphinate **1c** (29.2 mg, 0.1 mmol),  $\text{Na}_2\text{CO}_3$  (10.6 mg, 0.1 mmol), were added in toluene (2 mL). Then, the 3,3-dimethylbutanoyl chloride **2a** (14.9  $\mu$ L, 0.1 mmol) was added in mixture at 0  $^\circ\text{C}$  for 2 h. Purification by flash column chromatography using gradient elution to give the title product **3ca** as a white solid (36.3 mg, 93% yield, 93% ee). The eluents were pure Pet and Pet/EtOAc (10/1, v/v), respectively.

$R_f$  = 0.58 (Pet/EtOAc, 2/1, v/v). m.p: 102.9-103.4  $^\circ\text{C}$ .



**HPLC analysis:** 93% ee (IC, 2-propanol/*n*-hexane = 30/70, flow rate = 0.8 mL/min;  $\lambda$  = 256 nm)  
 $t_R$  = 12.3 min (major), 14.1 min (minor).

$[\alpha]_D^{22} = -112.5$  ( $c$  0.53,  $\text{CHCl}_3$ ).

**$^1\text{H NMR}$**  (600 MHz,  $\text{CDCl}_3$ ):  $\delta$  10.74 (s, 1H), 7.74 (dd,  $J$  = 13.2, 2.4 Hz, 1H), 7.37 (dd,  $J$  = 8.4, 2.4 Hz, 1H), 7.20 (dd,  $J$  = 8.4, 1.8 Hz, 1H), 7.04 (dd,  $J$  = 8.4, 6.0 Hz, 1H), 6.88-6.85 (m, 2H), 3.77 (d,  $J$  = 11.4 Hz, 3H), 2.44 (d,  $J$  = 15.0 Hz, 1H), 2.41 (s, 3H), 2.23 (d,  $J$  = 14.4 Hz, 1H), 2.17 (s, 3H), 1.05 (s, 9H).

**$^{13}\text{C NMR}$**  (150 MHz,  $\text{CDCl}_3$ ):  $\delta$  170.2, 161.1 (d,  $J_{C-P}$  = 5.3 Hz), 150.8 (d,  $J_{C-P}$  = 4.2 Hz), 136.1, 135.6 (d,  $J_{C-P}$  = 11.3 Hz), 134.9, 133.2 (d,  $J_{C-P}$  = 5.3 Hz), 131.2 (d,  $J_{C-P}$  = 9.9 Hz), 128.8 (d,  $J_{C-P}$  = 13.2 Hz), 123.8 (d,  $J_{C-P}$  = 8.9 Hz), 122.7 (d,  $J_{C-P}$  = 144.5 Hz), 117.8 (d,  $J_{C-P}$  = 10.5 Hz), 110.1 (d,  $J_{C-P}$  = 132.3 Hz), 51.7 (d,  $J_{C-P}$  = 5.4 Hz), 46.9, 30.9, 29.7, 21.0, 20.5.

**$^{31}\text{P NMR}$**  (243 MHz,  $\text{CDCl}_3$ ):  $\delta$  37.9.

**HRMS (ESI)**  $m/z$ :  $[\text{M}+\text{Na}]^+$  Calcd for  $\text{C}_{21}\text{H}_{27}\text{NaO}_5\text{P}^+$  413.1488, found 413.1492.

**(*S*)-2-((2-Hydroxy-5-methoxyphenyl)(methoxy)phosphoryl)-4-methoxyphenyl 3,3-dimethyl butanoate (**3ea**)**

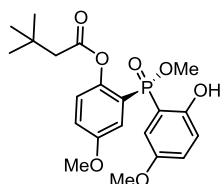

**Prepared according to general procedure E** using chiral ArPNO **C2a** (24  $\mu\text{L}$ , 0.005 mmol, 0.05 mol%), methyl bis(2-hydroxy-5-methoxyphenyl)phosphinate **1d** (32.4 mg, 0.1 mmol),  $\text{Na}_2\text{CO}_3$  (10.6 mg, 0.1 mmol), were added in toluene (2 mL). Then, the 3,3-dimethylbutanoyl chloride **2a** (14.9  $\mu\text{L}$ , 0.1 mmol) was added in mixture at 0  $^\circ\text{C}$  for 2 h. Purification by flash column chromatography using gradient elution to give the title product **3da** as a white solid (38.4 mg, 91% yield, 90% ee). The eluents were pure Pet and Pet/EtOAc (10/1, v/v), respectively.

$R_f$  = 0.48 (Pet/EtOAc, 2/1, v/v). m.p: 108.4-110.2  $^\circ\text{C}$ .

**HPLC analysis:** 90% ee (IC, 2-propanol/*n*-hexane = 30/70, flow rate = 0.8 mL/min;  $\lambda$  = 256 nm)  
 $t_R$  = 34.2 min (major), 19.2 min (minor).

$[\alpha]_D^{22} = -198.5$  ( $c$  0.47,  $\text{CHCl}_3$ ).

**$^1\text{H NMR}$**  (400 MHz,  $\text{CDCl}_3$ ):  $\delta$  10.46 (s, 1H), 7.42 (dd,  $J$  = 13.6, 2.4 Hz, 1H), 7.08-7.00 (m, 3H), 6.91 (dd,  $J$  = 9.2, 6.4 Hz, 1H), 6.59 (dd,  $J$  = 15.6, 2.8 Hz, 1H), 3.85 (s, 3H), 3.79 (d,  $J$  = 11.6 Hz, 3H), 3.66 (s, 3H), 2.43 (d,  $J$  = 14.8 Hz, 1H), 2.24 (d,  $J$  = 14.4 Hz, 1H), 1.05 (s, 9H).

**$^{13}\text{C NMR}$**  (100 MHz,  $\text{CDCl}_3$ ):  $\delta$  170.5, 157.4 (d,  $J_{C-P}$  = 5.0 Hz), 156.9 (d,  $J_{C-P}$  = 14.0 Hz), 152.5 (d,  $J_{C-P}$  = 17.0 Hz), 146.2, 125.2 (d,  $J_{C-P}$  = 10.0 Hz), 124.3, 122.9, 122.5 (d,  $J_{C-P}$  = 2.0 Hz), 119.8 (d,  $J_{C-P}$  = 2.0 Hz), 119.1 (d,  $J_{C-P}$  = 11.0 Hz), 117.4 (d,  $J_{C-P}$  = 6.0 Hz), 114.5 (d,  $J_{C-P}$  = 11.0 Hz), 110.2 (d,  $J_{C-P}$  = 133.0 Hz), 56.0 (d,  $J_{C-P}$  = 2.0 Hz), 51.9, 51.9, 46.9, 30.8, 29.7.

**$^{31}\text{P NMR}$**  (243 MHz,  $\text{CDCl}_3$ ):  $\delta$  36.8.

**HRMS (ESI)**  $m/z$ :  $[\text{M}+\text{Na}]^+$  Calcd for  $\text{C}_{21}\text{H}_{27}\text{NaO}_7\text{P}^+$  445.1387, found 445.1391.

**(S)-3-((4-Hydroxy-[1,1'-biphenyl]-3-yl)(methoxy)phosphoryl)-[1,1'-biphenyl]-4-yl 3,3-dimethylbutanoate (3fa)**

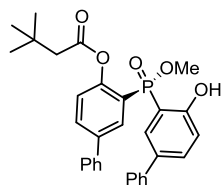

**Prepared according to general procedure E** using chiral ArPNO **C2a** (24  $\mu$ L, 0.005 mmol, 0.05 mol%), methyl bis(4-hydroxy-[1,1'-biphenyl]-3-yl)phosphinate **1e** (41.6 mg, 0.1 mmol),  $\text{Na}_2\text{CO}_3$  (10.6 mg, 0.1 mmol), were added in toluene (2 mL). Then, the 3,3-dimethylbutanoyl chloride **2a** (14.9  $\mu$ L, 0.1 mmol) was added in mixture at 0  $^\circ\text{C}$  for 2 h. Purification by flash column chromatography using gradient elution to give the title product **3ea** as a white solid (46.3 mg, 90% yield, 95% ee). The eluents were pure Pet and Pet/EtOAc (10/1, v/v), respectively.

$R_f = 0.56$  (Pet/EtOAc, 2/1, v/v). m.p: 110.5-111.4  $^\circ\text{C}$ .

**HPLC** analysis: 95% ee (IA, 2-propanol/*n*-hexane = 30/70, flow rate = 0.8 mL/min;  $\lambda = 256$  nm)  $t_R = 8.6$  min (major), 7.8 min (minor).

$[\alpha]_D^{22} = -309.4$  (*c* 0.51,  $\text{CHCl}_3$ ).

**$^1\text{H}$  NMR** (600 MHz,  $\text{CDCl}_3$ ):  $\delta$  11.01 (s, 1H), 8.20 (dd,  $J = 12.6, 2.4$  Hz, 1H), 7.79 (dd,  $J = 8.4, 1.8$  Hz, 1H), 7.66 (dd,  $J = 9.0, 2.4$  Hz, 1H), 7.60-7.59 (m, 2H), 7.47 (td,  $J = 7.8, 1.8$  Hz, 2H), 7.42-7.36 (m, 6H), 7.28 (tt,  $J = 6.6, 1.2$  Hz, 1H), 7.26-7.24 (m, 1H), 7.07 (dd,  $J = 8.4, 5.4$  Hz, 1H), 3.85 (d,  $J = 11.4$  Hz, 3H), 2.48 (d,  $J = 14.4$  Hz, 1H), 2.30 (d,  $J = 14.4$  Hz, 1H), 1.06 (s, 9H).

**$^{13}\text{C}$  NMR** (100 MHz,  $\text{CDCl}_3$ ):  $\delta$  170.1, 162.8 (d,  $J_{\text{C-P}} = 6.0$  Hz), 152.2 (d,  $J_{\text{C-P}} = 5.0$  Hz), 139.8 (d,  $J_{\text{C-P}} = 46.0$  Hz), 139.2 (d,  $J_{\text{C-P}} = 12.0$  Hz), 134.1 (d,  $J_{\text{C-P}} = 2.0$  Hz), 133.2, 133.0 (d,  $J_{\text{C-P}} = 3.0$  Hz), 131.7 (d,  $J_{\text{C-P}} = 5.0$  Hz), 129.9 (d,  $J_{\text{C-P}} = 11.0$  Hz), 129.1, 128.9, 128.1, 127.4, 127.2, 126.8, 124.4 (d,  $J_{\text{C-P}} = 9.0$  Hz), 124.0, 122.6, 118.5 (d,  $J_{\text{C-P}} = 10.0$  Hz), 110.9 (d,  $J_{\text{C-P}} = 132.0$  Hz), 52.0 (d,  $J_{\text{C-P}} = 5.0$  Hz), 47.0, 31.0, 29.7.

**$^{31}\text{P}$  NMR** (243 MHz,  $\text{CDCl}_3$ ):  $\delta$  37.3.

**HRMS (ESI)**  $m/z$ :  $[\text{M}+\text{Na}]^+$  Calcd for  $\text{C}_{31}\text{H}_{31}\text{NaO}_5\text{P}^+$  537.1081, found 537.1080.

**(S)-2-(Ethoxy(2-hydroxyphenyl)phosphoryl)phenyl 3,3-dimethylbutanoate (3ga)**

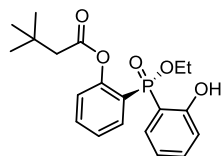

**Prepared according to general procedure E** using chiral ArPNO **C2a** (24  $\mu$ L, 0.005 mmol, 0.05 mol%), methyl ethyl bis(2-hydroxyphenyl)phosphinate **1f** (27.8 mg, 0.1 mmol),  $\text{Na}_2\text{CO}_3$  (10.6 mg, 0.1 mmol), were added in toluene (2 mL). Then, the 3,3-dimethylbutanoyl chloride **2a** (14.9  $\mu$ L, 0.1 mmol) was added in mixture at 0  $^\circ\text{C}$  for 2 h. Purification by flash column chromatography using gradient elution to give the title product **3fa** as a white solid (35.0 mg, 93% yield, 94% ee). The eluents were pure Pet and Pet/EtOAc (10/1, v/v), respectively.

$R_f = 0.55$  (Pet/EtOAc, 2/1, v/v). m.p: 108.8-110.6  $^\circ\text{C}$ .

**HPLC** analysis: 94% ee (IA, 2-propanol/*n*-hexane = 30/70, flow rate = 0.6 mL/min;  $\lambda = 256$  nm)  $t_R = 8.5$  min (major), 9.9 min (minor).

$[\alpha]_D^{22} = -77.9$  (*c* 0.42, CHCl<sub>3</sub>).

<sup>1</sup>H NMR (400 MHz, CDCl<sub>3</sub>): δ 11.03 (s, 1H), 7.96 (ddd, *J* = 12.4, 7.6, 1.6 Hz, 1H), 7.59-7.55 (m, 1H), 7.42-7.37 (m, 1H), 7.34 (tdd, *J* = 7.6, 2.8, 1.2 Hz, 1H), 7.15 (ddd, *J* = 8.0, 5.6, 0.8 Hz, 1H), 7.08 (ddd, *J* = 14.8, 7.6, 1.6 Hz, 1H), 6.95 (ddd, *J* = 8.4, 5.6, 0.8 Hz, 1H), 6.80 (tdd, *J* = 7.2, 2.8, 0.8 Hz, 1H), 4.31-4.21 (m, 1H), 4.09-3.99 (m, 1H), 2.46 (d, *J* = 14.4 Hz, 1H), 2.26 (d, *J* = 14.8 Hz, 1H), 1.38 (t, *J* = 6.8 Hz, 3H), 1.05 (s, 9H).

<sup>13</sup>C NMR (100 MHz, CDCl<sub>3</sub>): δ 169.9, 163.1 (d, *J*<sub>C-P</sub> = 6.0 Hz), 153.1 (d, *J*<sub>C-P</sub> = 4.0 Hz), 135.0 (d, *J*<sub>C-P</sub> = 3.0 Hz), 134.1 (d, *J*<sub>C-P</sub> = 2.0 Hz), 133.0 (d, *J*<sub>C-P</sub> = 5.0 Hz), 131.7 (d, *J*<sub>C-P</sub> = 10.0 Hz), 125.6 (d, *J*<sub>C-P</sub> = 12.0 Hz), 124.0 (d, *J*<sub>C-P</sub> = 8.0 Hz), 123.5 (d, *J*<sub>C-P</sub> = 146.0 Hz), 119.6 (d, *J*<sub>C-P</sub> = 13.0 Hz), 117.9 (d, *J*<sub>C-P</sub> = 9.0 Hz), 111.4 (d, *J*<sub>C-P</sub> = 133.0 Hz), 61.7 (d, *J*<sub>C-P</sub> = 5.0 Hz), 46.9, 30.9, 29.7, 16.4 (d, *J*<sub>C-P</sub> = 7.0 Hz).

<sup>31</sup>P NMR (162 MHz, CDCl<sub>3</sub>): δ 35.5.

HRMS (ESI) *m/z*: [M+Na]<sup>+</sup> Calcd for C<sub>20</sub>H<sub>25</sub>NaO<sub>5</sub>P<sup>+</sup> 399.1332, found 399.1339.

### (*S*)-2-((2-Hydroxyphenyl)(propoxy)phosphoryl)phenyl 3,3-dimethylbutanoate (**3ha**)

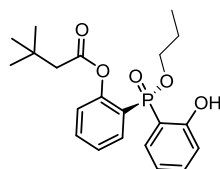

Prepared according to general procedure E using chiral ArPNO **C2a** (24 μL, 0.005 mmol, 0.05 mol%), propyl bis(2-hydroxyphenyl)phosphinate **1g** (29.2 mg, 0.1 mmol), Na<sub>2</sub>CO<sub>3</sub> (10.6 mg, 0.1 mmol), were added in toluene (2 mL). Then, the 3,3-dimethylbutanoyl chloride **2a** (14.9 μL, 0.1 mmol) was added in mixture at 0 °C for 2 h. Purification by flash column chromatography using gradient elution to give the title product **3ga** as a white solid (35.5 mg, 91% yield, 94% ee). The eluents were pure Pet and Pet/EtOAc (10/1, v/v), respectively.

*R*<sub>f</sub> = 0.57 (Pet/EtOAc, 2/1, v/v). m.p: 102.9-103.4 °C.

HPLC analysis: 94% ee (IA, 2-propanol/*n*-hexane = 5/95, flow rate = 0.4 mL/min; λ = 256 nm) *t*<sub>R</sub> = 23.7 min (major), 28.4 min (minor).

$[\alpha]_D^{22} = -76.3$  (*c* 0.52, CHCl<sub>3</sub>).

<sup>1</sup>H NMR (400 MHz, CDCl<sub>3</sub>): δ 11.03 (s, 1H), 7.96 (ddd, *J* = 12.0, 7.6, 1.6 Hz, 1H), 7.57 (t, *J* = 7.6 Hz, 1H), 7.39 (tt, *J* = 7.2, 1.6 Hz, 1H), 7.34 (tdd, *J* = 7.2, 2.8, 0.8 Hz, 1H), 7.16 (ddd, *J* = 8.4, 5.6, 1.2 Hz, 1H), 7.06 (ddd, *J* = 14.8, 8.0, 2.0 Hz, 1H), 6.97-6.94 (m, 1H), 6.82-6.78 (m, 1H), 4.20-4.12 (m, 1H), 3.93-3.86 (m, 1H), 2.45 (d, *J* = 14.4 Hz, 1H), 2.25 (d, *J* = 14.4 Hz, 1H), 1.79-1.72 (m, 2H), 1.04 (s, 9H), 0.99 (t, *J* = 7.2 Hz, 3H).

<sup>13</sup>C NMR (100 MHz, CDCl<sub>3</sub>): δ 169.9, 163.1 (d, *J*<sub>C-P</sub> = 5.0 Hz), 153.2 (d, *J*<sub>C-P</sub> = 5.0 Hz), 135.0 (d, *J*<sub>C-P</sub> = 3.0 Hz), 134.1 (d, *J*<sub>C-P</sub> = 3.0 Hz), 132.9 (d, *J*<sub>C-P</sub> = 4.0 Hz), 131.7 (d, *J*<sub>C-P</sub> = 10.0 Hz), 125.6 (d, *J*<sub>C-P</sub> = 12.0 Hz), 124.0 (d, *J*<sub>C-P</sub> = 8.0 Hz), 123.5 (d, *J*<sub>C-P</sub> = 146.0 Hz), 119.6 (d, *J*<sub>C-P</sub> = 14.0 Hz), 117.9 (d, *J*<sub>C-P</sub> = 10.0 Hz), 111.3 (d, *J*<sub>C-P</sub> = 132.0 Hz), 67.0 (d, *J*<sub>C-P</sub> = 6.0 Hz), 46.9, 30.9, 29.7, 23.9 (d, *J*<sub>C-P</sub> = 7.0 Hz), 10.3.

<sup>31</sup>P NMR (162 MHz, CDCl<sub>3</sub>): δ 35.3.

HRMS (ESI) *m/z*: [M+Na]<sup>+</sup> Calcd for C<sub>21</sub>H<sub>27</sub>NaO<sub>5</sub>P<sup>+</sup> 413.1488, found 413.1489.

**(S)-2-((2-hydroxyphenyl)(phenyl)phosphoryl)phenyl 3,3-dimethylbutanoate (3ia)**

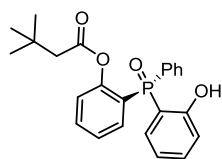

**Prepared according to general procedure E** using chiral ArPNO **C2a** (24  $\mu$ L, 0.005 mmol, 0.05 mol%), bis(2-hydroxyphenyl)(phenyl)phosphine oxide **1h** (31.0 mg, 0.1 mmol),  $\text{Na}_2\text{CO}_3$  (10.6 mg, 0.1 mmol), were added in toluene (2 mL). Then, the 3,3-dimethylbutanoyl chloride **2a** (14.9  $\mu$ L, 0.1 mmol) was added in mixture at 0  $^\circ\text{C}$  for 2 h. Purification by flash column chromatography using gradient elution to give the title product **3ha** as a white solid (34.3 mg, 84% yield, 12% ee). The eluents were pure Pet and Pet/EtOAc (10/1, v/v), respectively.

$R_f = 0.45$  (Pet/EtOAc, 2/1, v/v). m.p: 134.9-136.4  $^\circ\text{C}$ .

**HPLC** analysis: 12% ee (IC, 2-propanol/*n*-hexane = 30/70, flow rate = 0.8 mL/min;  $\lambda = 256$  nm)  $t_R = 16.1$  min (major), 23.2 min (minor).

$[\alpha]_D^{22} = -18.3$  ( $c$  0.42,  $\text{CHCl}_3$ ).

**$^1\text{H}$  NMR** (600 MHz,  $\text{CDCl}_3$ ):  $\delta$  11.19 (s, 1H), 7.74-7.71 (m, 2H), 7.62-7.57 (m, 2H), 7.50 (td,  $J = 7.8, 3.0$  Hz 2H), 7.42-7.38 (m, 2H), 7.28-7.26 (m, 2H), 7.03 (ddd,  $J = 13.8, 7.8, 1.8$  Hz 1H), 6.98 (dd,  $J = 8.4, 4.8$  Hz 1H), 6.83 (td,  $J = 7.2, 2.4$  Hz 1H), 1.93 (dd,  $J = 17.4, 14.4$  Hz 2H), 0.95 (s, 9H).

**$^{13}\text{C}$  NMR** (100 MHz,  $\text{CDCl}_3$ ):  $\delta$  169.6, 163.9 (d,  $J_{C-P} = 3.0$  Hz), 153.0 (d,  $J_{C-P} = 1.0$  Hz), 134.5 (d,  $J_{C-P} = 2.0$  Hz), 134.3 (d,  $J_{C-P} = 2.0$  Hz), 134.2 (d,  $J_{C-P} = 5.0$  Hz), 132.6 (d,  $J_{C-P} = 3.0$  Hz), 131.7 (d,  $J_{C-P} = 107.0$  Hz), 131.7 (d,  $J_{C-P} = 11.0$  Hz), 131.4 (d,  $J_{C-P} = 10.0$  Hz), 129.0 (d,  $J_{C-P} = 13.0$  Hz), 125.7 (d,  $J_{C-P} = 12.0$  Hz), 124.3 (d,  $J_{C-P} = 7.0$  Hz), 124.2 (d,  $J_{C-P} = 103.0$  Hz), 119.2 (d,  $J_{C-P} = 13.0$  Hz), 118.8 (d,  $J_{C-P} = 8.0$  Hz), 110.9 (d,  $J_{C-P} = 106.0$  Hz), 46.6, 30.6, 29.5.

**$^{31}\text{P}$  NMR** (162 MHz,  $\text{CDCl}_3$ ):  $\delta$  37.0.

**HRMS (ESI)**  $m/z$ :  $[\text{M}+\text{Na}]^+$  Calcd for  $\text{C}_{24}\text{H}_{25}\text{NaO}_4\text{P}^+$  431.1383, found 431.1388.

**(methoxyphosphoryl)bis(2,1-phenylene) bis(3,3-dimethylbutanoate) (4aa)**

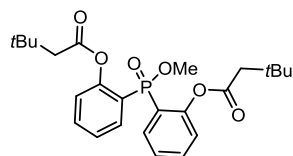

$R_f = 0.24$  (Pet/EtOAc, 2/1, v/v). m.p: 132.9-133.5  $^\circ\text{C}$ .

**$^1\text{H}$  NMR** (400 MHz,  $\text{CDCl}_3$ ):  $\delta$  8.00 (ddd,  $J = 13.2, 7.6, 1.6$  Hz 2H), 7.60-7.55 (m, 2H), 7.36 (tdd,  $J = 7.6, 2.8, 1.2$  Hz 2H), 7.12 (ddd,  $J = 8.0, 5.6, 0.8$  Hz 2H), 3.67 (d,  $J = 11.6$  Hz 3H), 2.15 (dd,  $J = 34.8, 14.4$  Hz 4H), 1.01 (s, 18H).

**$^{13}\text{C}$  NMR** (100 MHz,  $\text{CDCl}_3$ ):  $\delta$  170.0, 152.4 (d,  $J_{C-P} = 3.5$  Hz), 134.1 (d,  $J_{C-P} = 6.1$  Hz), 133.8 (d,  $J_{C-P} = 2.1$  Hz), 125.6 (d,  $J_{C-P} = 12.2$  Hz), 123.9 (d,  $J_{C-P} = 140.1$  Hz), 123.8 (d,  $J_{C-P} = 8.0$  Hz), 51.7 (d,  $J_{C-P} = 5.7$  Hz), 47.0, 30.7, 29.6.

**$^{31}\text{P}$  NMR** (162 MHz,  $\text{CDCl}_3$ ):  $\delta$  25.0.

**HRMS (ESI)**  $m/z$ :  $[\text{M}+\text{Na}]^+$  Calcd for  $\text{C}_{25}\text{H}_{33}\text{NaO}_6\text{P}^+$  483.1907, found 483.1908.

**(S)-3-(2-(Cyclohexylcarbamoyl)pyrrolidin-1-yl)-4-(3,5-di-tert-butylphenyl)pyridine 1-oxide (C21)**

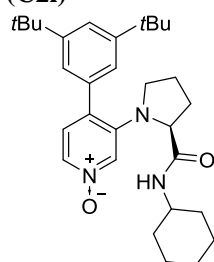

Light yellow solid, m. p. = 111.2-113.5 °C.

R<sub>f</sub> = 0.21 (DCM/MeOH, 20/1, v/v).

[α]<sub>D</sub><sup>25</sup> = -31.0 (c = 0.50, CHCl<sub>3</sub>).

<sup>1</sup>H NMR (400 MHz, CDCl<sub>3</sub>) δ 8.07 (d, *J* = 1.6 Hz, 1H), 7.83 (dd, *J* = 6.4, 1.6 Hz, 1H), 7.41 (t, *J* = 2.0 Hz, 1H), 7.24 (d, *J* = 2.0 Hz, 2H), 7.07 (d, *J* = 6.4 Hz, 1H), 6.16 (d, *J* = 8.4 Hz, 1H), 3.87 (t, *J* = 6.8 Hz, 1H), 3.56-3.68 (m, 1H), 3.07-3.19 (m, 1H), 2.74-2.87 (m, 1H), 2.17-2.27 (m, 1H), 1.79-1.96 (m, 2H), 1.66-1.78 (m, 3H), 1.49-1.65 (m, 3H), 1.34 (s, 18H), 1.22-1.31 (m, 2H), 0.82-1.08 (m, 3H).

<sup>13</sup>C NMR (100 MHz, CDCl<sub>3</sub>): δ 170.6, 151.5, 144.7, 137.5, 131.2, 130.7, 128.8, 127.9, 122.6, 122.0, 63.1, 53.0, 47.9, 35.1, 33.18, 33.16, 31.6, 31.2, 25.5, 24.9, 24.82, 24.80.

HRMS (ESI) *m/z*: [M+H]<sup>+</sup> Calcd for C<sub>30</sub>H<sub>44</sub>N<sub>3</sub>O<sub>2</sub><sup>+</sup> 478.3428; found 478.3426.

## Late-stage functionalization of drugs.<sup>a</sup>

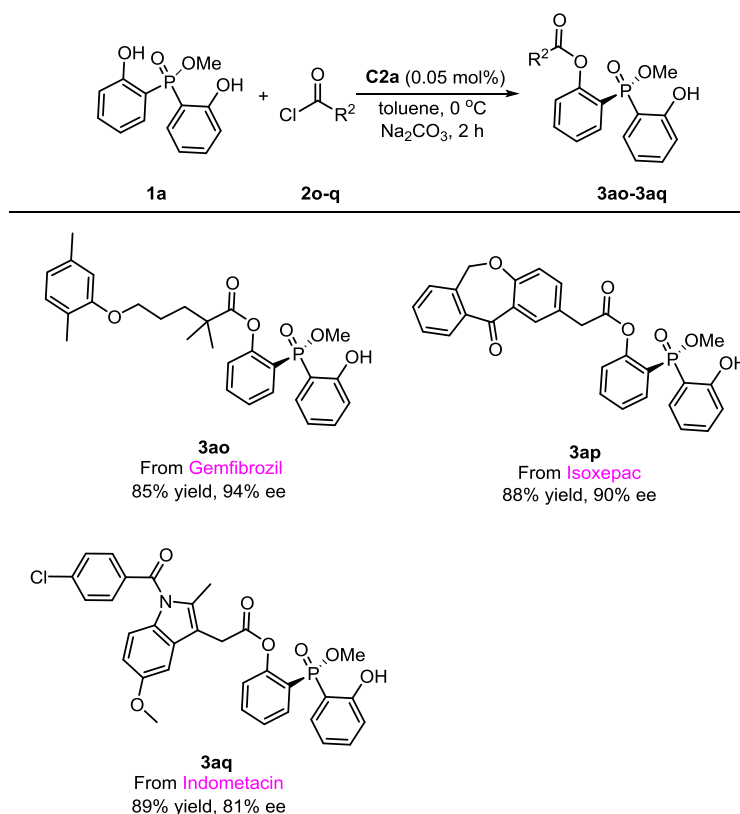

<sup>a</sup>Reaction conditions unless specified otherwise: **1a** (0.1 mmol), **2o-2q** (0.1 mmol), **C2a** (0.05 mol%), and  $\text{Na}_2\text{CO}_3$  (1.0 equiv) in toluene (1 mL) at 0 °C for 2 h. Isolated yields are reported. The ee values are determined by chiral HPLC analysis.

### (*S*)-2-((2-Hydroxyphenyl)(methoxy)phosphoryl)phenyl 5-(2,5-dimethylphenoxy)-2,2-dimethyl pentanoate (**3ao**)

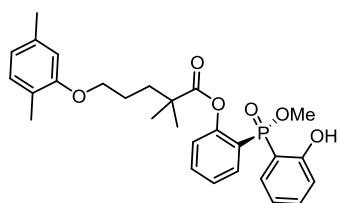

**Prepared according to general procedure E** using chiral ArPNO **C2a** (24  $\mu\text{L}$ , 0.005 mmol, 0.05 mol%), methyl bis(2-hydroxyphenyl)phosphinate **1a** (26.4 mg, 0.1 mmol),  $\text{Na}_2\text{CO}_3$  (10.6 mg, 0.1 mmol), were added in toluene (2 mL). Then, the 5-(2,5-dimethylphenoxy)-2,2-dimethylpentanoyl chloride **2o** (26.8 mg, 0.1 mmol) was added in mixture at 0 °C for 2 h. Purification by flash column chromatography using gradient elution to give the title product **3ao** as a white solid (42.2 mg, 85% yield, 93% ee). The eluents were pure Pet and Pet/EtOAc (10/1, v/v), respectively.

$R_f$  = 0.45 (Pet/EtOAc, 2/1, v/v). m.p: 107.9-108.4 °C.

**HPLC** analysis: 93% ee (IA, 2-propanol/*n*-hexane = 20/80, flow rate = 0.6 mL/min;  $\lambda$  = 256 nm)  $t_R$  = 25.8 min (major), 23.4 min (minor).

$[\alpha]_D^{22} = -176.3$  (*c* 0.32, CHCl<sub>3</sub>).

<sup>1</sup>H NMR (400 MHz, CDCl<sub>3</sub>): δ 10.83 (s, 1H), 7.87 (ddd, *J* = 13.2, 8.0, 2.0 Hz, 1H), 7.61-7.56 (m, 1H), 7.40 (tt, *J* = 7.2, 1.6 Hz, 1H), 7.34 (tdd, *J* = 7.6, 2.8, 1.2 Hz, 1H), 7.12-7.07 (m, 2H), 7.00-6.94 (m, 2H), 6.85-6.81 (m, 1H), 6.66 (d, *J* = 7.6 Hz, 1H), 6.61 (br, 1H), 3.94-3.92 (m, 2H), 3.77 (d, *J* = 11.6 Hz, 3H), 2.30 (s, 3H), 2.15 (s, 3H), 1.83-1.77 (m, 4H), 1.34 (s, 3H), 1.29 (m, 3H).

<sup>13</sup>C NMR (150 MHz, CDCl<sub>3</sub>): δ 176.0, 163.3 (d, *J*<sub>C-P</sub> = 4.4 Hz), 157.0, 153.6 (d, *J*<sub>C-P</sub> = 3.2 Hz), 136.6, 135.2, 134.5, 133.8 (d, *J*<sub>C-P</sub> = 6.3 Hz), 131.6 (d, *J*<sub>C-P</sub> = 10.8 Hz), 130.4, 125.7 (d, *J*<sub>C-P</sub> = 12.0 Hz), 124.0 (d, *J*<sub>C-P</sub> = 7.8 Hz), 123.7, 122.5 (d, *J*<sub>C-P</sub> = 144.5 Hz), 120.8, 119.7 (d, *J*<sub>C-P</sub> = 13.2 Hz), 118.1 (d, *J*<sub>C-P</sub> = 9.6 Hz), 112.1, 110.4 (d, *J*<sub>C-P</sub> = 132.3 Hz), 67.9, 51.8 (d, *J*<sub>C-P</sub> = 5.6 Hz), 42.7, 37.0, 25.0, 25.0 (d, *J*<sub>C-P</sub> = 43.5 Hz), 21.5, 15.9.

<sup>31</sup>P NMR (162 MHz, CDCl<sub>3</sub>): δ 39.2.

HRMS (ESI) *m/z*: [M+Na]<sup>+</sup> Calcd for C<sub>28</sub>H<sub>33</sub>NaO<sub>6</sub>P<sup>+</sup> 519.1907, found 519.1904.

**(S)-2-((2-Hydroxyphenyl)(methoxy)phosphoryl)phenyl-2-(11-oxo-6,11-dihydrodibenzo[b,e]oxepin-2-yl)acetate (3ap)**

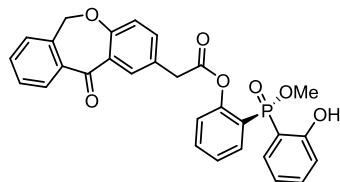

Prepared according to general procedure E using chiral ArPNO C2a (24 μL, 0.005 mmol, 0.05 mol%), methyl bis(2-hydroxyphenyl)phosphinate 1a (26.4 mg, 0.1 mmol), Na<sub>2</sub>CO<sub>3</sub> (10.6 mg, 0.1 mmol), were added in toluene (2 mL). Then, the 2-(11-oxo-6,11-dihydrodibenzo[b,e]oxepin-2-yl)acetyl chloride 2p (28.6 mg, 0.1 mmol) was added in mixture at 0 °C for 2 h. Purification by flash column chromatography using gradient elution to give the title product 3ap as a white solid (45.2 mg, 88% yield, 88% ee). The eluents were pure Pet and Pet/EtOAc (10/1, v/v), respectively.

R<sub>f</sub> = 0.46 (Pet/EtOAc, 2/1, v/v). m.p: 112.9-114.4 °C.

HPLC analysis: 88% ee (AD-H, 2-propanol/*n*-hexane = 30/70, flow rate = 0.8 mL/min; λ = 256 nm) t<sub>R</sub> = 33.1 min (major), 46.9 min (minor).

$[\alpha]_D^{22} = -121.3$  (*c* 0.32, CHCl<sub>3</sub>).

<sup>1</sup>H NMR (600 MHz, CDCl<sub>3</sub>): δ 11.04 (s, 1H), 8.10 (d, *J* = 2.4 Hz, 1H), 7.95 (ddd, *J* = 12.6, 7.8, 1.8 Hz, 1H), 7.88 (dd, *J* = 7.8, 1.2 Hz, 1H), 7.58-7.54 (m, 2H), 7.48-7.44 (m, 2H), 7.41 (dd, *J* = 8.4, 2.4 Hz, 1H), 7.37-7.34 (m, 2H), 7.14 (dd, *J* = 8.4, 5.4 Hz, 1H), 7.09-7.01 (m, 3H), 6.86-6.83 (m, 1H), 5.17 (s, 2H), 3.90 (d, *J* = 16.8 Hz, 1H), 3.81 (d, *J* = 11.4 Hz, 3H), 3.75 (d, *J* = 16.8 Hz, 1H).

<sup>13</sup>C NMR (100 MHz, CDCl<sub>3</sub>): δ 190.9, 169.4, 163.2 (d, *J*<sub>C-P</sub> = 5.0 Hz), 160.7, 153.0 (d, *J*<sub>C-P</sub> = 3.0 Hz), 140.6, 136.7, 135.6, 135.4 (d, *J*<sub>C-P</sub> = 2.0 Hz), 134.4 (d, *J*<sub>C-P</sub> = 2.0 Hz), 132.9 (d, *J*<sub>C-P</sub> = 5.0 Hz), 132.9 (d, *J*<sub>C-P</sub> = 4.0 Hz), 131.7 (d, *J*<sub>C-P</sub> = 10.0 Hz), 129.5 (d, *J*<sub>C-P</sub> = 20.0 Hz), 127.9, 126.9, 126.0 (d, *J*<sub>C-P</sub> = 12.0 Hz), 125.3, 124.0 (d, *J*<sub>C-P</sub> = 9.0 Hz), 123.0 (d, *J*<sub>C-P</sub> = 146.0 Hz), 121.2, 119.9 (d, *J*<sub>C-P</sub> = 14.0 Hz), 118.1 (d, *J*<sub>C-P</sub> = 10.0 Hz), 110.5 (d, *J*<sub>C-P</sub> = 133.0 Hz), 73.7, 51.9 (d, *J*<sub>C-P</sub> = 5.0 Hz), 39.6.

<sup>31</sup>P NMR (162 MHz, CDCl<sub>3</sub>): δ 37.5.

HRMS (ESI) *m/z*: [M+Na]<sup>+</sup> Calcd for C<sub>29</sub>H<sub>23</sub>NaO<sub>7</sub>P<sup>+</sup> 537.1074, found 537.1075.

**(S)-2-((2-hydroxyphenyl)(methoxy)phosphoryl)phenyl 2-(1-(4-chlorobenzoyl)-5-methoxy-2-methyl-1H-indol-3-yl)acetate (3aq)**

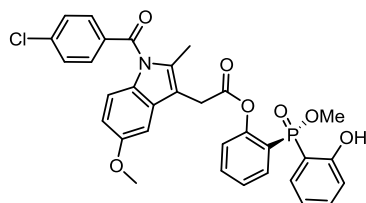

**Prepared according to general procedure E** using chiral ArPNO **C2a** (24  $\mu$ L, 0.005 mmol, 0.05 mol%), methyl bis(2-hydroxyphenyl)phosphinate **1a** (26.4 mg, 0.1 mmol),  $\text{Na}_2\text{CO}_3$  (10.6 mg, 0.1 mmol), were added in toluene (2 mL). Then, the 2-(1-(4-chlorobenzoyl)-5-methoxy-2-methyl-1H-indol-3-yl)acetyl chloride **2q** (37.5 mg, 0.1 mmol) was added in mixture at 0  $^\circ\text{C}$  for 2 h. Purification by flash column chromatography using gradient elution to give the title product **3aq** as a white solid (53.7 mg, 89% yield, 80% ee). The eluents were pure Pet and Pet/EtOAc (10/1, v/v), respectively.

$R_f$  = 0.46 (Pet/EtOAc, 2/1, v/v). m.p: 130.9-131.4  $^\circ\text{C}$ .

**HPLC** analysis: 80% ee (IA, 2-propanol/*n*-hexane = 20/80, flow rate = 0.6 mL/min;  $\lambda$  = 256 nm)  $t_R$  = 34.5 min (major), 42.2 min (minor).

$[\alpha]_D^{22}$  = -66.1 (*c* 0.32,  $\text{CHCl}_3$ ).

**$^1\text{H}$  NMR** (400 MHz,  $\text{CDCl}_3$ ):  $\delta$  11.15 (s, 1H), 7.95 (ddd,  $J$  = 12.4, 7.6, 1.6 Hz, 1H), 7.66-7.62 (m, 2H), 7.58-7.54 (m, 1H), 7.49-7.42 (m, 3H), 7.36 (tdd,  $J$  = 7.6, 2.8, 1.2 Hz, 1H), 7.11-7.05 (m, 2H), 7.03-6.99 (m, 2H), 6.90 (d,  $J$  = 8.8 Hz, 1H), 6.85 (tdd,  $J$  = 7.2, 2.8, 0.8 Hz, 1H), 6.67 (d,  $J$  = 8.8, 2.4 Hz, 1H), 3.95 (d,  $J$  = 16.4 Hz, 1H), 3.83-3.79 (m, 6H), 3.75 (d,  $J$  = 16.4 Hz, 1H), 2.34 (s, 3H)

**$^{13}\text{C}$  NMR** (100 MHz,  $\text{CDCl}_3$ ):  $\delta$  168.8, 168.5, 163.3 (d,  $J_{C-P}$  = 5.0 Hz), 156.3, 153.2 (d,  $J_{C-P}$  = 5.0 Hz), 139.4, 136.5, 135.4, 134.5, 134.0, 132.9 (d,  $J_{C-P}$  = 4.0 Hz), 131.7 (d,  $J_{C-P}$  = 10.0 Hz), 131.3, 131.0, 130.7, 129.3, 126.1 (d,  $J_{C-P}$  = 12.0 Hz), 124.1 (d,  $J_{C-P}$  = 9.0 Hz), 123.0 (d,  $J_{C-P}$  = 146.0 Hz), 119.9 (d,  $J_{C-P}$  = 13.0 Hz), 118.1 (d,  $J_{C-P}$  = 10.0 Hz), 115.1, 112.1, 111.8, 110.6 (d,  $J_{C-P}$  = 133.0 Hz), 101.3, 55.9, 51.9 (d,  $J_{C-P}$  = 5.0 Hz), 29.9 (d,  $J_{C-P}$  = 14.0 Hz), 13.5.

**$^{31}\text{P}$  NMR** (162 MHz,  $\text{CDCl}_3$ ):  $\delta$  37.4.

**HRMS (ESI)**  $m/z$ :  $[\text{M}+\text{Na}]^+$  Calcd for  $\text{C}_{32}\text{H}_{27}\text{ClNaO}_7\text{P}^+$  626.1106, found 626.1115.



## X-ray data of (S)-3aa

**Figure S1.** X-Ray crystal structure of (S)-3aa (The crystal was obtained by slow evaporation of (S)-3aa in a mixture of EtOAc/CH<sub>2</sub>Cl<sub>2</sub>). (CCDC:2290776)

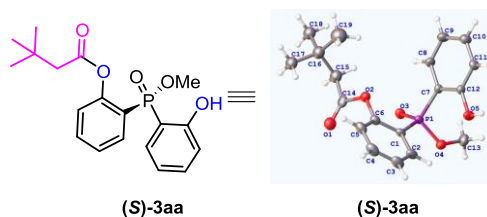

**Table S2. Crystal data and structure refinement for (S)-3aa.**

|                                             |                                                               |
|---------------------------------------------|---------------------------------------------------------------|
| Identification code                         | <b>(S)-3aa</b>                                                |
| Empirical formula                           | C <sub>19</sub> H <sub>23</sub> O <sub>5</sub> P              |
| Formula weight                              | 362.34                                                        |
| Temperature/K                               | 298.1(2)                                                      |
| Crystal system                              | triclinic                                                     |
| Space group                                 | P1                                                            |
| a/Å                                         | 9.0660(2)                                                     |
| b/Å                                         | 9.2370(2)                                                     |
| c/Å                                         | 12.8726(2)                                                    |
| α/°                                         | 92.325(2)                                                     |
| β/°                                         | 96.687(2)                                                     |
| γ/°                                         | 115.494(2)                                                    |
| Volume/Å <sup>3</sup>                       | 961.45(4)                                                     |
| Z                                           | 2                                                             |
| ρ <sub>calc</sub> /cm <sup>3</sup>          | 1.252                                                         |
| μ/mm <sup>-1</sup>                          | 1.482                                                         |
| F(000)                                      | 384.0                                                         |
| Crystal size/mm <sup>3</sup>                | 0.16 × 0.14 × 0.12                                            |
| Radiation                                   | Cu Kα (λ = 1.54184)                                           |
| 2θ range for data collection/°              | 6.95 to 142.484                                               |
| Index ranges                                | -11 ≤ h ≤ 11, -11 ≤ k ≤ 11, -15 ≤ l ≤ 15                      |
| Reflections collected                       | 52356                                                         |
| Independent reflections                     | 6625 [R <sub>int</sub> = 0.0761, R <sub>sigma</sub> = 0.0300] |
| Data/restraints/parameters                  | 6625/514/512                                                  |
| Goodness-of-fit on F <sup>2</sup>           | 1.117                                                         |
| Final R indexes [I ≥ 2σ (I)]                | R <sub>1</sub> = 0.0640, wR <sub>2</sub> = 0.1841             |
| Final R indexes [all data]                  | R <sub>1</sub> = 0.0667, wR <sub>2</sub> = 0.1892             |
| Largest diff. peak/hole / e Å <sup>-3</sup> | 0.54/-0.33                                                    |
| Flack parameter                             | -0.01(3)                                                      |

## HRMS analysis

**Figure S2.** The mixture of **C2a** and acyl chloride **2a** in toluene at 0 °C for 1 h.

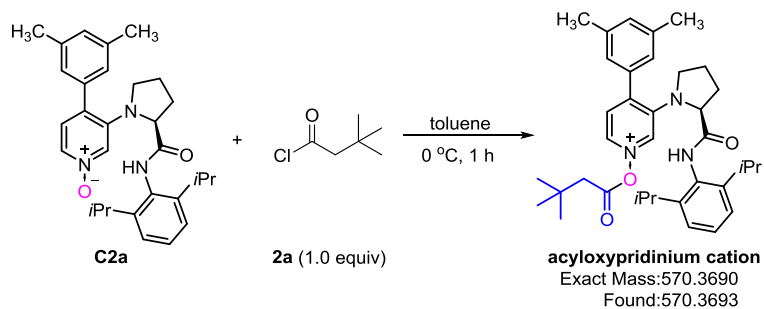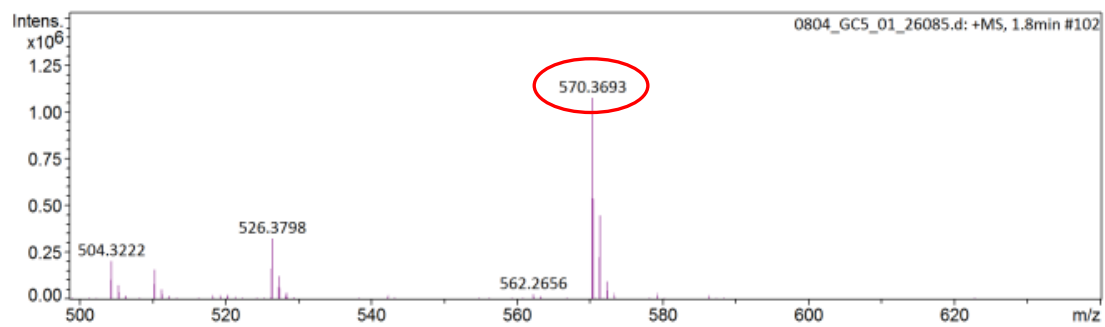

### $^1\text{H-NMR}$ (400 MHz, $\text{CDCl}_3$ ) Spectrum of 3aa

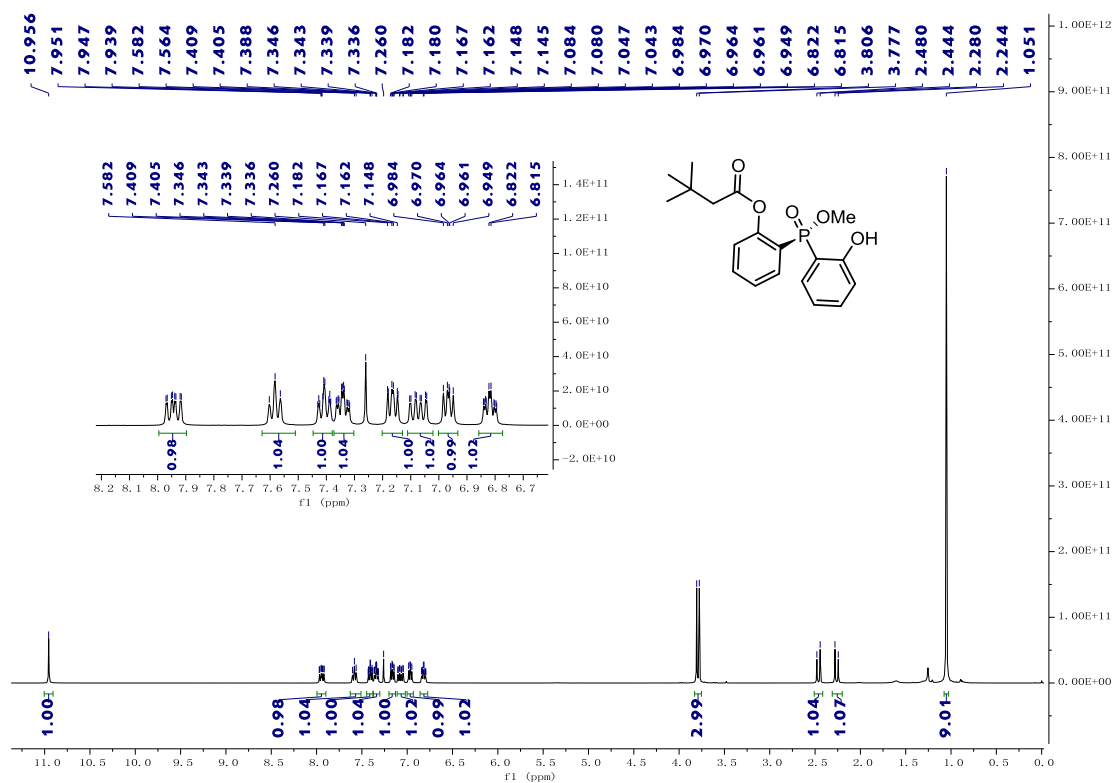

### $^{13}\text{C-NMR}$ (100 MHz, $\text{CDCl}_3$ ) Spectrum of 3aa

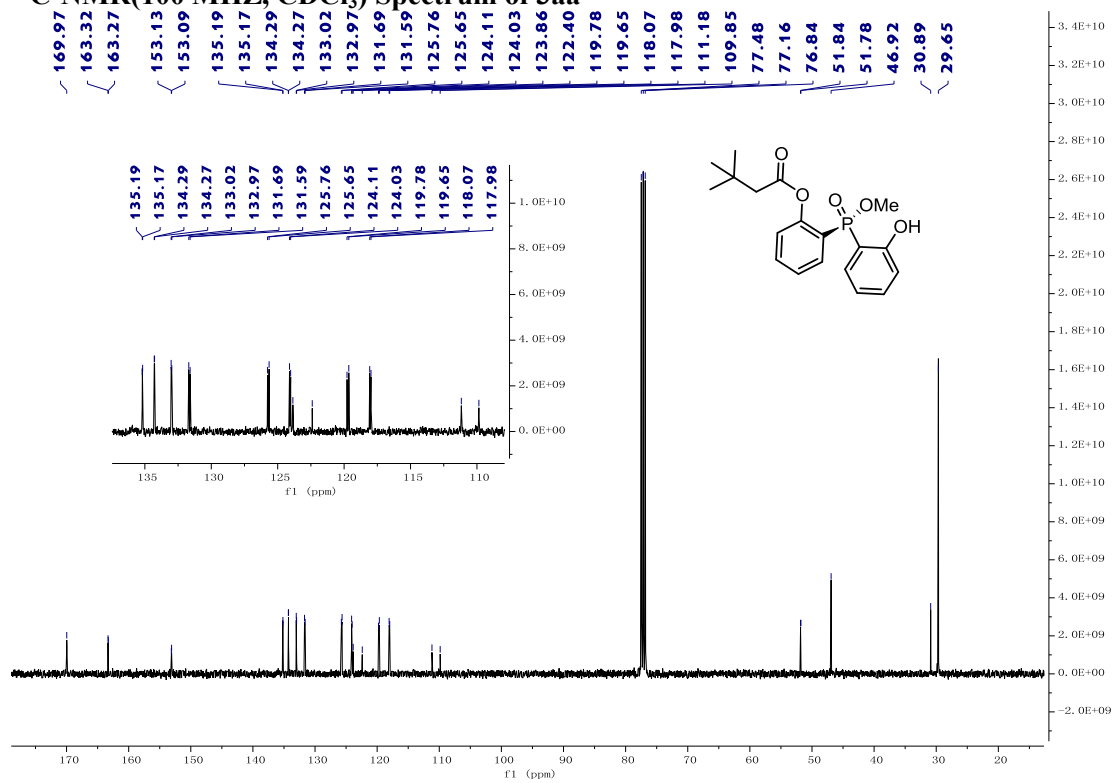

<sup>31</sup>P-NMR(162 MHZ, CDCl<sub>3</sub>) Spectrum of 3aa

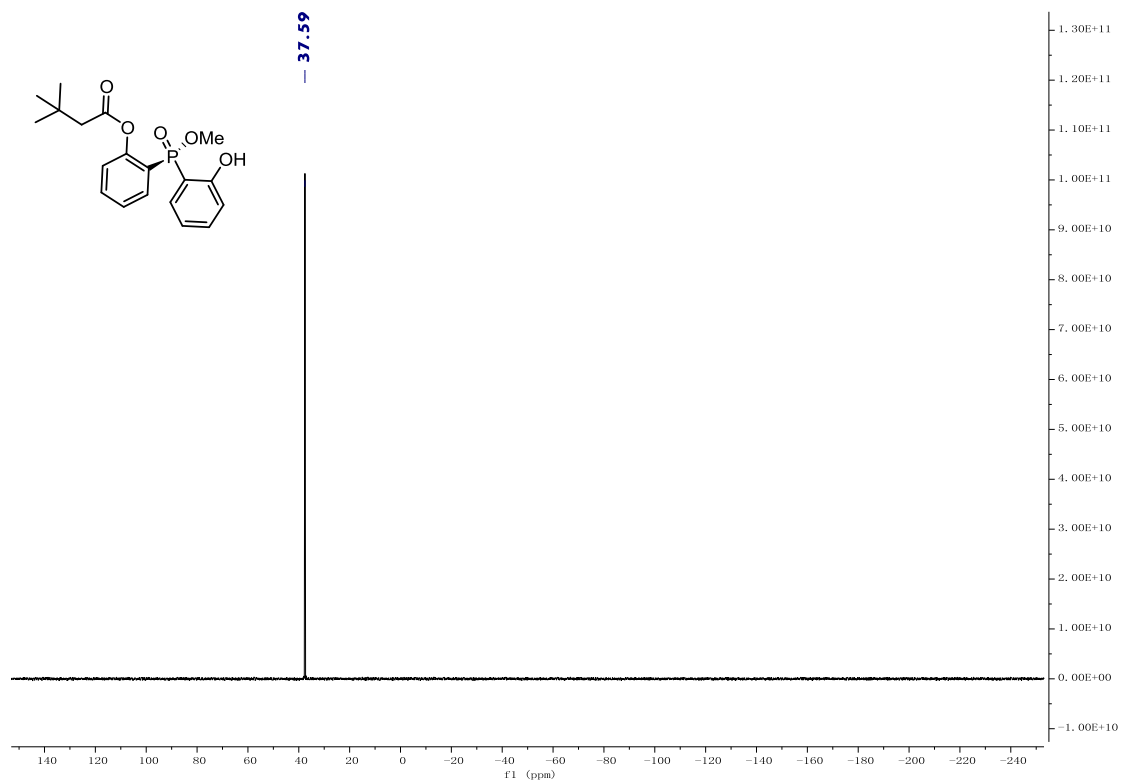

<sup>1</sup>H-NMR(400 MHZ, CDCl<sub>3</sub>) Spectrum of 3ab

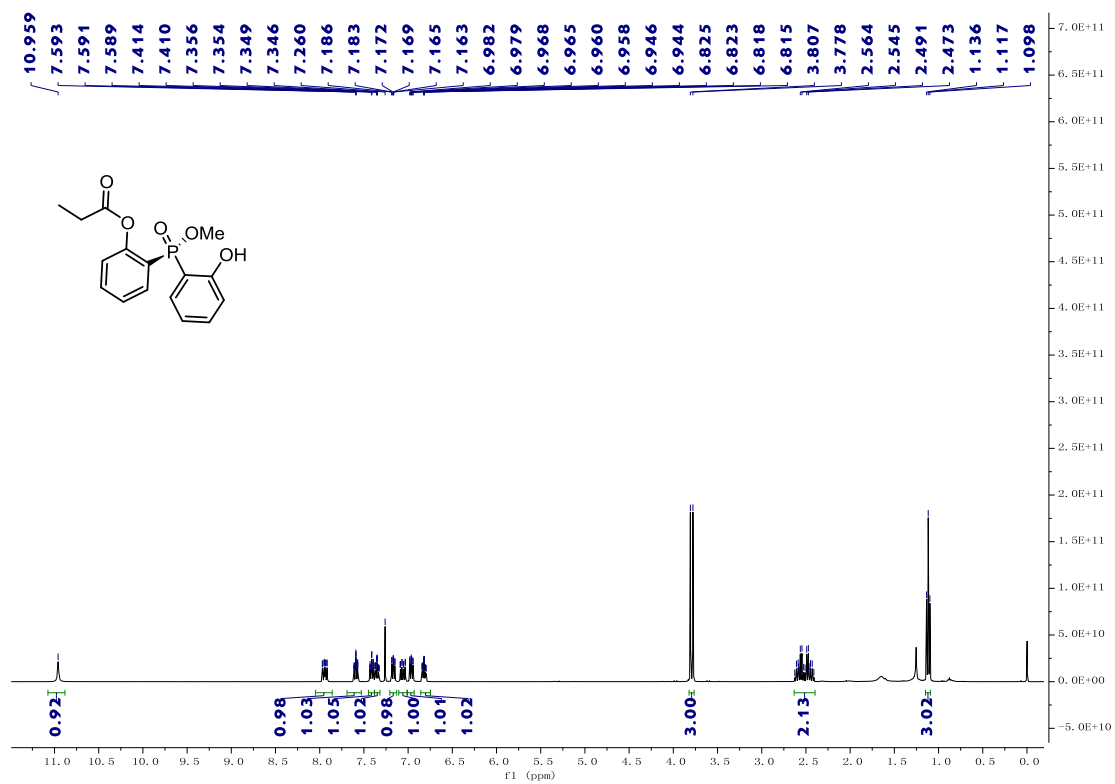

### <sup>13</sup>C-NMR(100 MHZ, CDCl<sub>3</sub>) Spectrum of 3ab

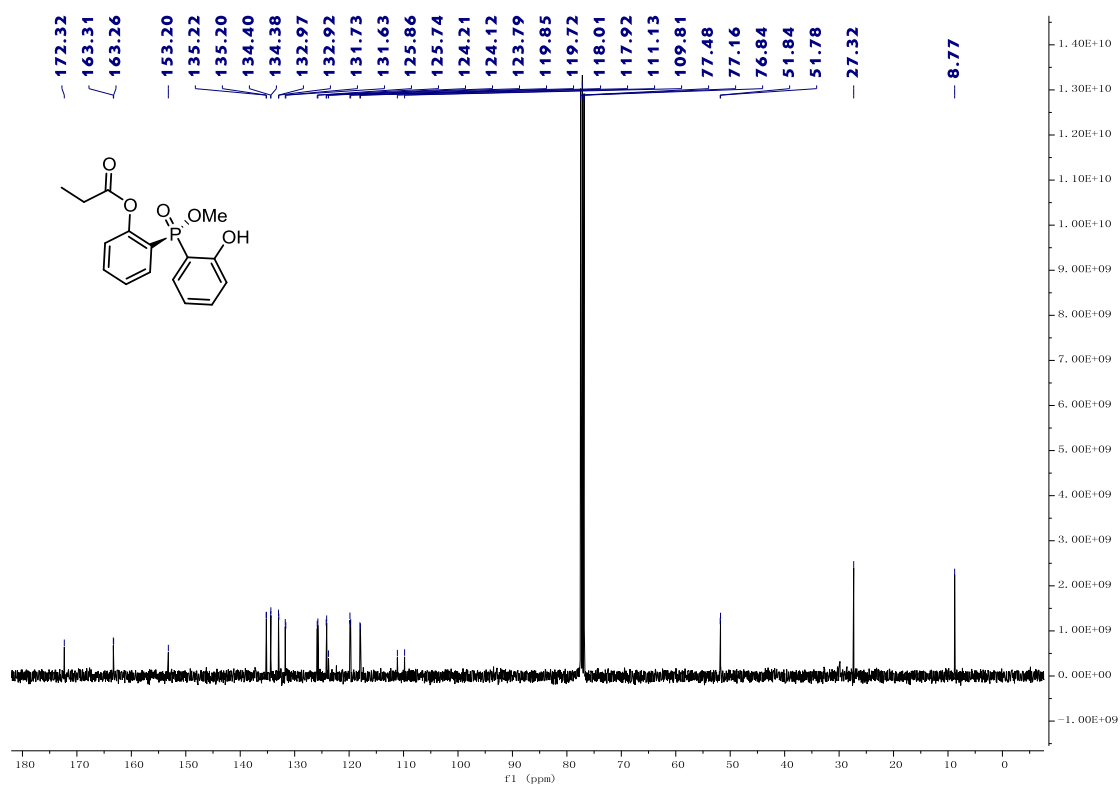

### <sup>31</sup>P-NMR(162 MHZ, CDCl<sub>3</sub>) Spectrum of 3ab

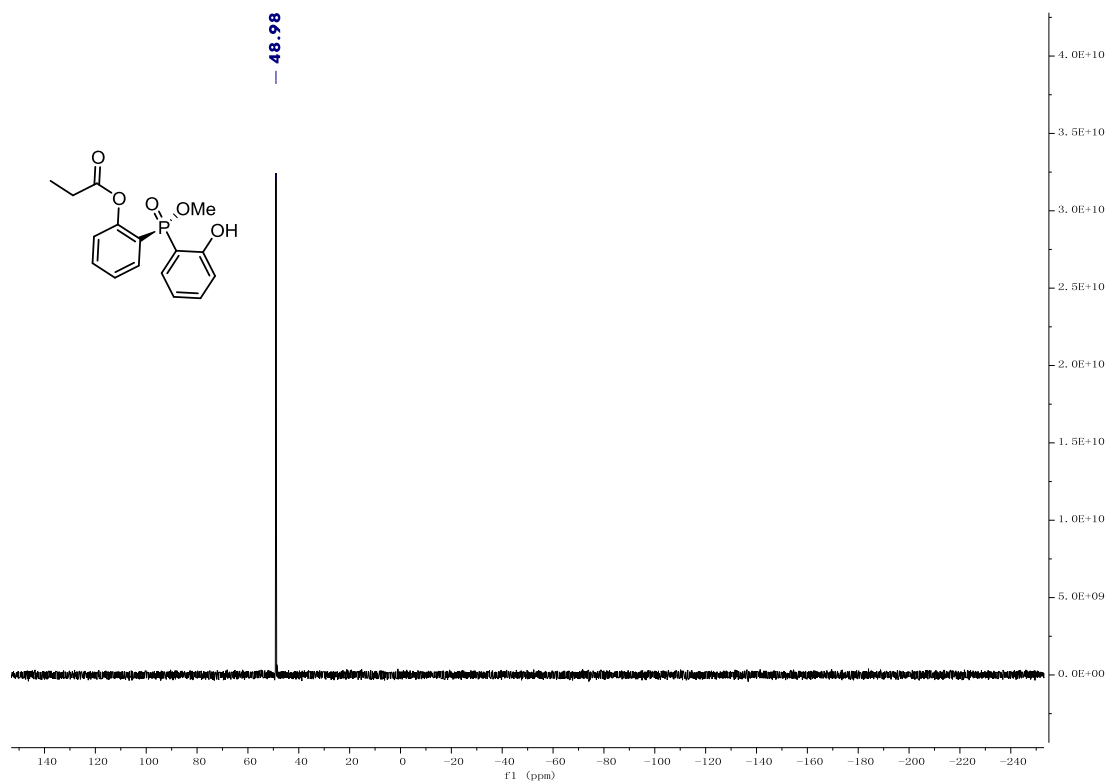

### <sup>1</sup>H-NMR(400 MHZ, CDCl<sub>3</sub>) Spectrum of 3ac

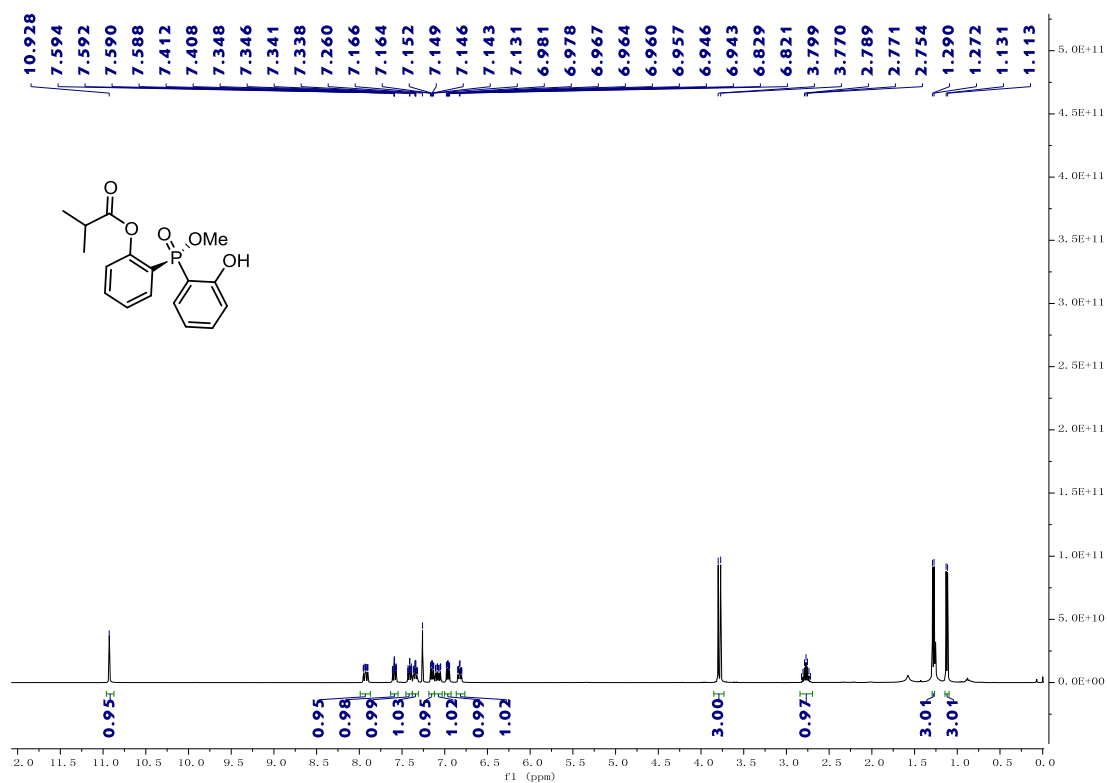

### <sup>13</sup>C-NMR(150 MHZ, CDCl<sub>3</sub>) Spectrum of 3ac

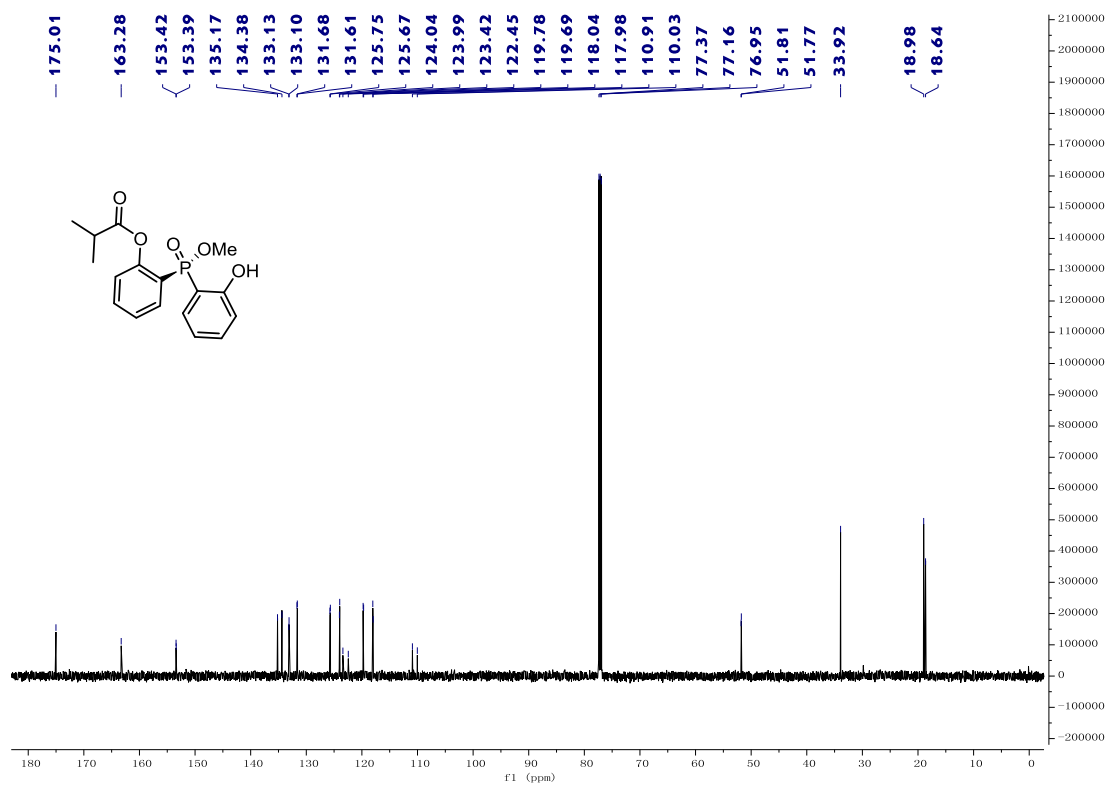

**<sup>31</sup>P-NMR(162 MHZ, CDCl<sub>3</sub>) Spectrum of 3ac**

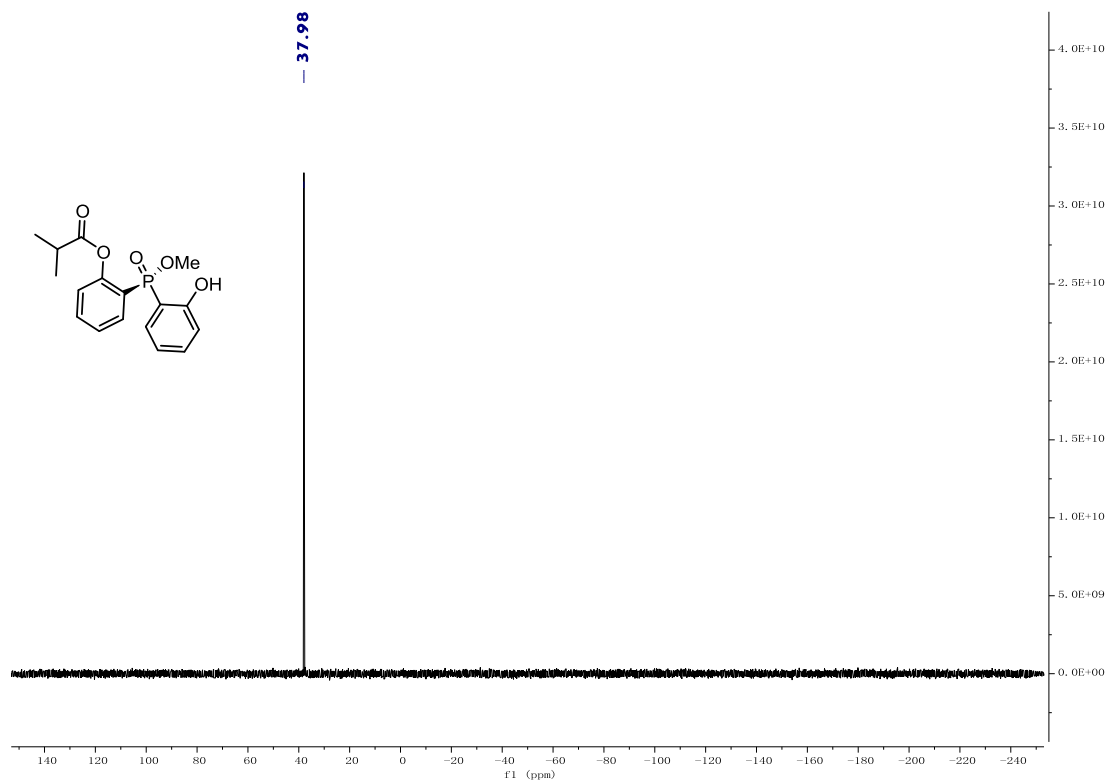

**<sup>1</sup>H-NMR(400 MHZ, CDCl<sub>3</sub>) Spectrum of 3ad**

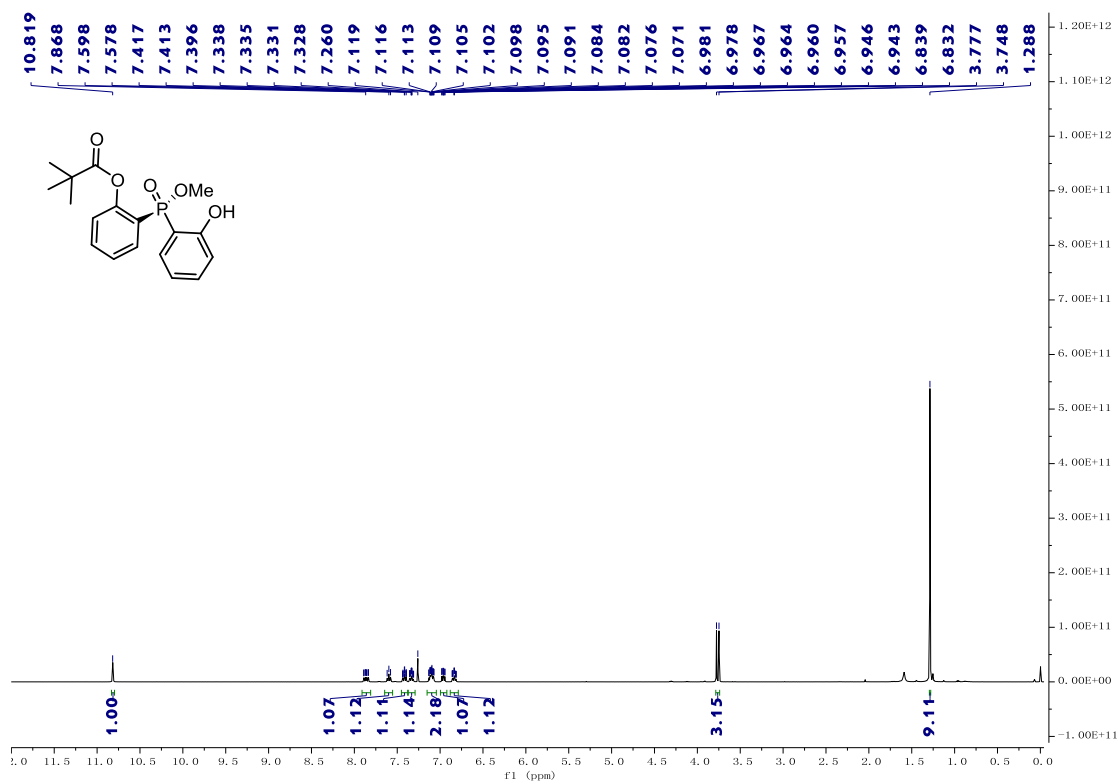

### <sup>13</sup>C-NMR(150 MHz, CDCl<sub>3</sub>) Spectrum of 3ad

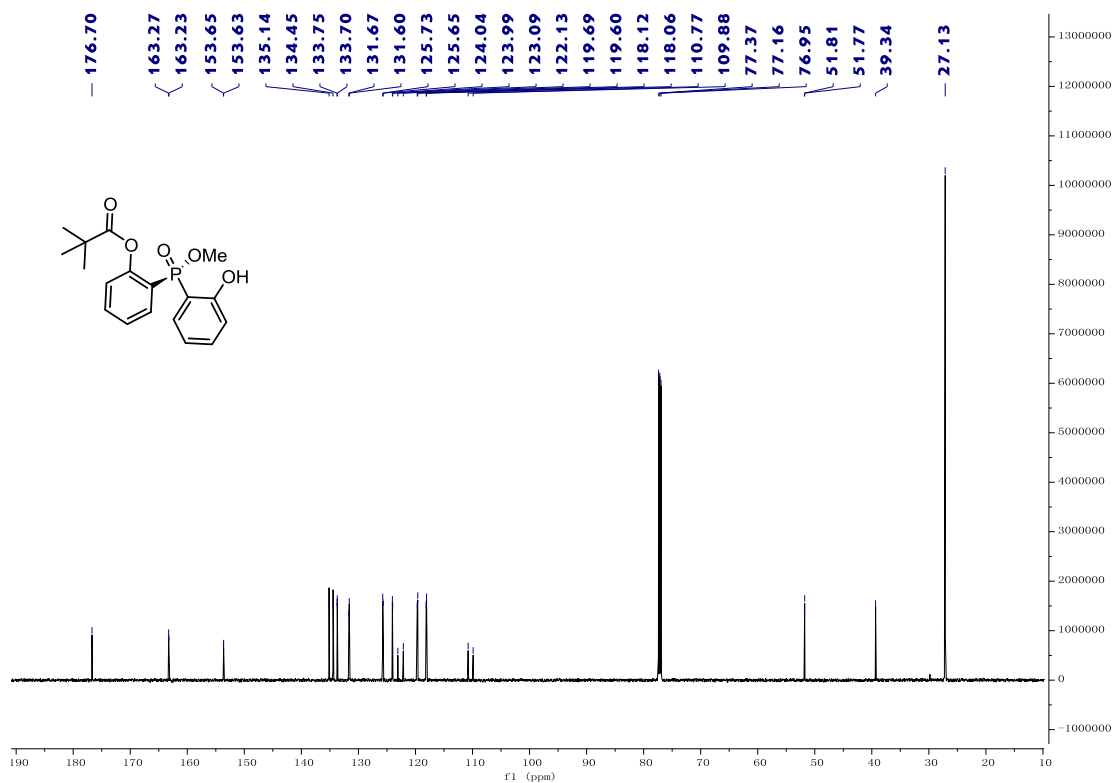

### <sup>31</sup>P-NMR(243 MHz, CDCl<sub>3</sub>) Spectrum of 3ad

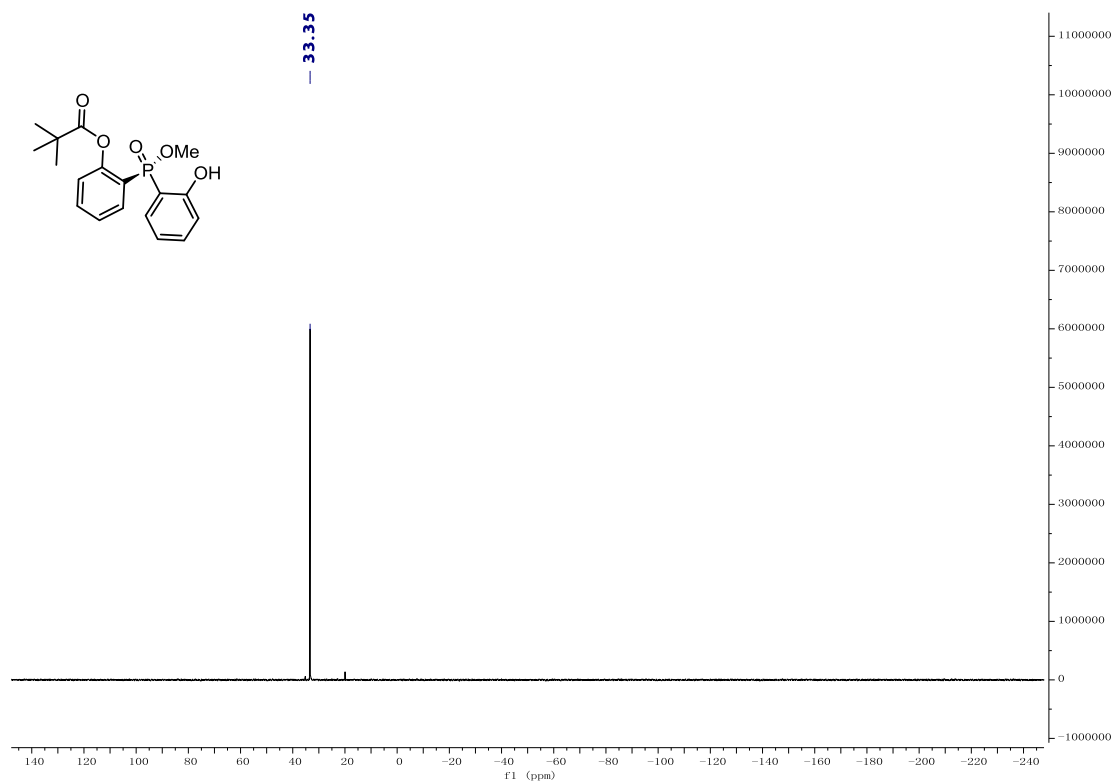



### <sup>1</sup>H-NMR(600 MHZ, CDCl<sub>3</sub>) Spectrum of 3ae

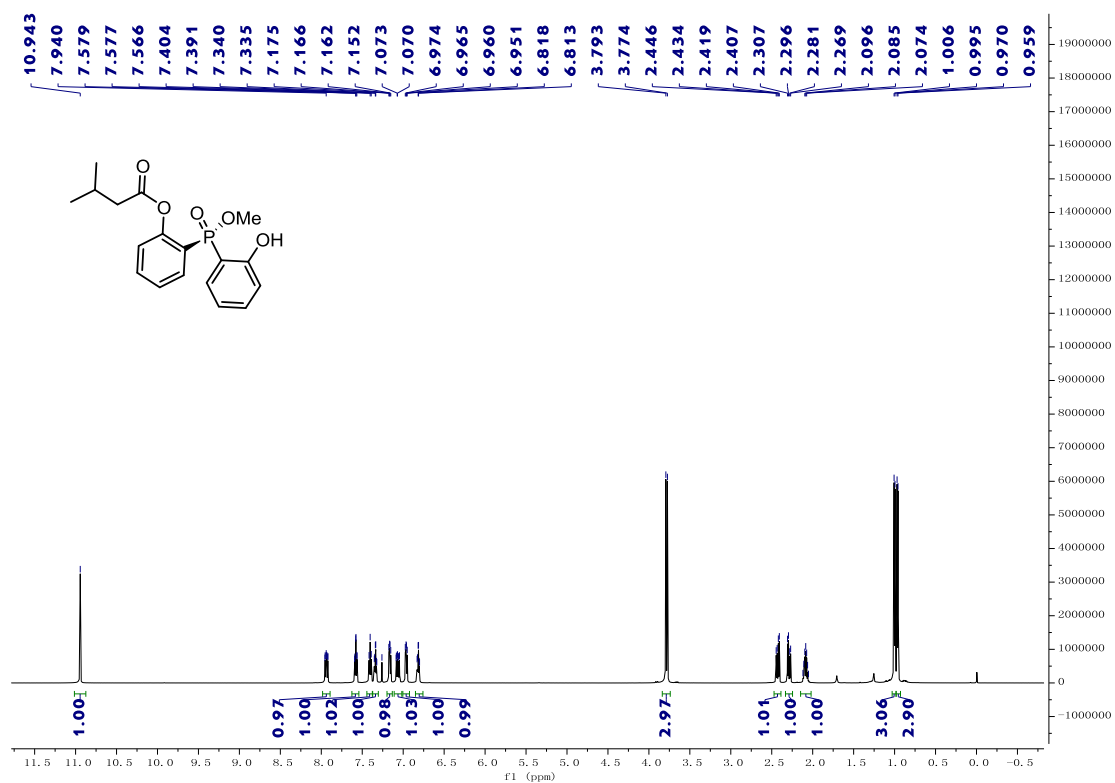

### <sup>13</sup>C-NMR(150 MHZ, CDCl<sub>3</sub>) Spectrum of 3ae

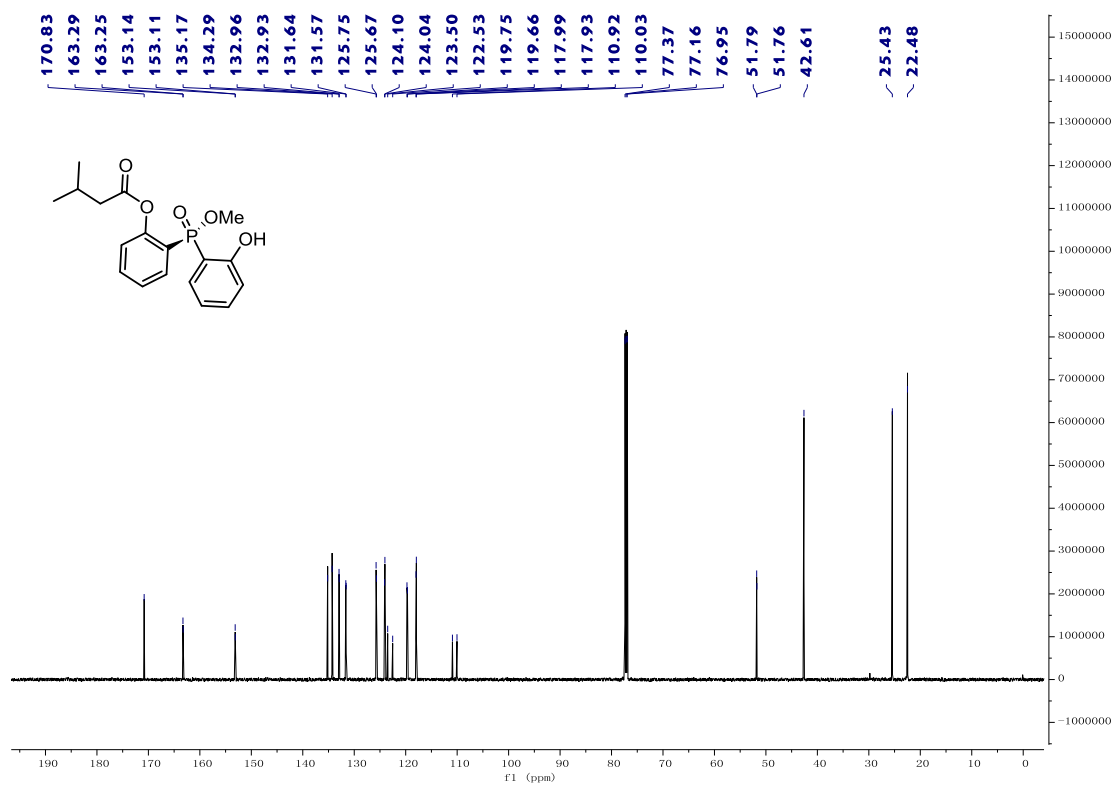

**<sup>31</sup>P-NMR(243 MHZ, CDCl<sub>3</sub>) Spectrum of 3ae**

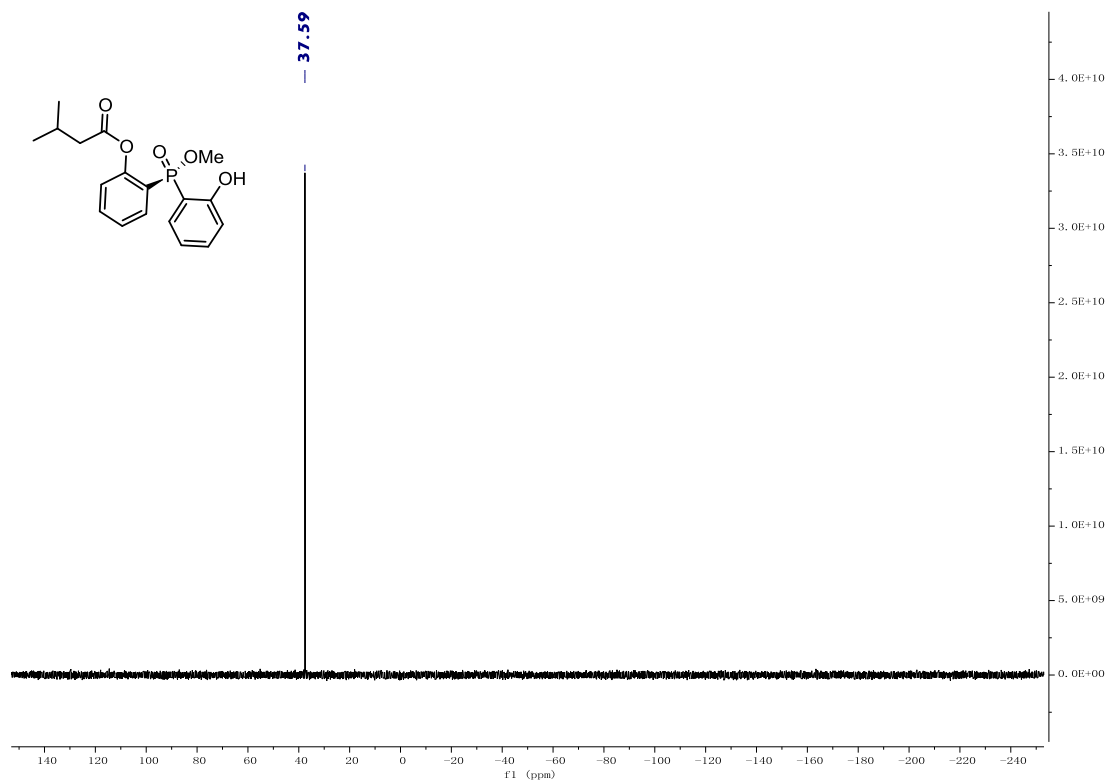

**<sup>1</sup>H-NMR(400 MHZ, CDCl<sub>3</sub>) Spectrum of 3af**

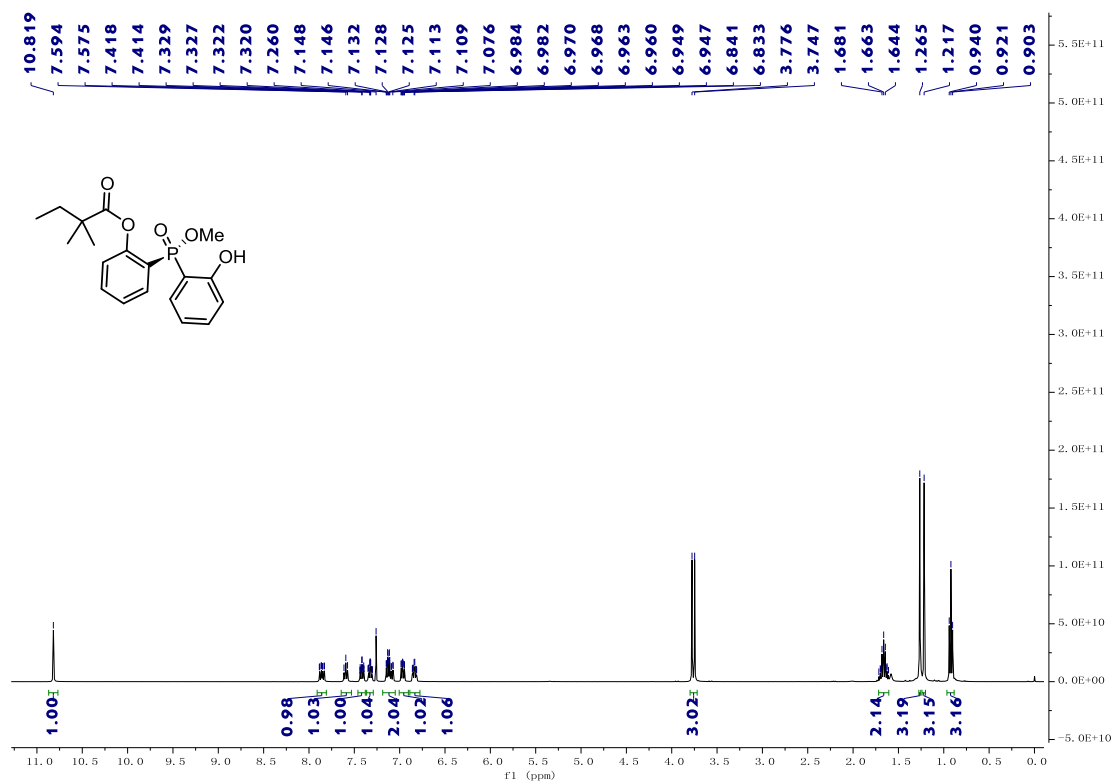

### <sup>13</sup>C-NMR(100 MHZ, CDCl<sub>3</sub>) Spectrum of 3af

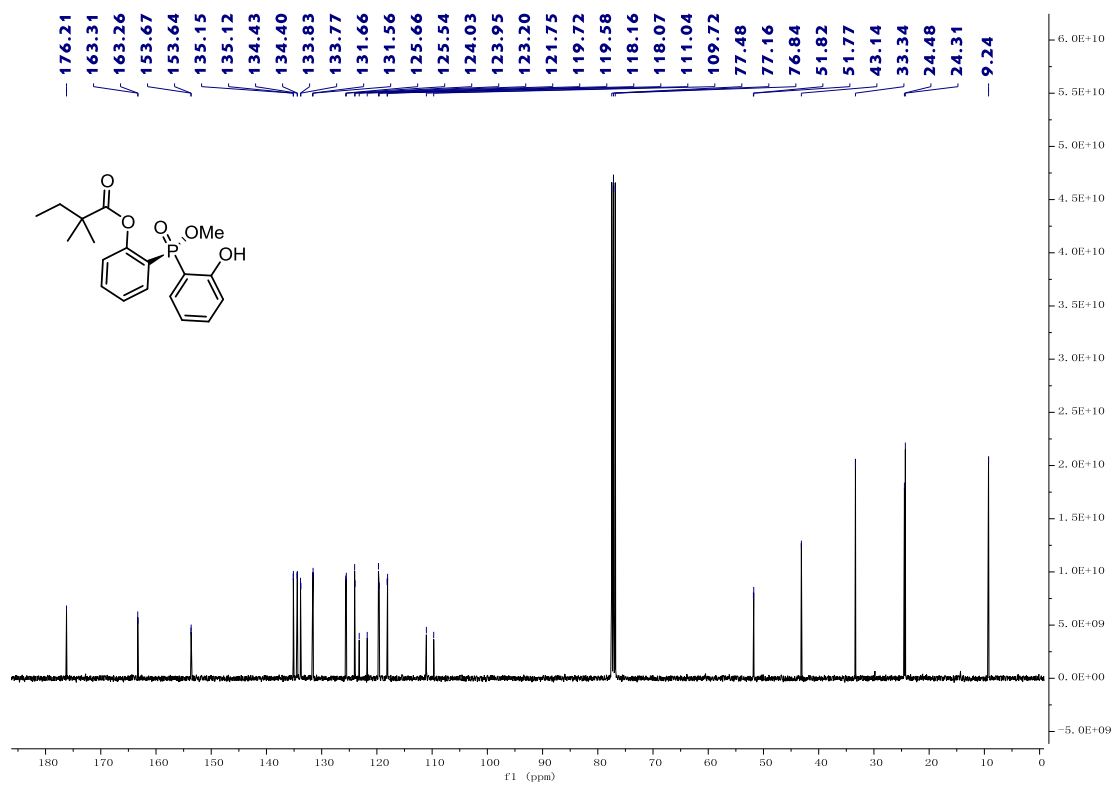

### <sup>31</sup>P-NMR(162 MHZ, CDCl<sub>3</sub>) Spectrum of 3af

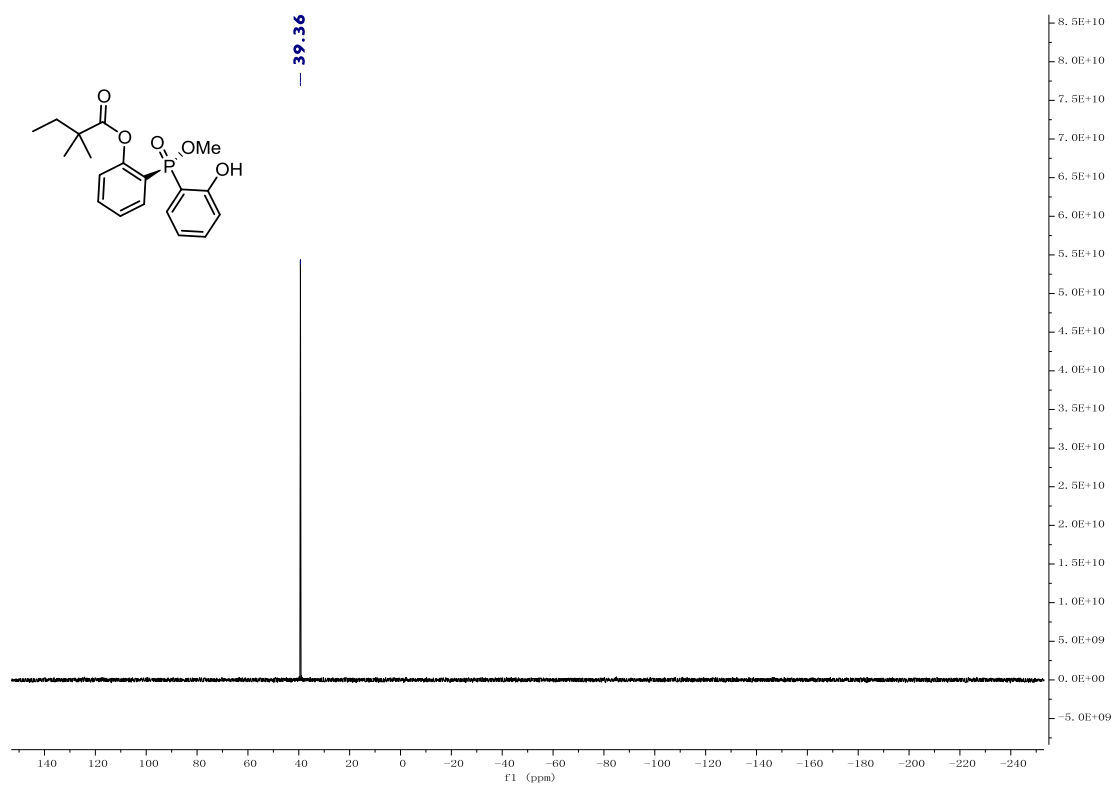

### <sup>1</sup>H-NMR(400 MHZ, CDCl<sub>3</sub>) Spectrum of 3ag

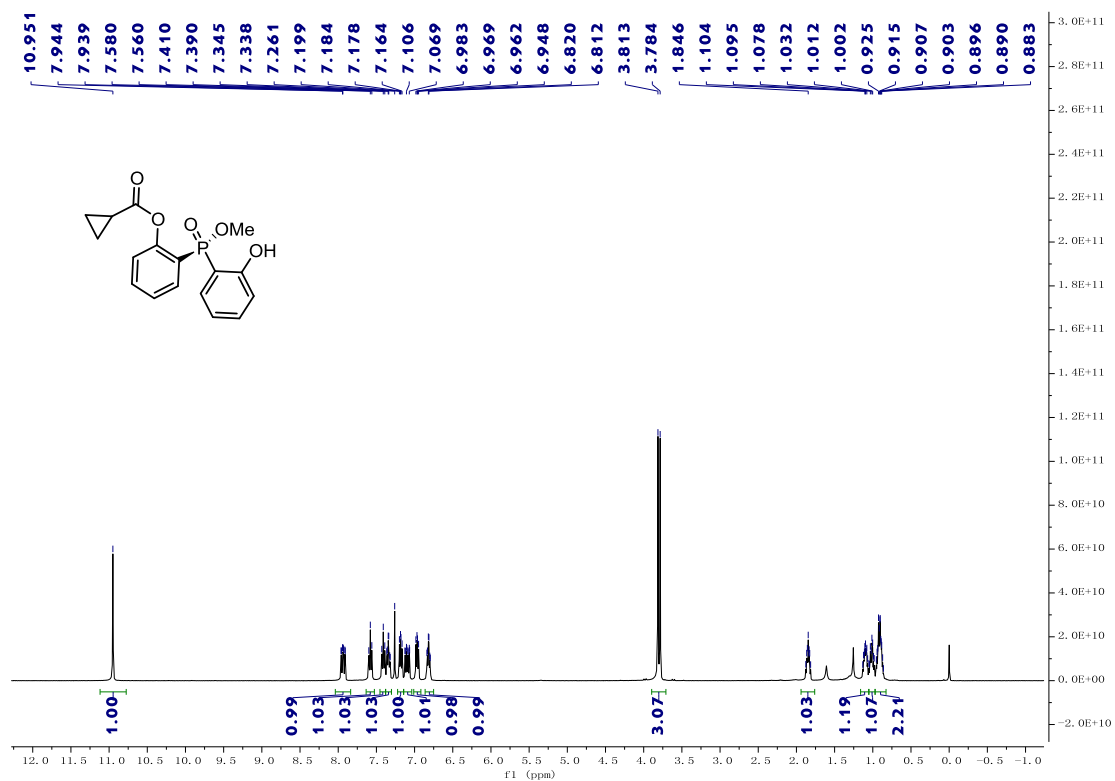

### <sup>13</sup>C-NMR(100 MHZ, CDCl<sub>3</sub>) Spectrum of 3ag

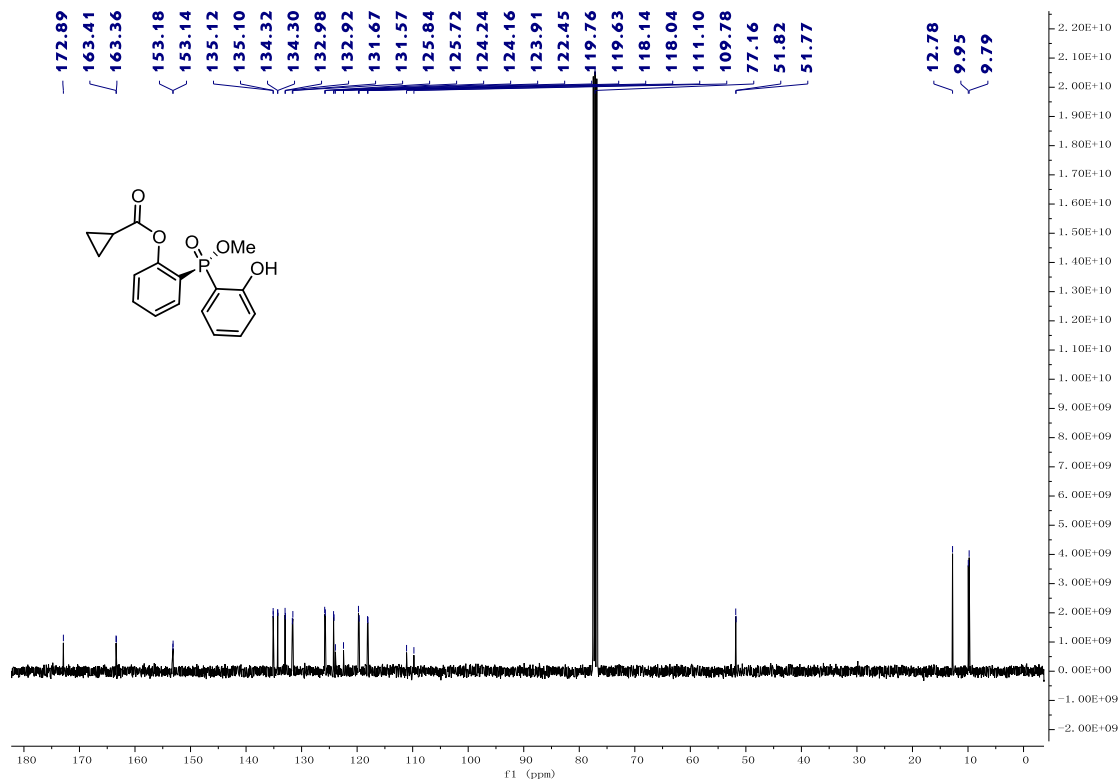

### <sup>31</sup>P-NMR(243 MHZ, CDCl<sub>3</sub>) Spectrum of 3ag

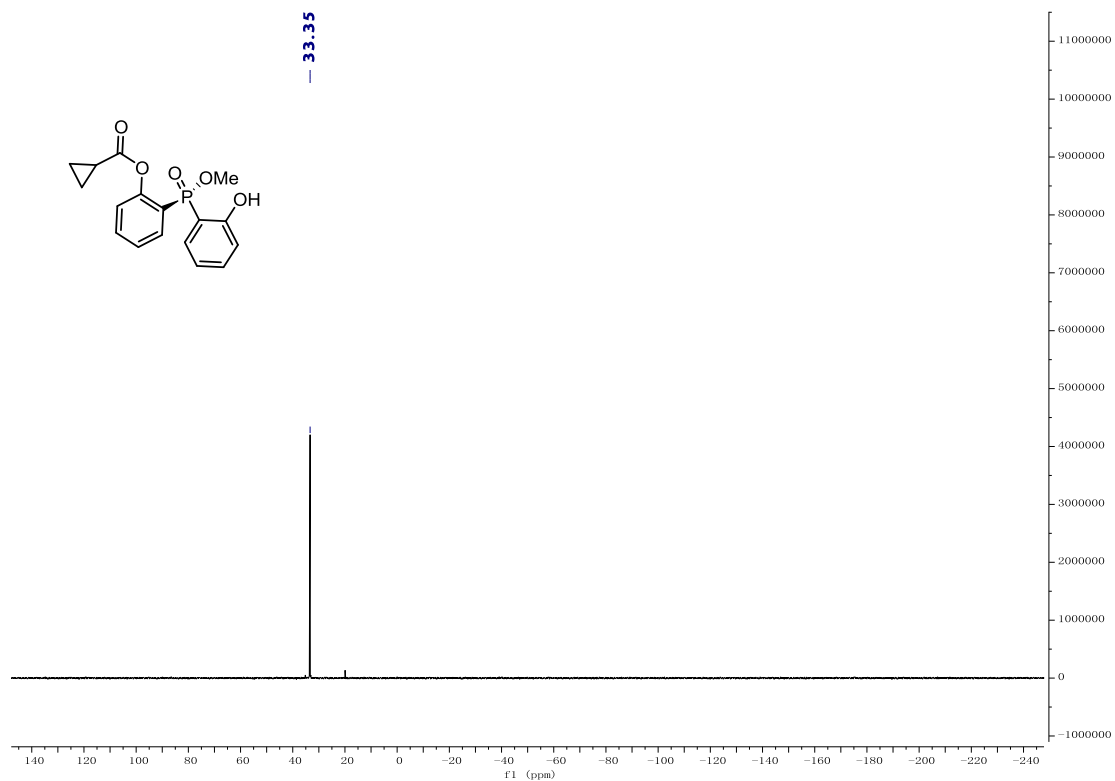

### <sup>1</sup>H-NMR(600 MHZ, CDCl<sub>3</sub>) Spectrum of 3ah

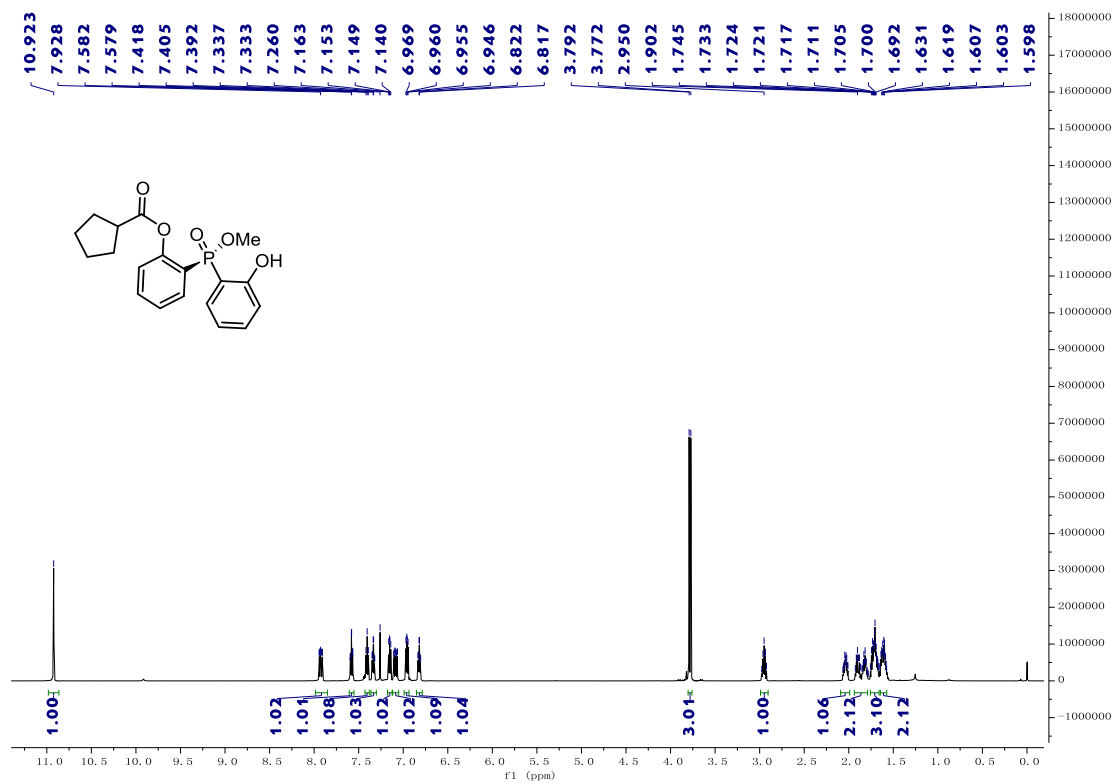

### <sup>13</sup>C-NMR(150 MHZ, CDCl<sub>3</sub>) Spectrum of 3ah

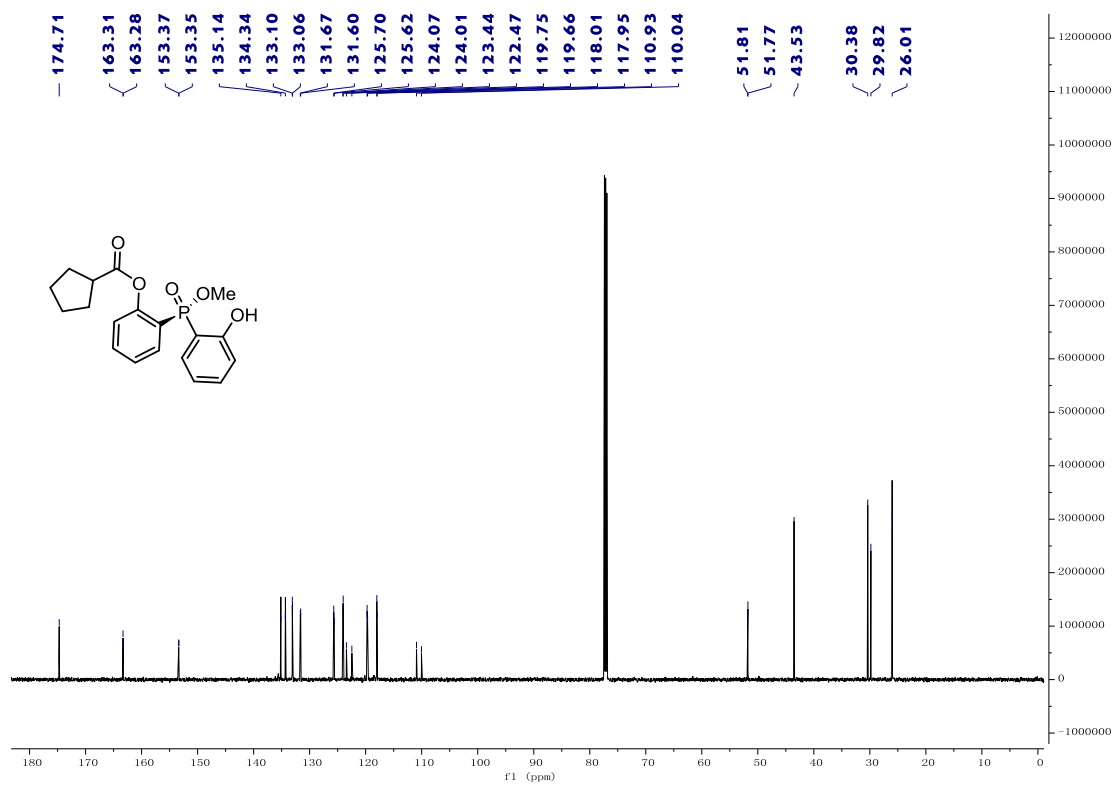

### <sup>31</sup>P-NMR(162 MHZ, CDCl<sub>3</sub>) Spectrum of 3ah

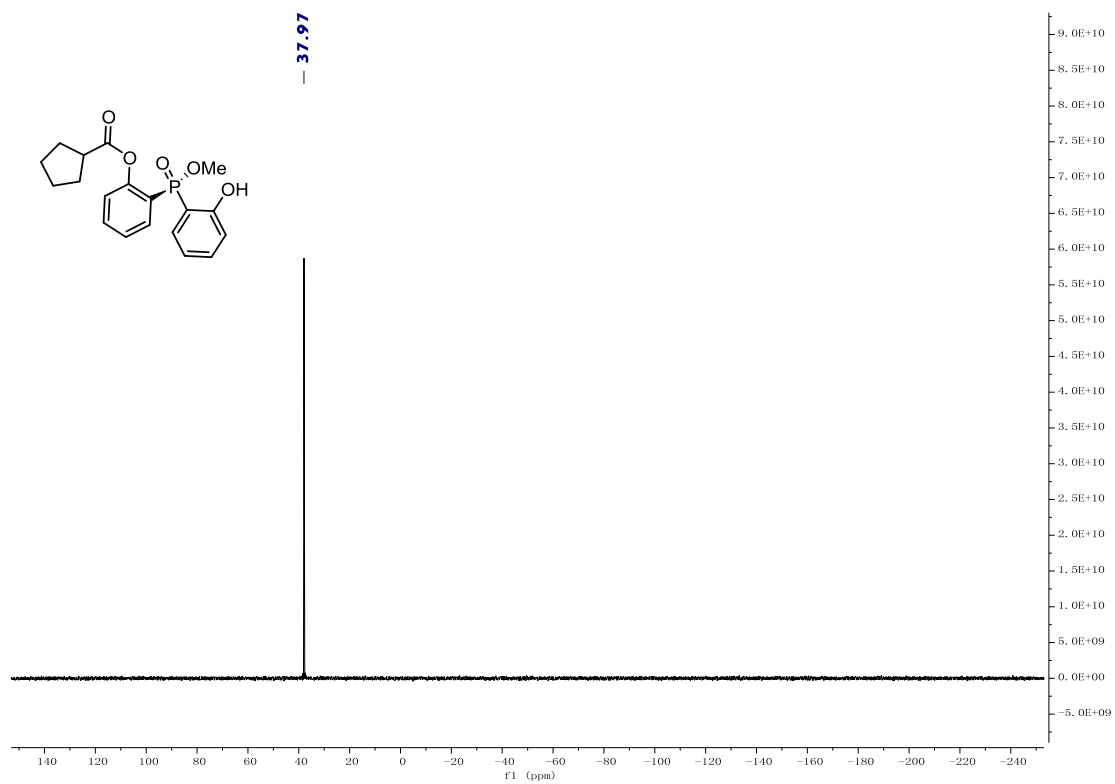

### <sup>1</sup>H-NMR(600 MHZ, CDCl<sub>3</sub>) Spectrum of 3ai

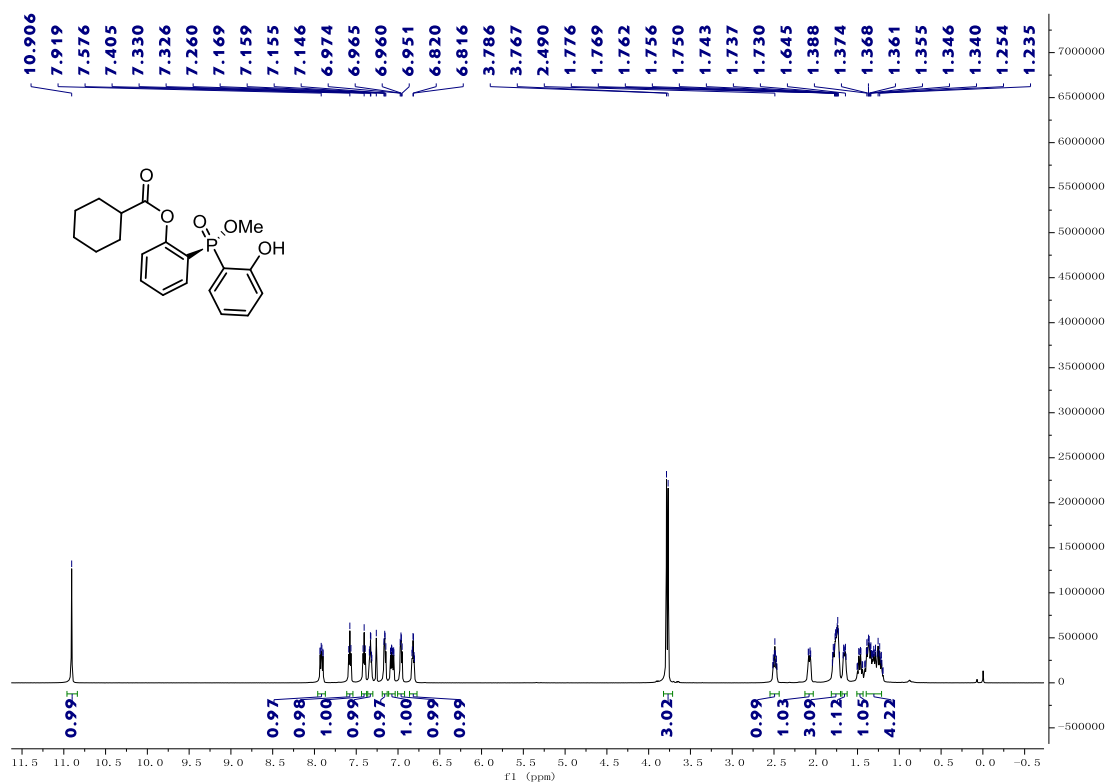

### <sup>13</sup>C-NMR(150 MHZ, CDCl<sub>3</sub>) Spectrum of 3ai

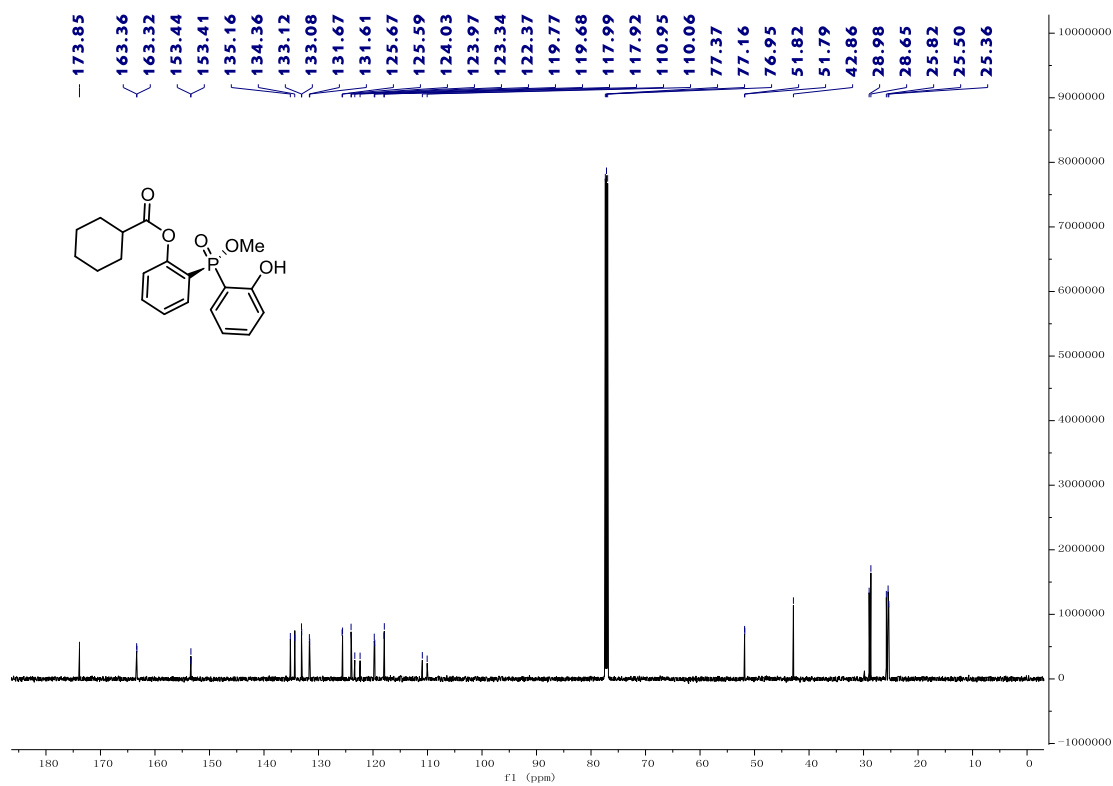

### <sup>31</sup>P-NMR(162 MHZ, CDCl<sub>3</sub>) Spectrum of 3ai

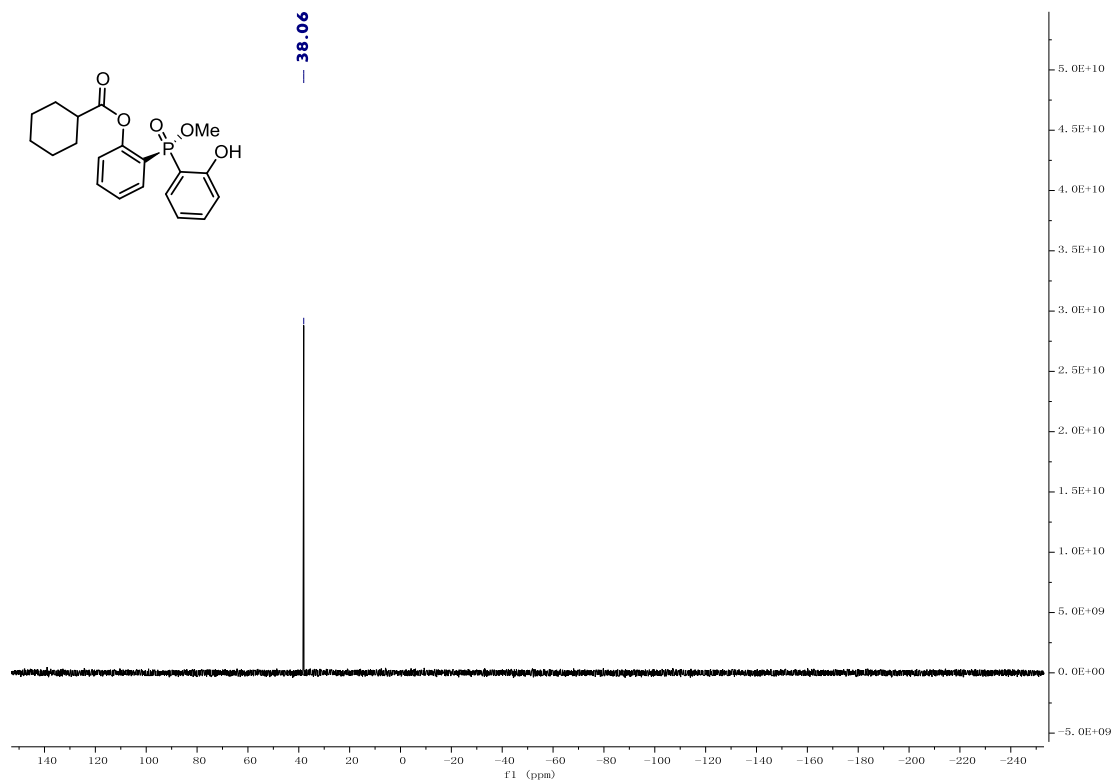

### <sup>1</sup>H-NMR(400 MHZ, CDCl<sub>3</sub>) Spectrum of 3aj

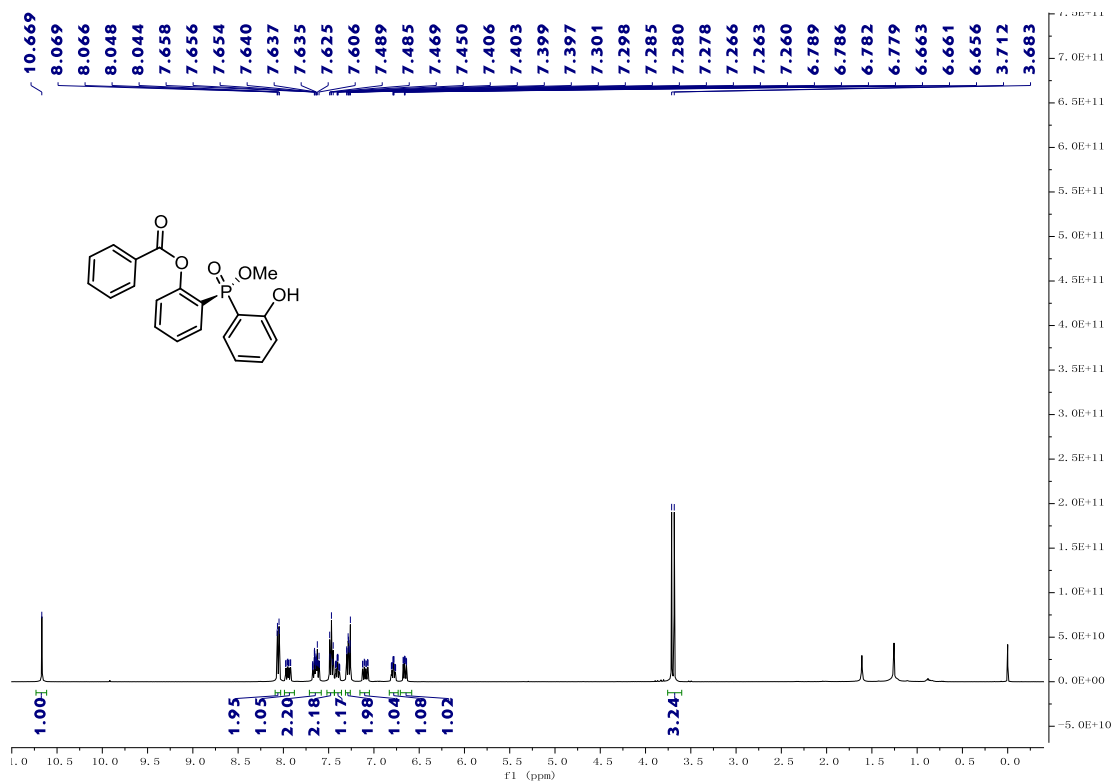



**<sup>13</sup>C-NMR(150 MHZ, CDCl<sub>3</sub>) Spectrum of 3aj**

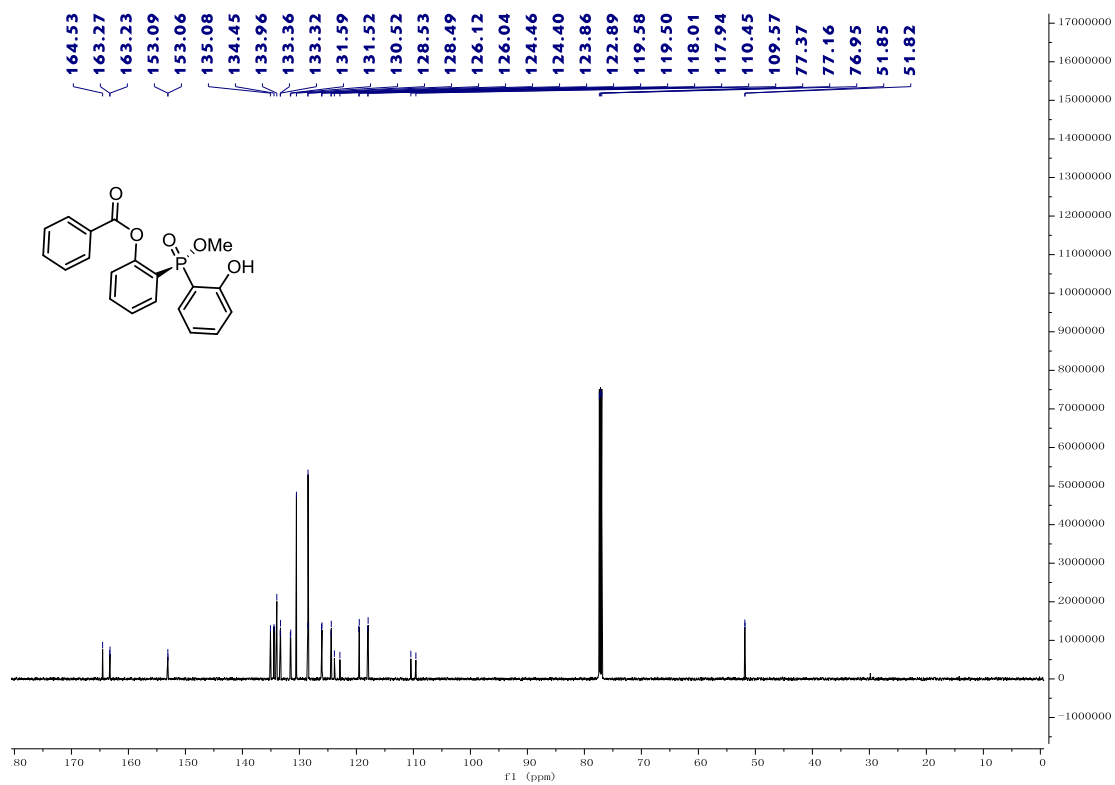

**<sup>31</sup>P-NMR(162 MHZ, CDCl<sub>3</sub>) Spectrum of 3aj**

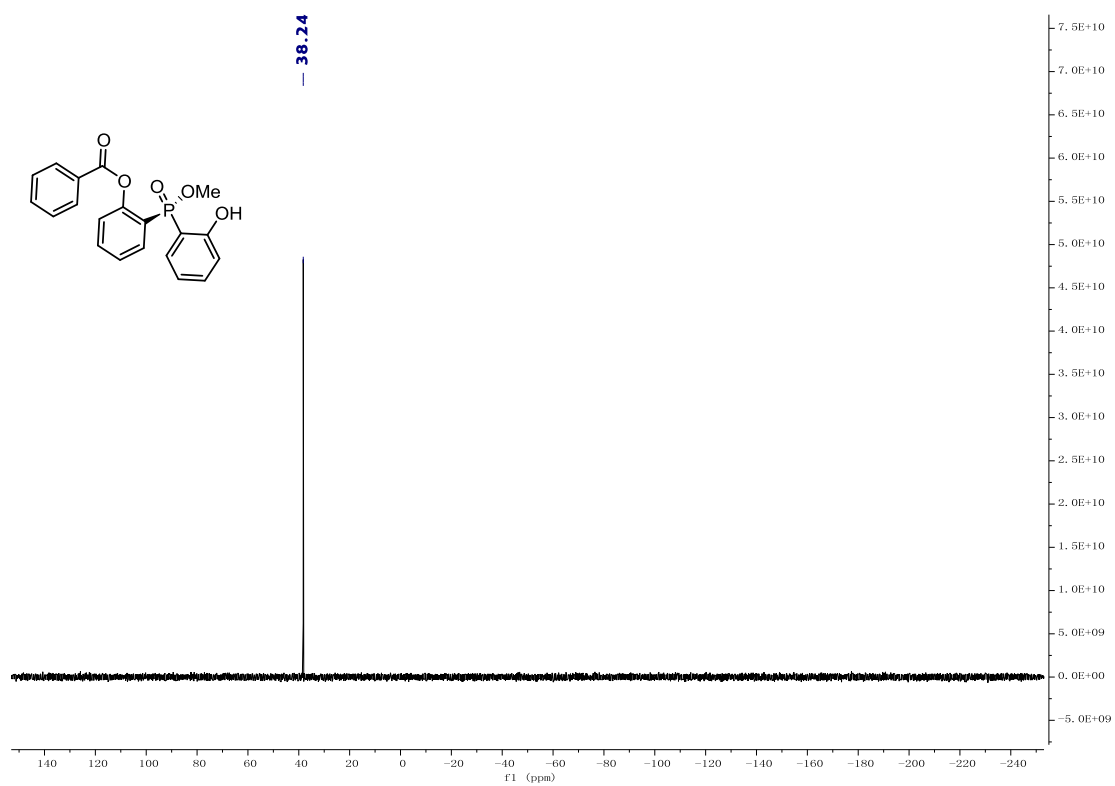

### <sup>1</sup>H-NMR(600 MHZ, CDCl<sub>3</sub>) Spectrum of 3ak

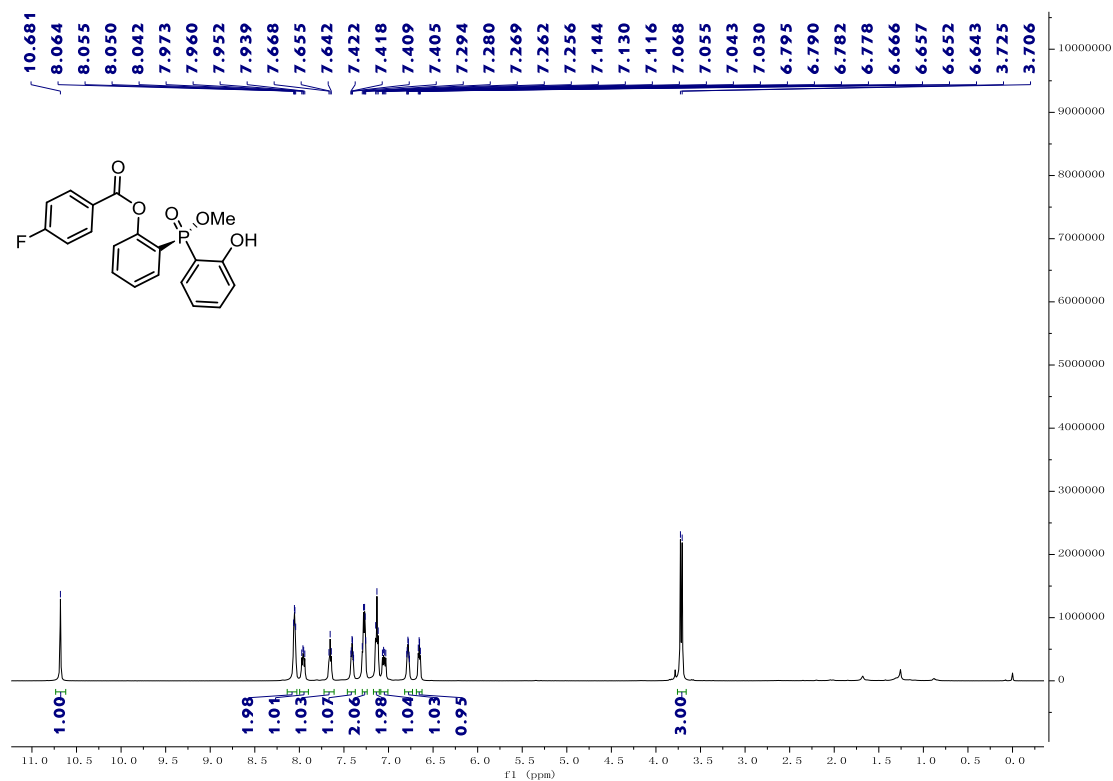

### <sup>13</sup>C-NMR(150 MHZ, CDCl<sub>3</sub>) Spectrum of 3ak

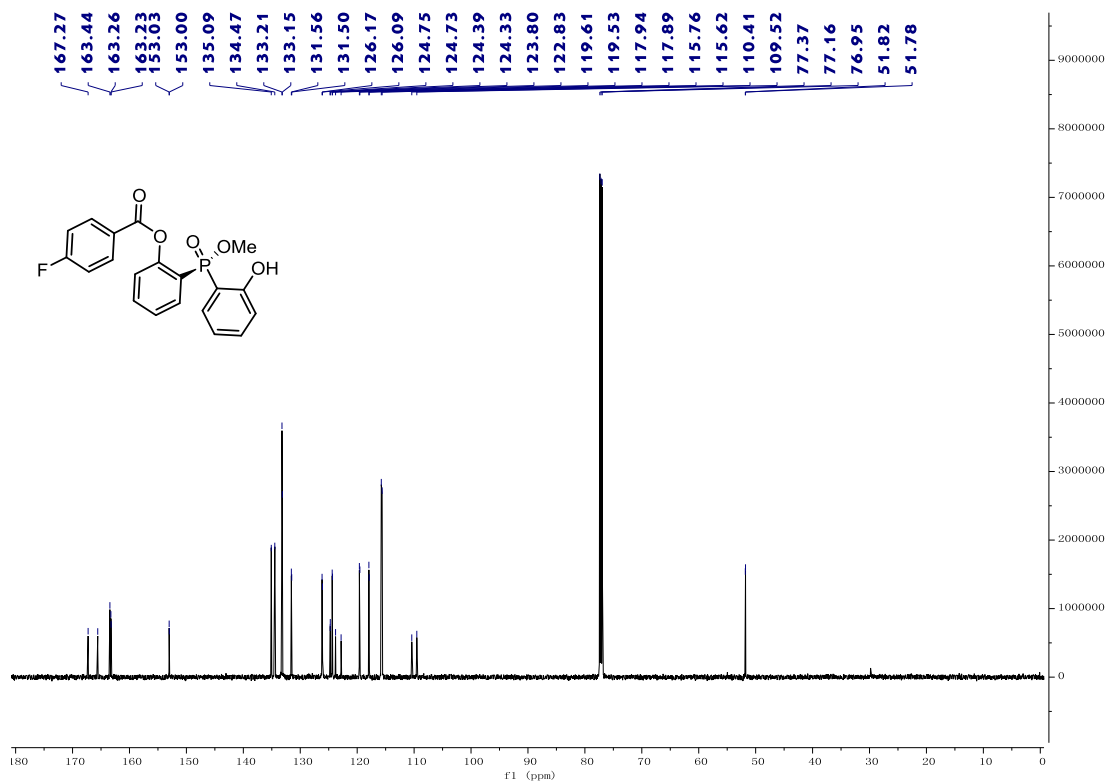

**<sup>31</sup>P-NMR(242 MHZ, CDCl<sub>3</sub>) Spectrum of 3ak**

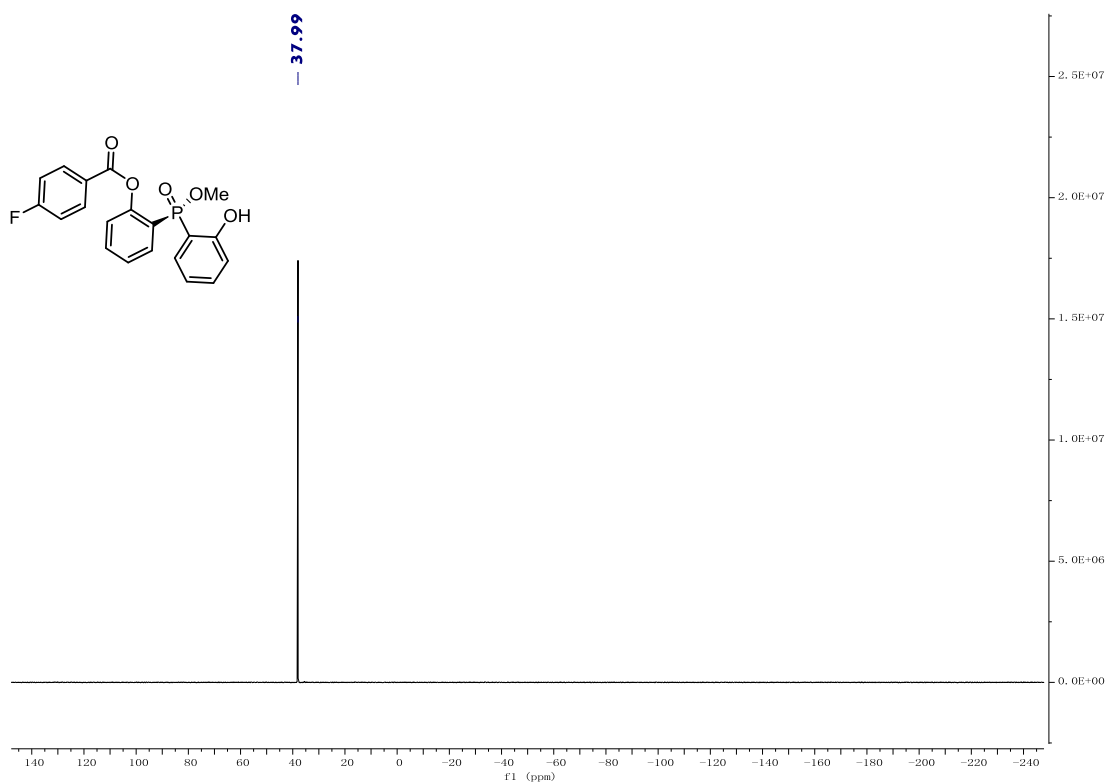

**<sup>19</sup>F-NMR(376 MHZ, CDCl<sub>3</sub>) Spectrum of 3ak**

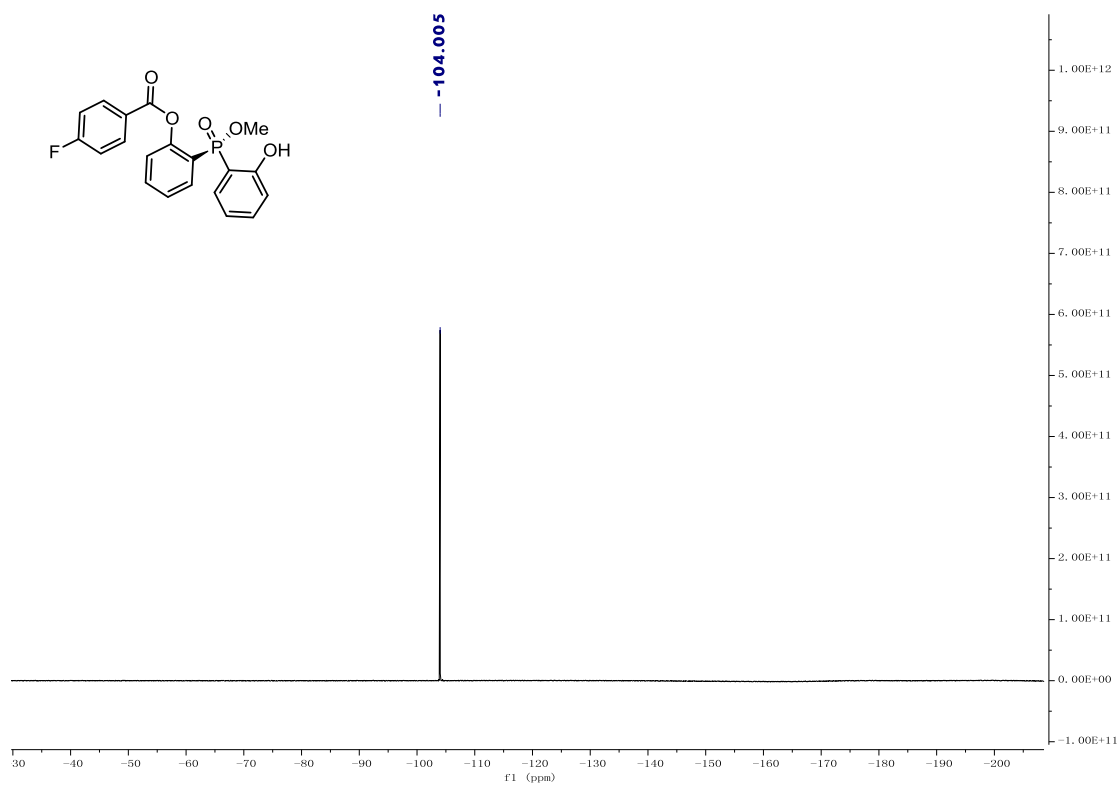

### <sup>1</sup>H-NMR(600 MHZ, CDCl<sub>3</sub>) Spectrum of 3al

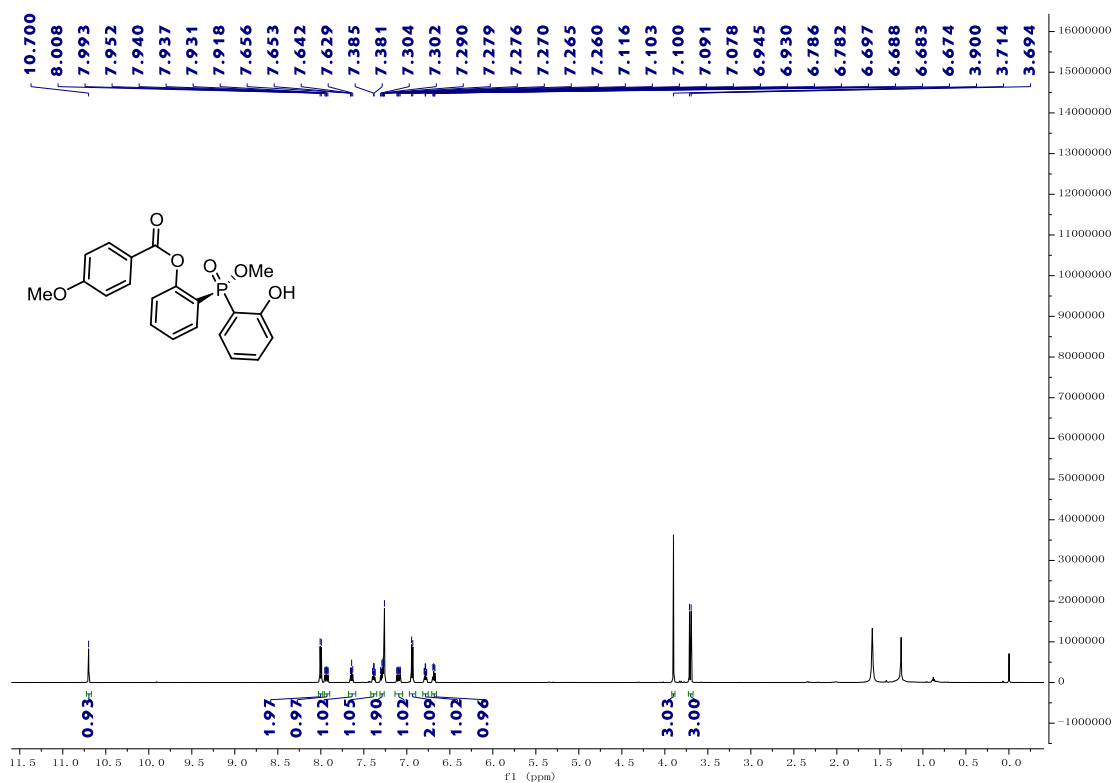

### <sup>13</sup>C-NMR(150 MHZ, CDCl<sub>3</sub>) Spectrum of 3al

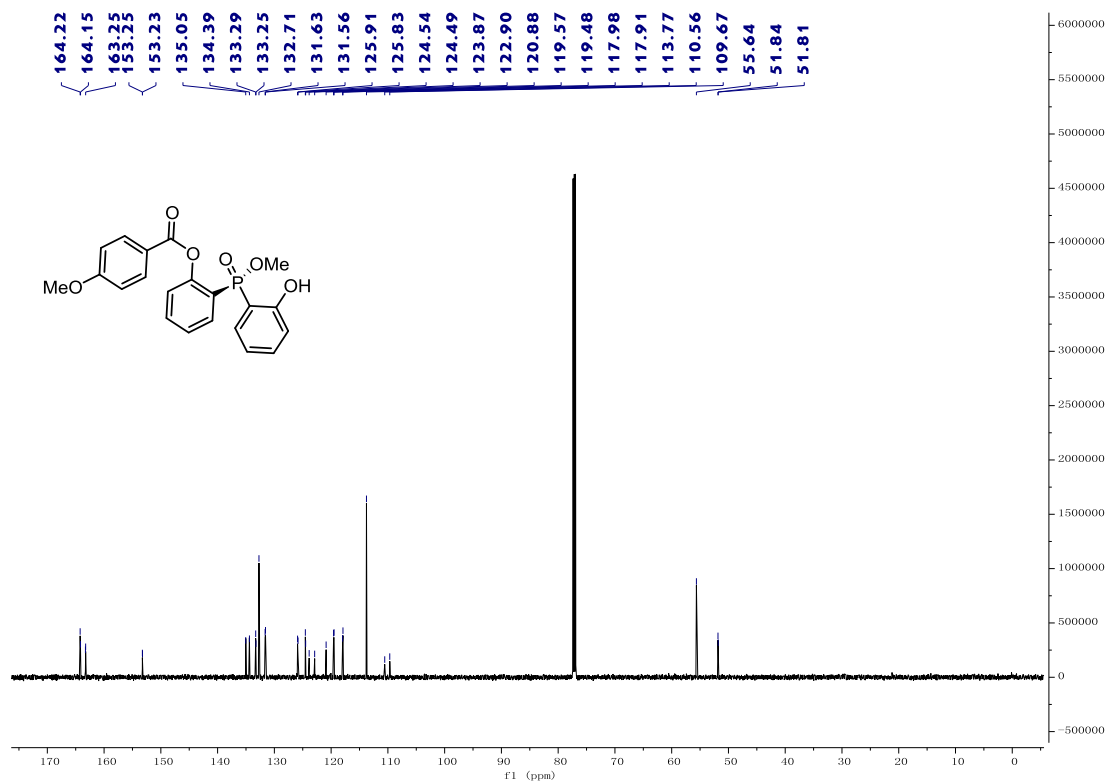

### <sup>31</sup>P-NMR(243 MHZ, CDCl<sub>3</sub>) Spectrum of 3al

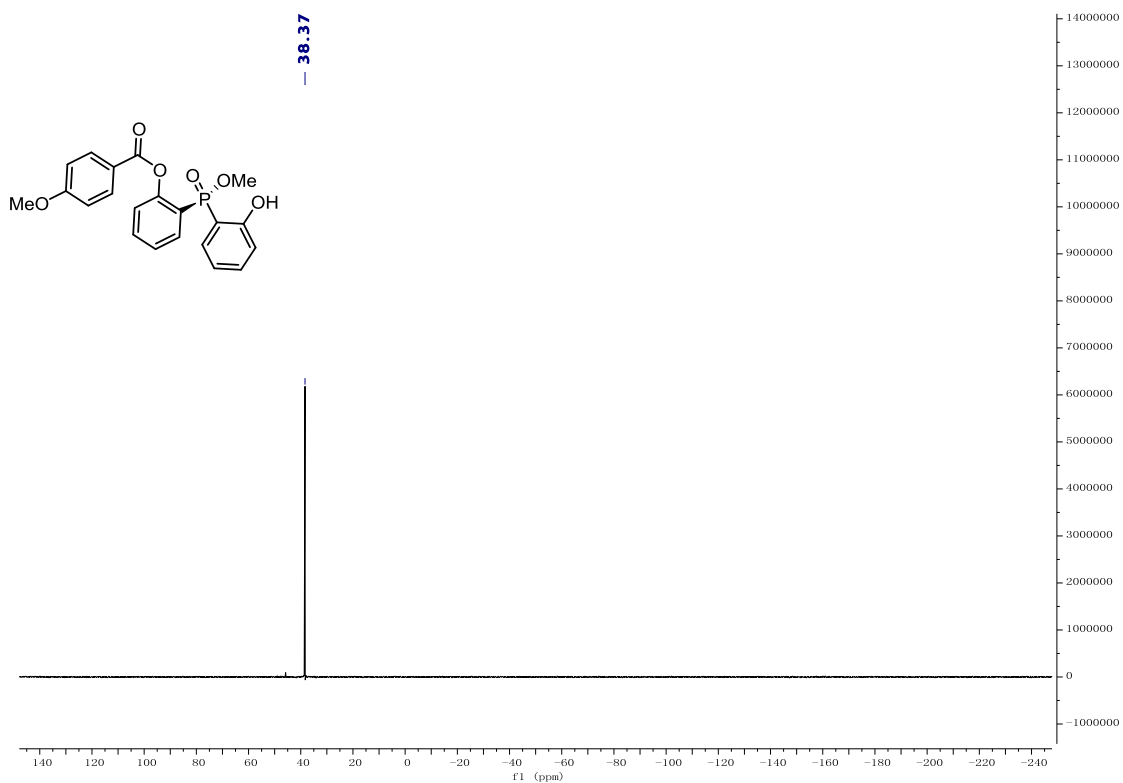

### <sup>1</sup>H-NMR(400 MHZ, CDCl<sub>3</sub>) Spectrum of 3am

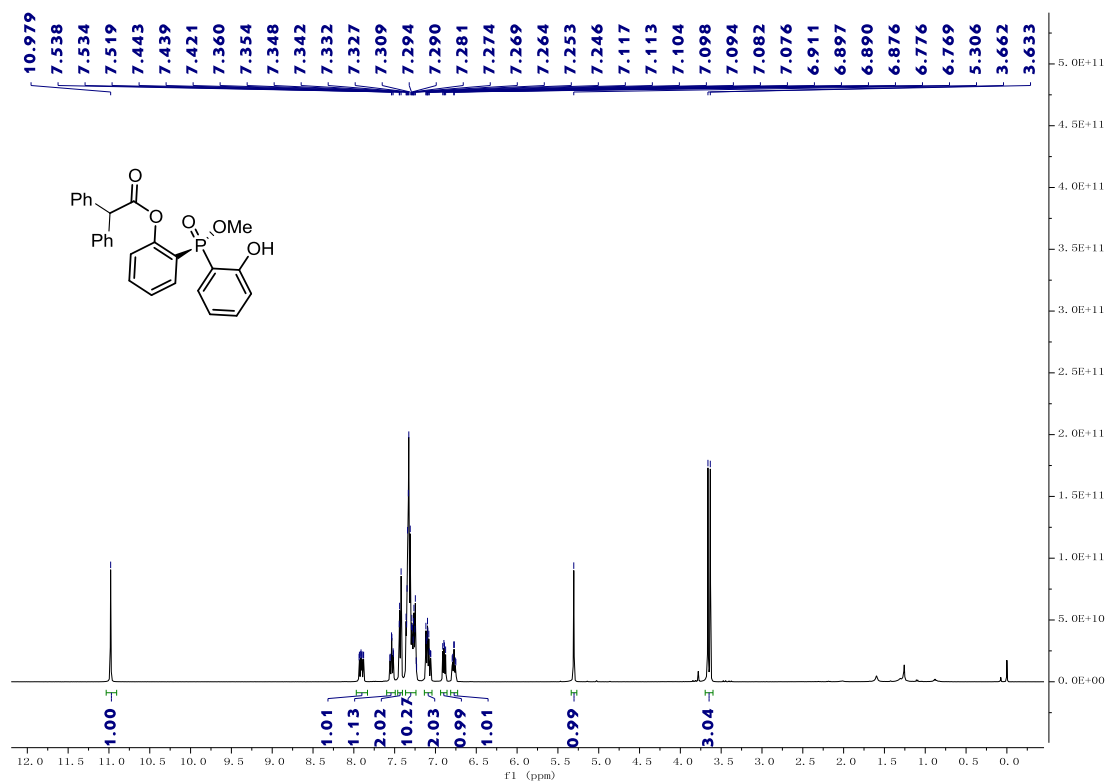

### <sup>13</sup>C-NMR(150 MHz, CDCl<sub>3</sub>) Spectrum of 3am

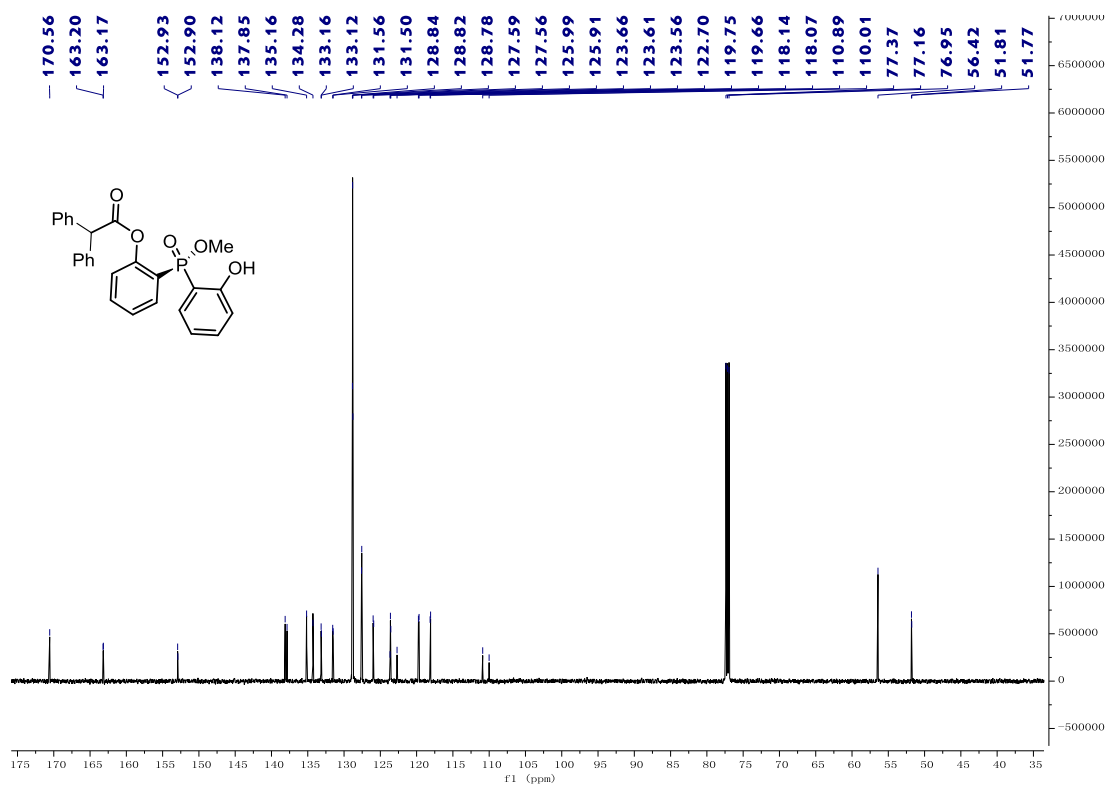

### <sup>31</sup>P-NMR(243 MHz, CDCl<sub>3</sub>) Spectrum of 3am

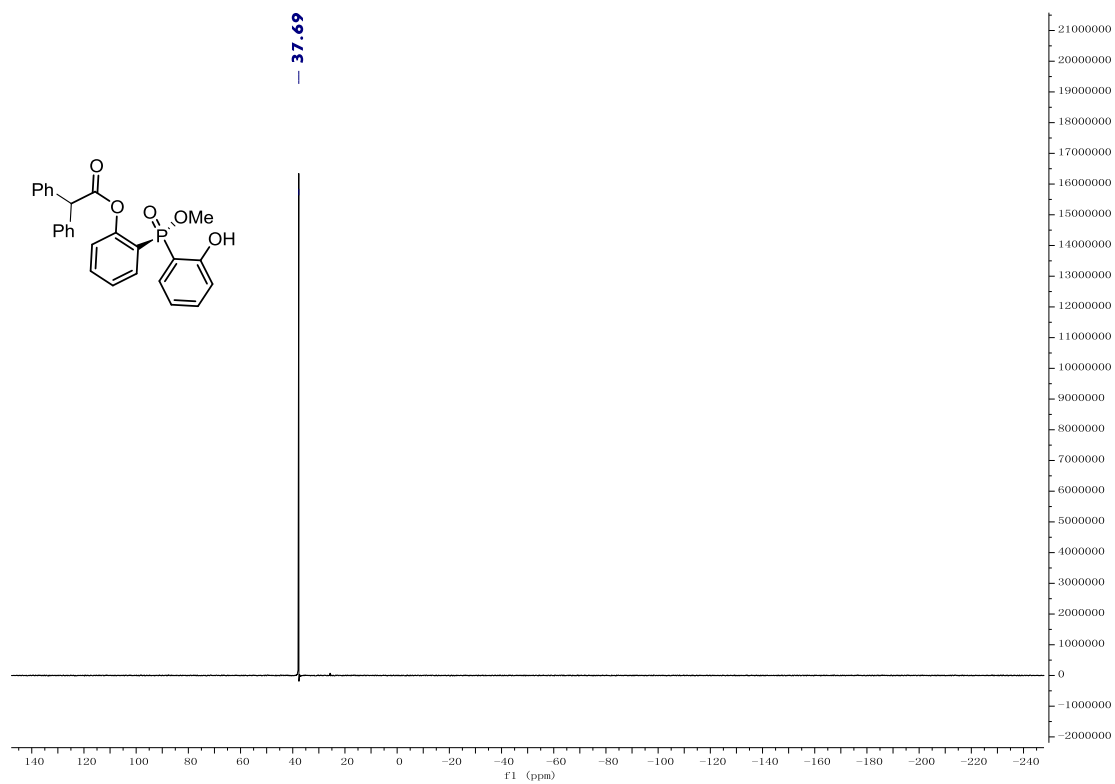

### <sup>1</sup>H-NMR(600 MHZ, CDCl<sub>3</sub>) Spectrum of 3an

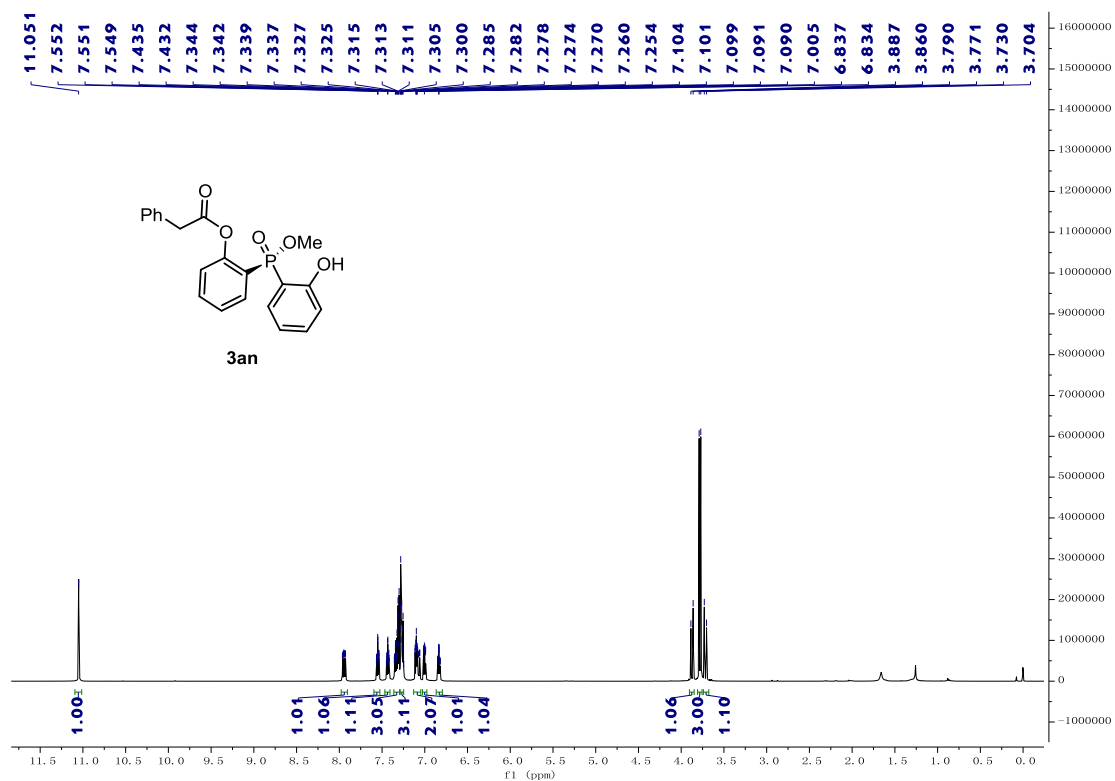

### <sup>13</sup>C-NMR(150 MHZ, CDCl<sub>3</sub>) Spectrum of 3an

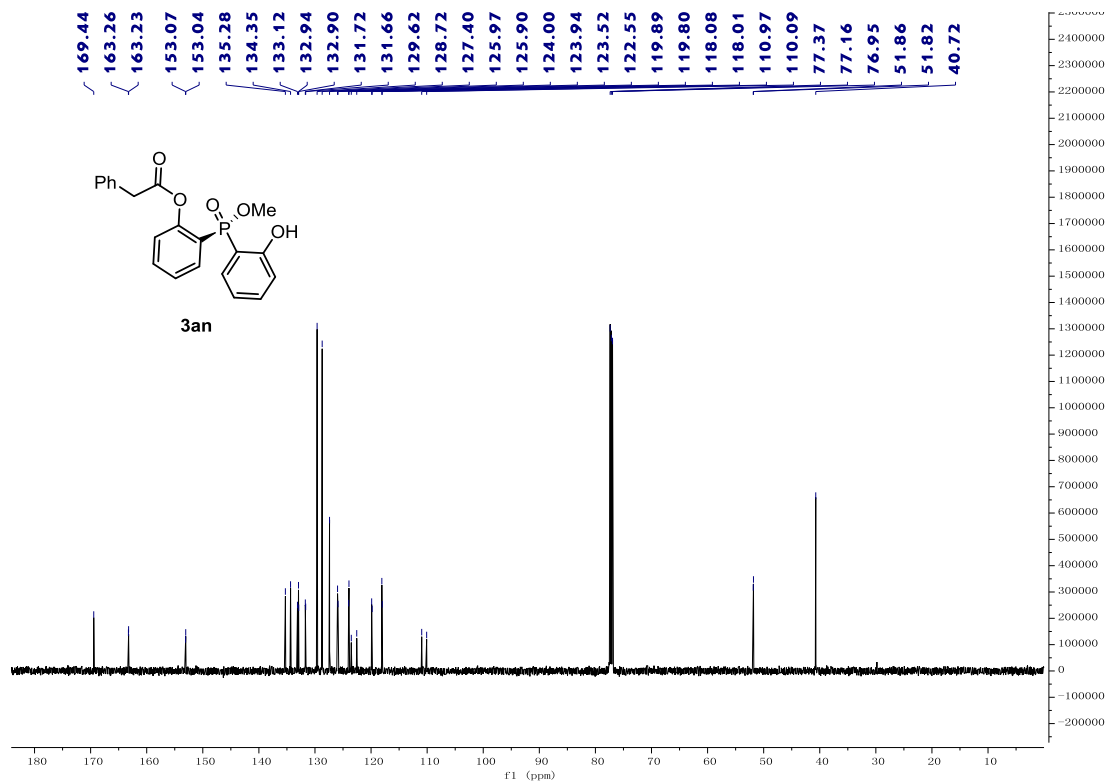

### <sup>31</sup>P-NMR(243 MHZ, CDCl<sub>3</sub>) Spectrum of 3an

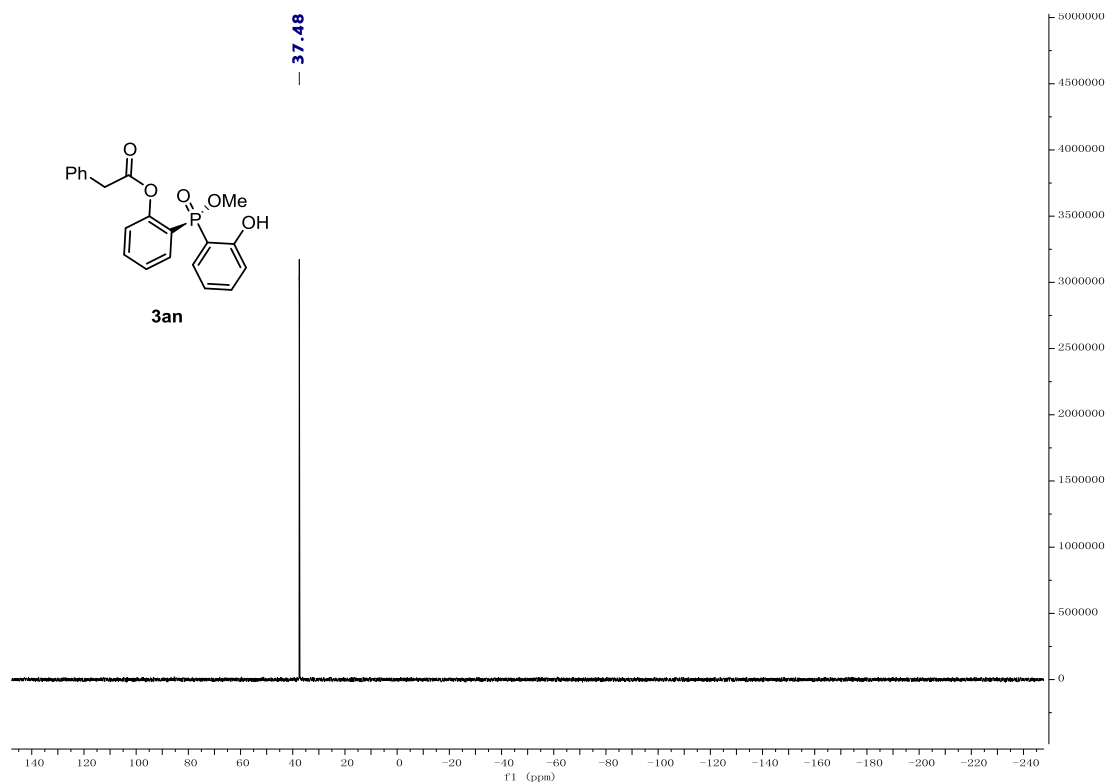

### <sup>1</sup>H-NMR(400 MHZ, CDCl<sub>3</sub>) Spectrum of 3ba

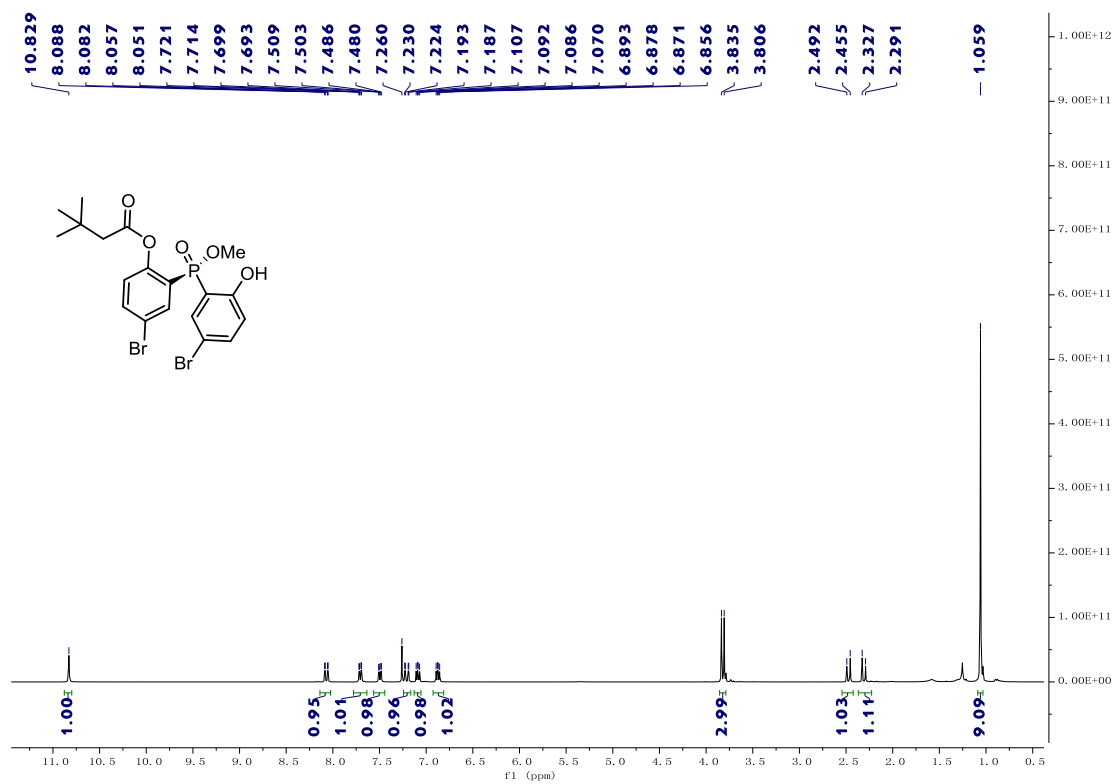



### <sup>13</sup>C-NMR(100 MHz, CDCl<sub>3</sub>) Spectrum of 3ba

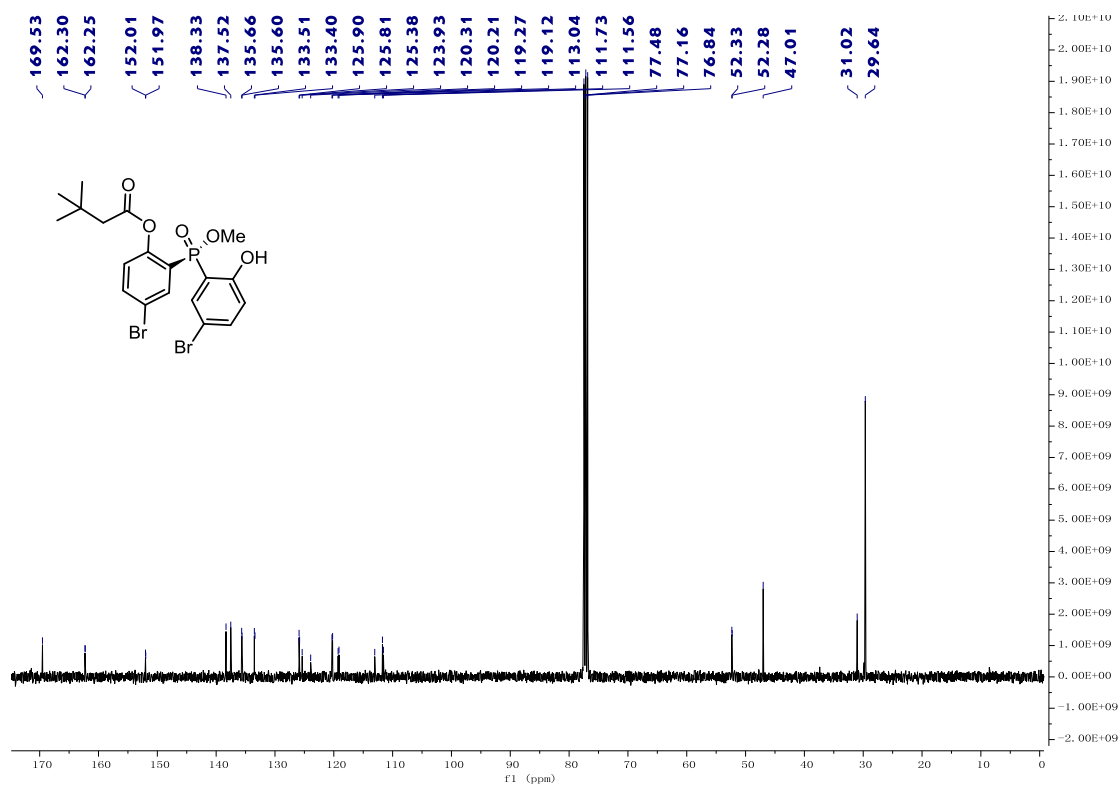

### <sup>31</sup>P-NMR(243 MHz, CDCl<sub>3</sub>) Spectrum of 3ba

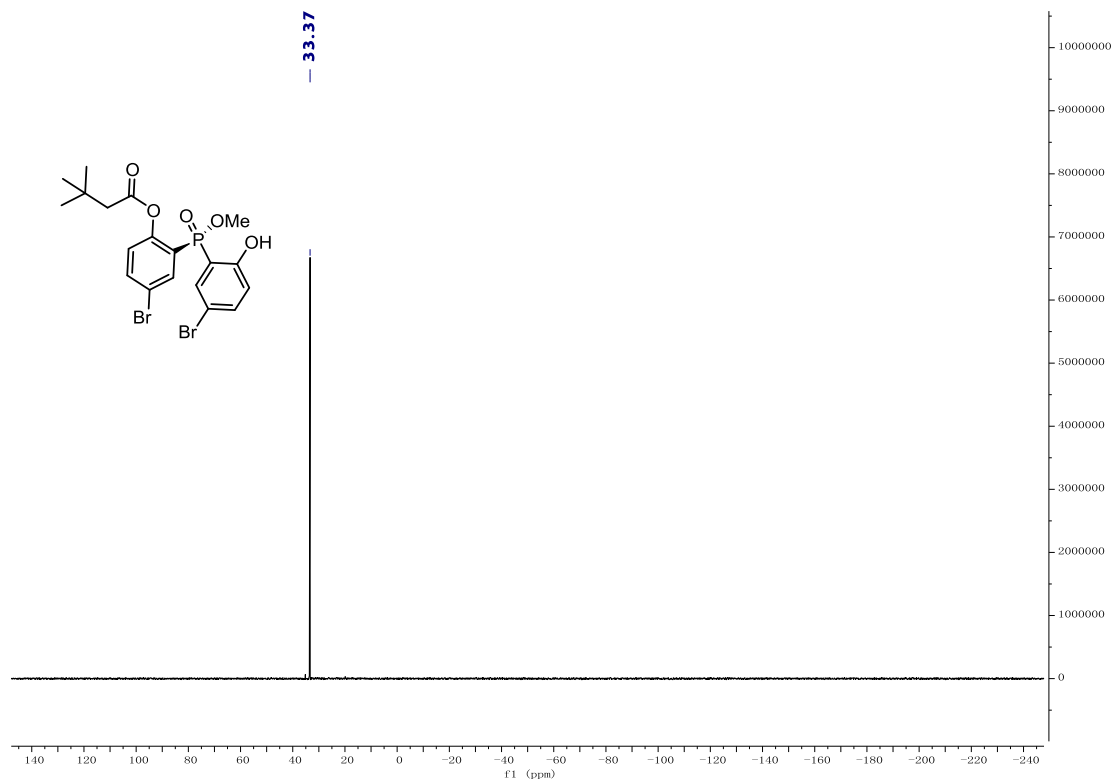

<sup>1</sup>H-NMR(400 MHZ, CDCl<sub>3</sub>) Spectrum of 3ca

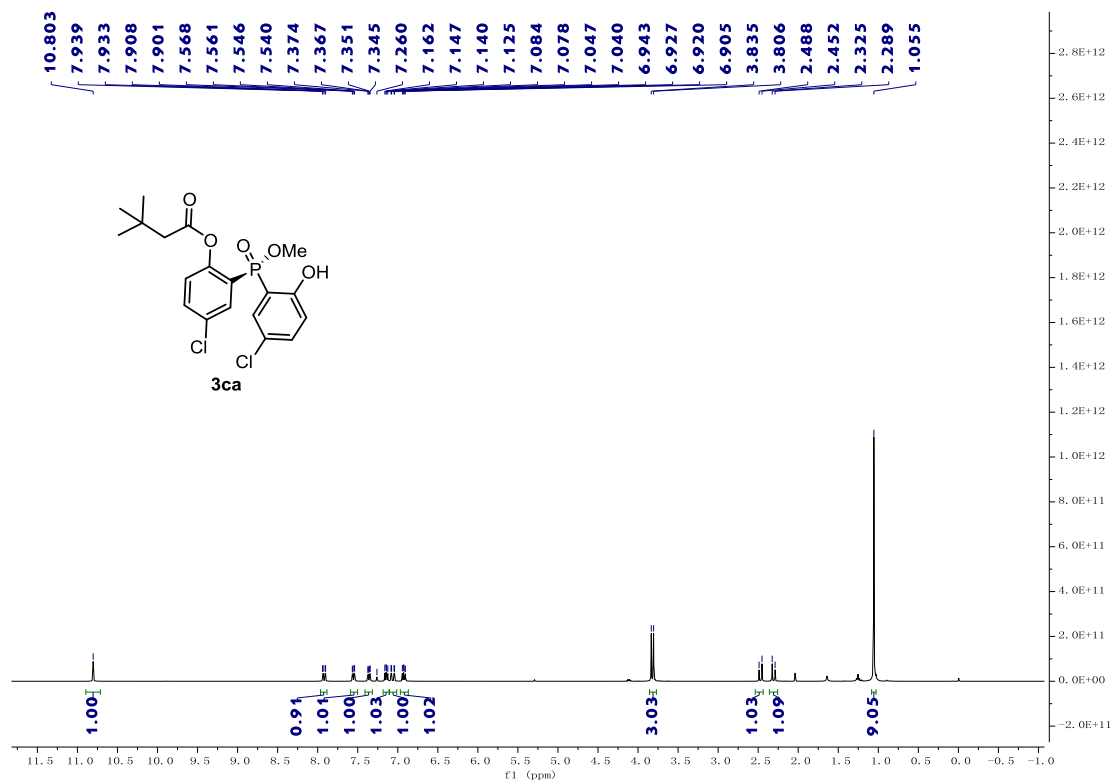

<sup>13</sup>C-NMR(100 MHZ, CDCl<sub>3</sub>) Spectrum of 3ca

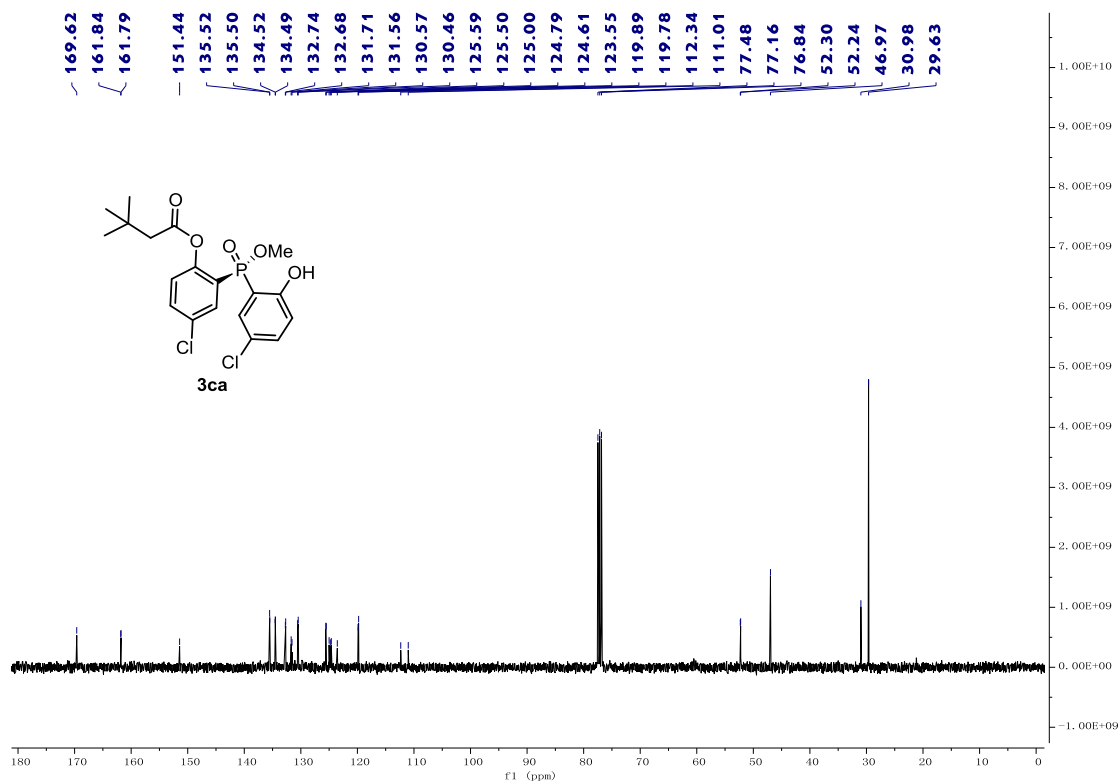

<sup>31</sup>P-NMR(162 MHZ, CDCl<sub>3</sub>) Spectrum of 3ca

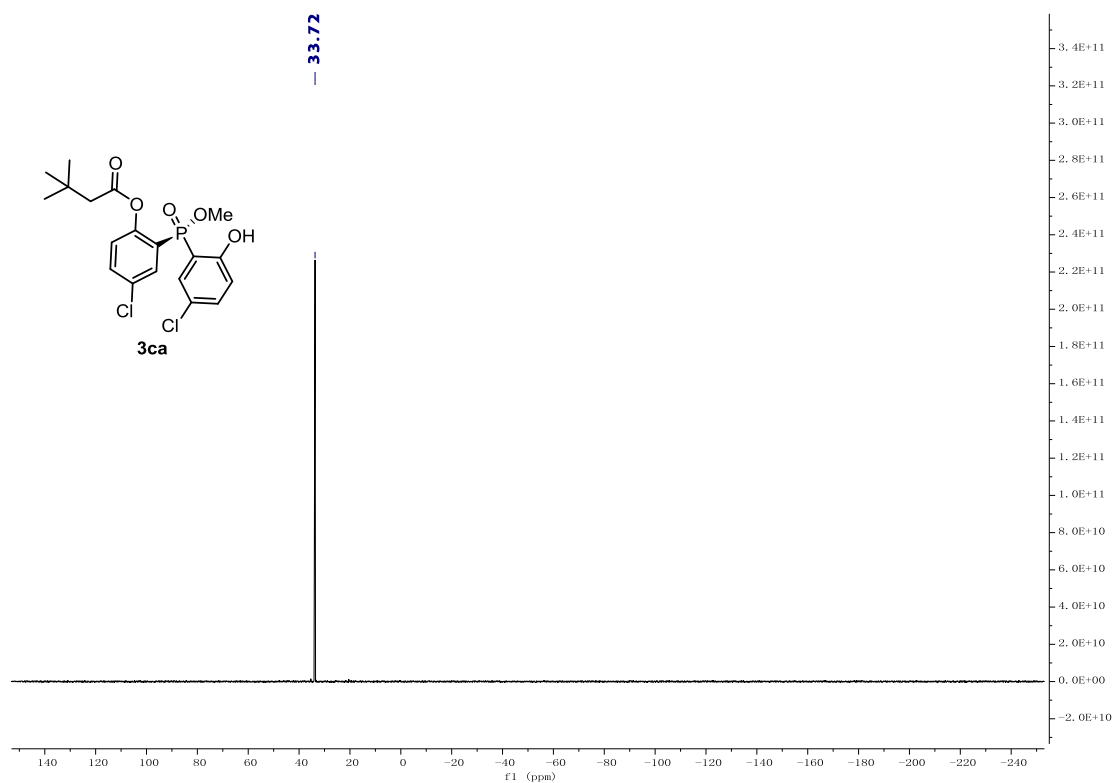

<sup>1</sup>H-NMR(600 MHZ, CDCl<sub>3</sub>) Spectrum of 3da

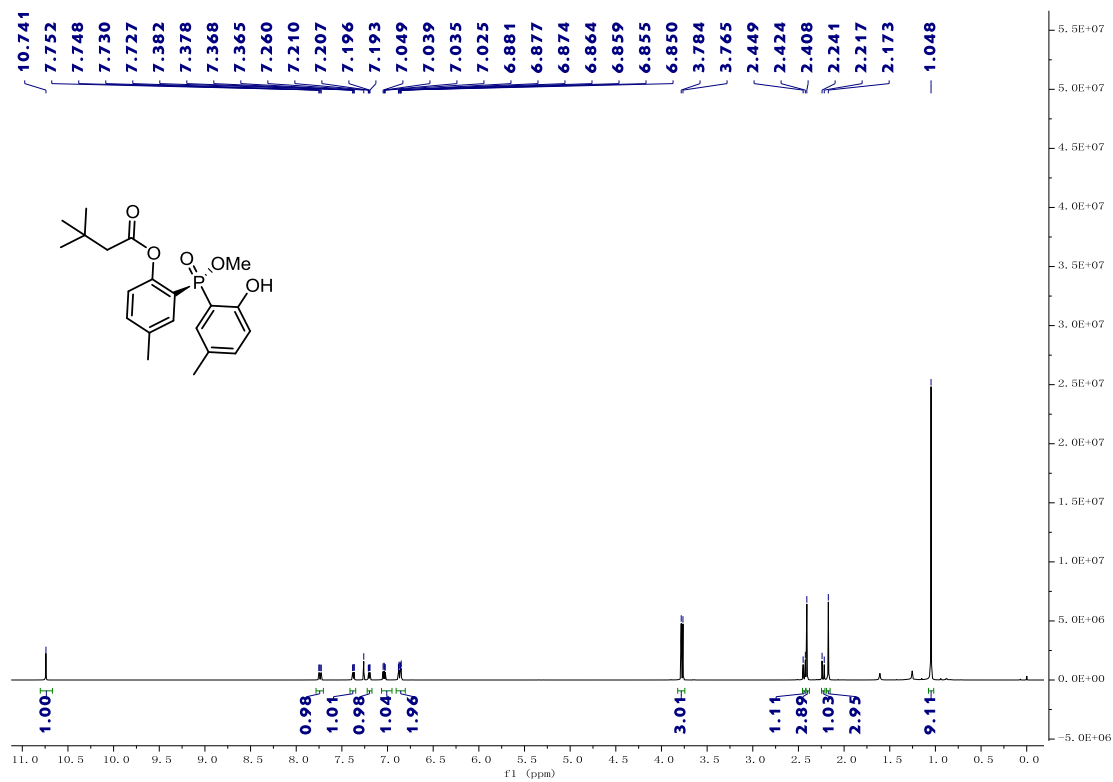

<sup>13</sup>C-NMR(150 MHZ, CDCl<sub>3</sub>) Spectrum of 3da

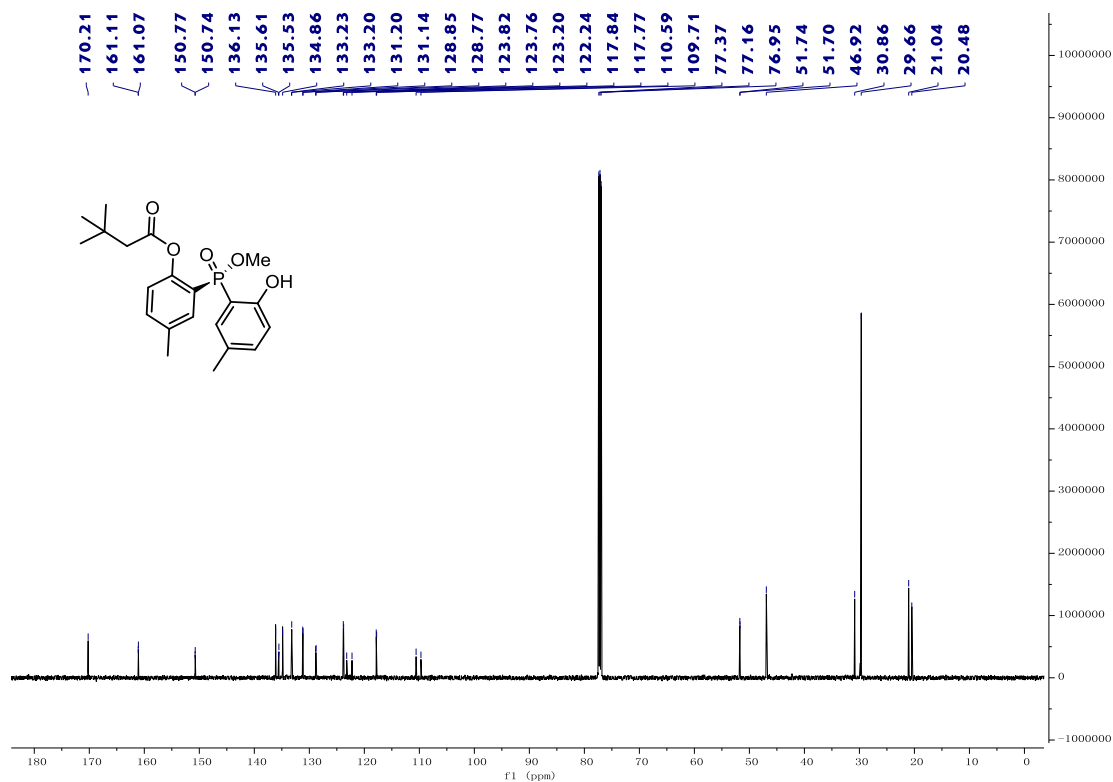

<sup>31</sup>P-NMR(243 MHZ, CDCl<sub>3</sub>) Spectrum of 3da

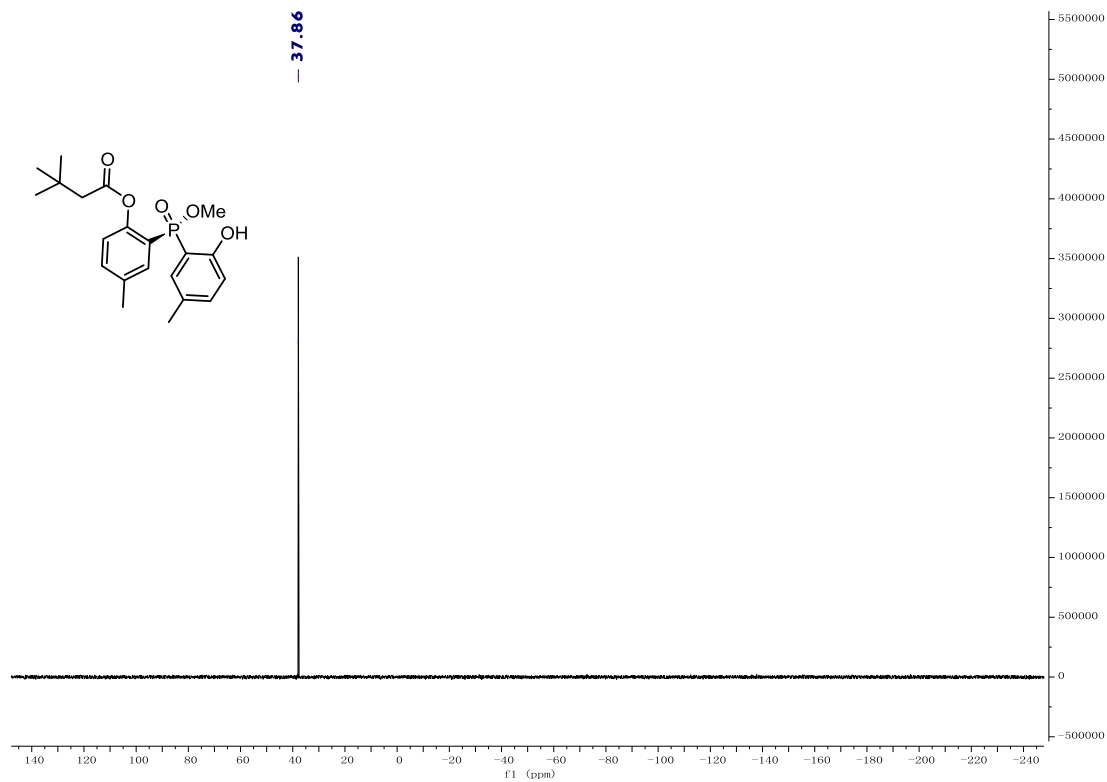

### <sup>1</sup>H-NMR(400 MHZ, CDCl<sub>3</sub>) Spectrum of 3ea

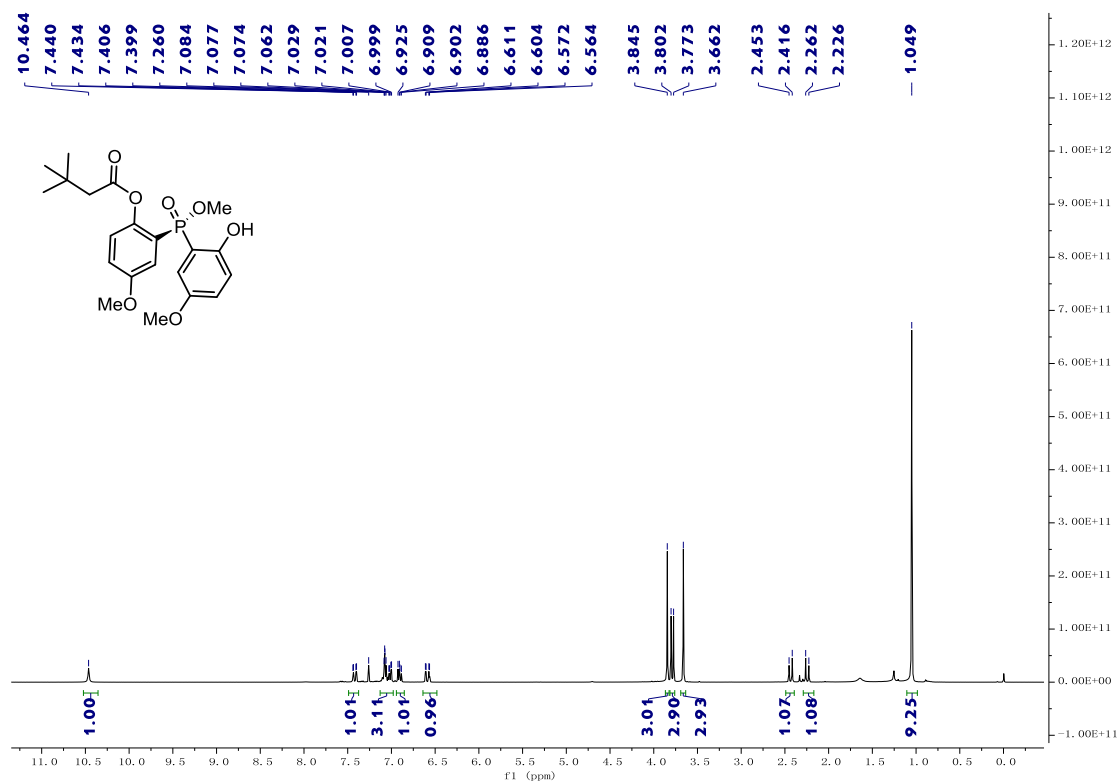

### <sup>13</sup>C-NMR(100 MHZ, CDCl<sub>3</sub>) Spectrum of 3ea

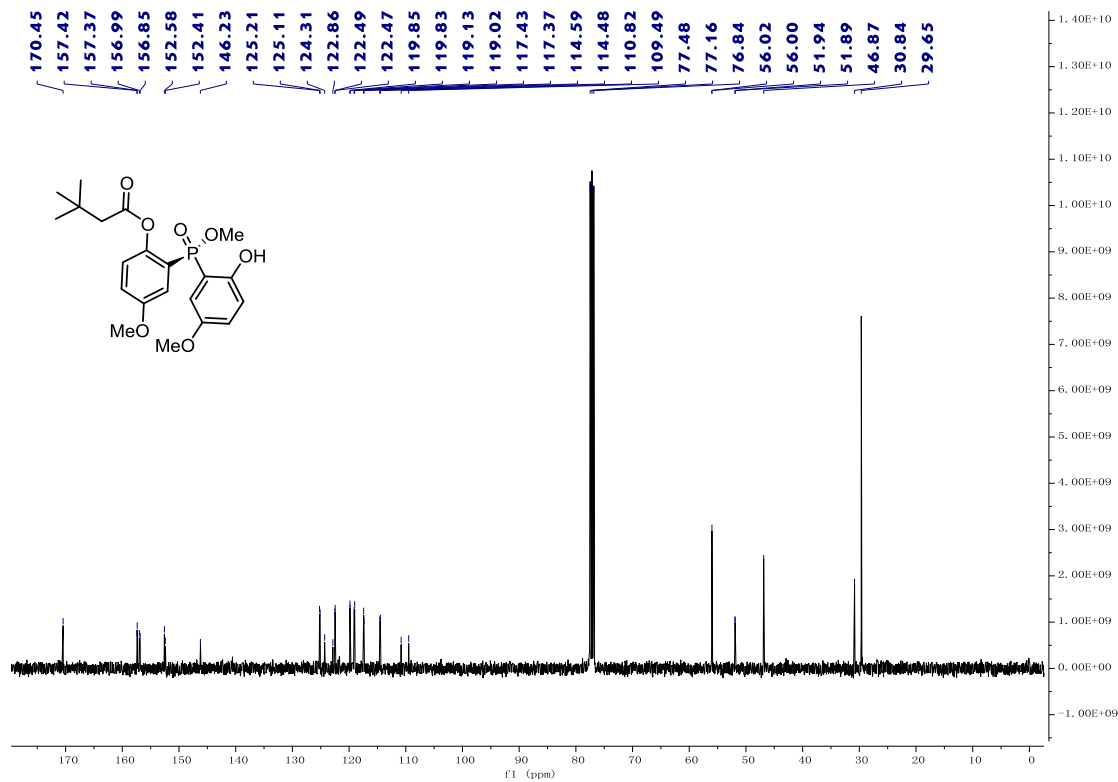

<sup>31</sup>P-NMR(243 MHZ, CDCl<sub>3</sub>) Spectrum of 3ea

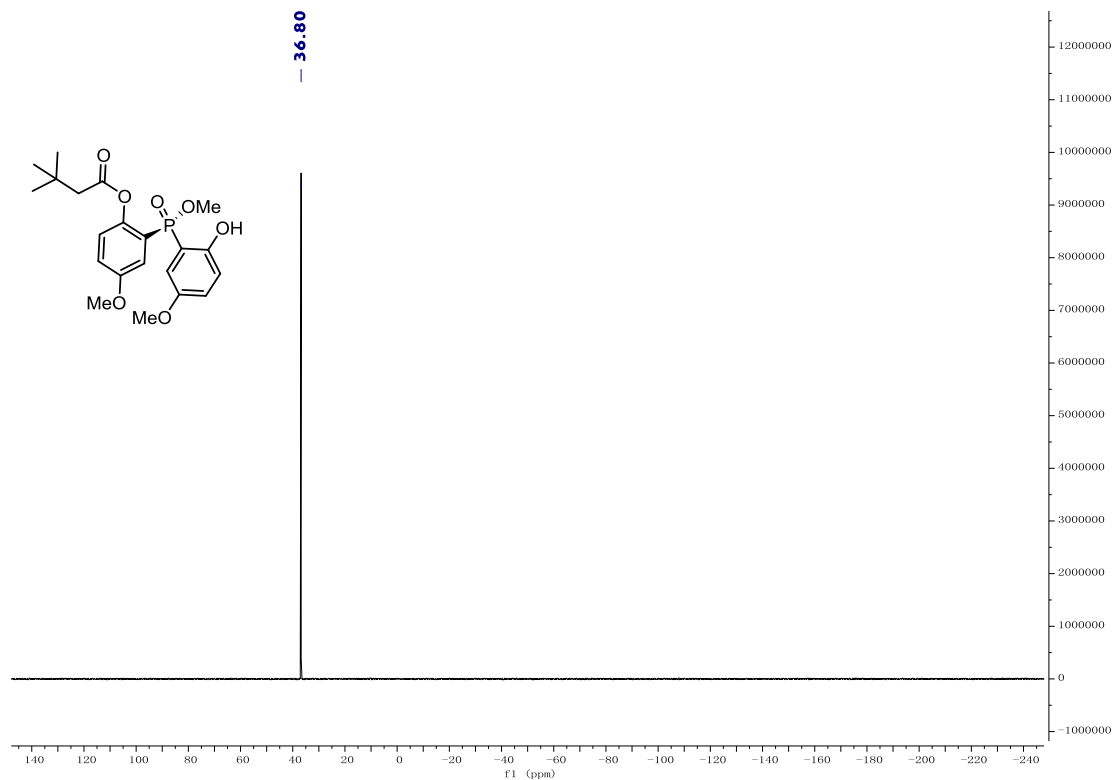

<sup>1</sup>H-NMR(600 MHZ, CDCl<sub>3</sub>) Spectrum of 3fa

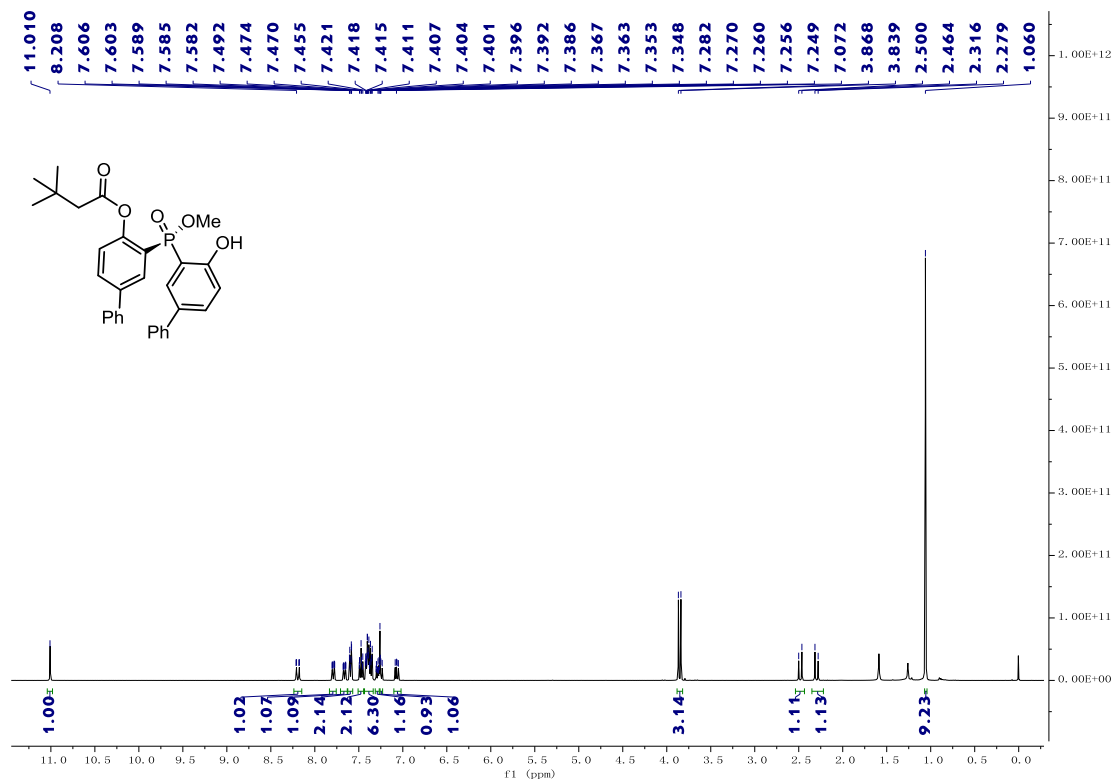

### <sup>13</sup>C-NMR(100 MHZ, CDCl<sub>3</sub>) Spectrum of 3fa

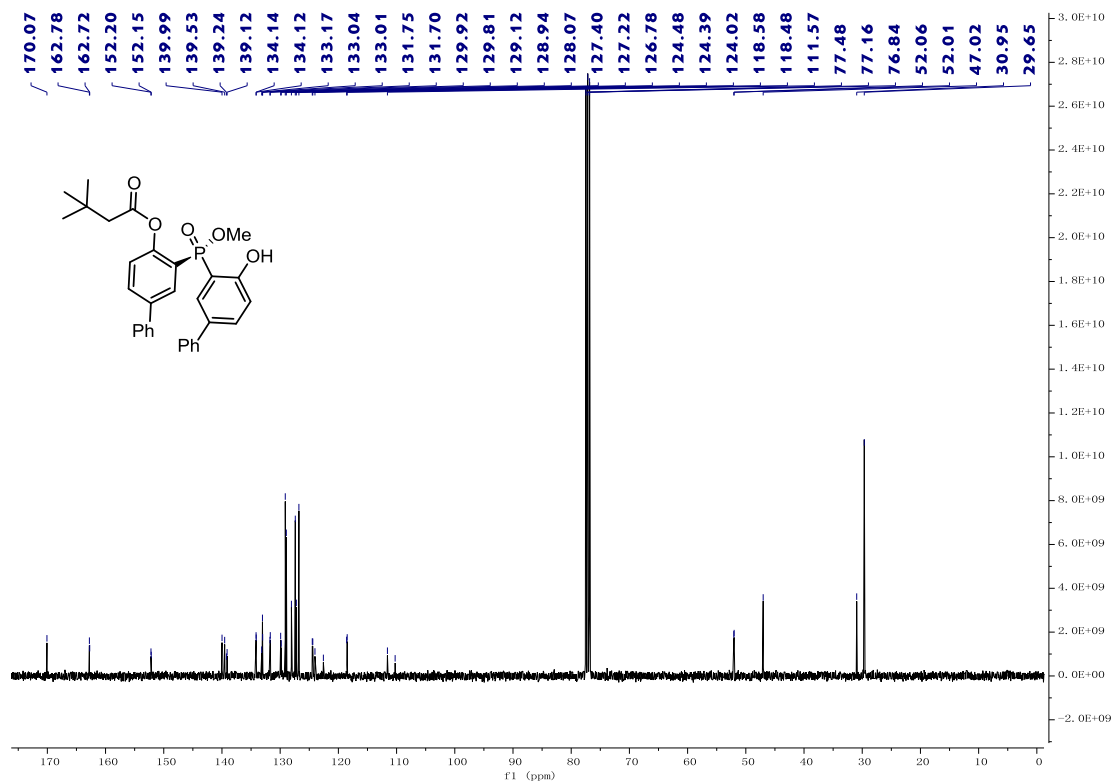

### <sup>31</sup>P-NMR(243 MHZ, CDCl<sub>3</sub>) Spectrum of 3fa

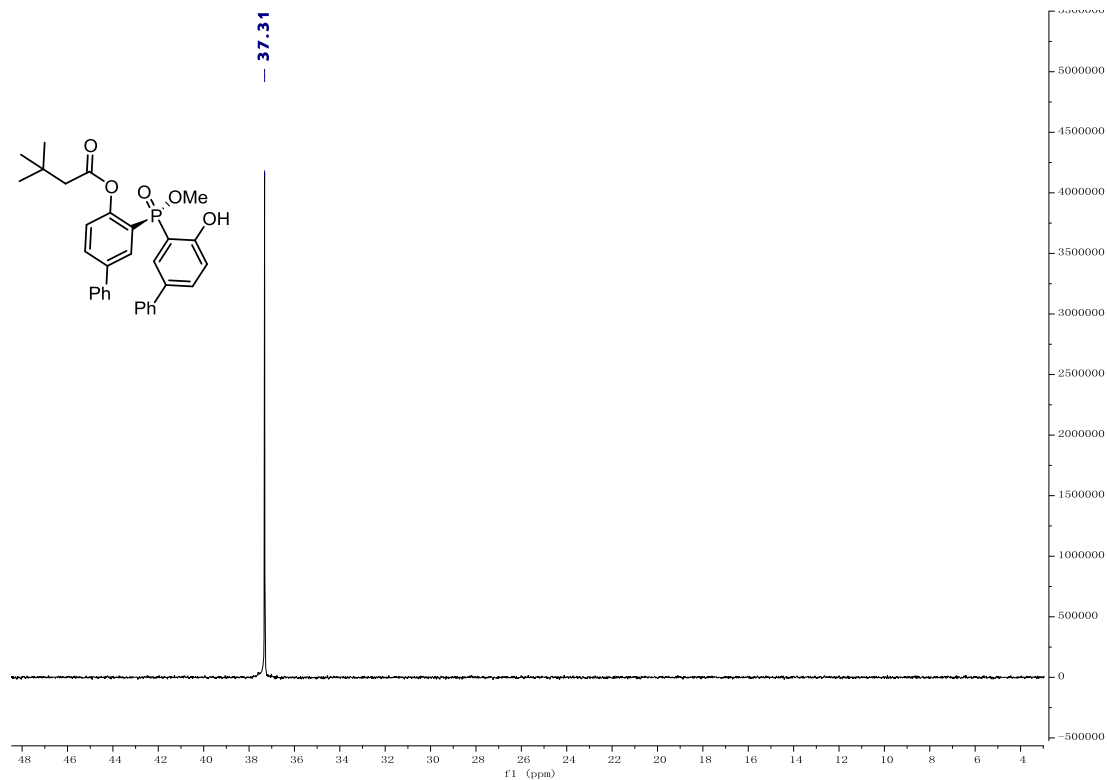

### <sup>1</sup>H-NMR(400 MHZ, CDCl<sub>3</sub>) Spectrum of 3ga

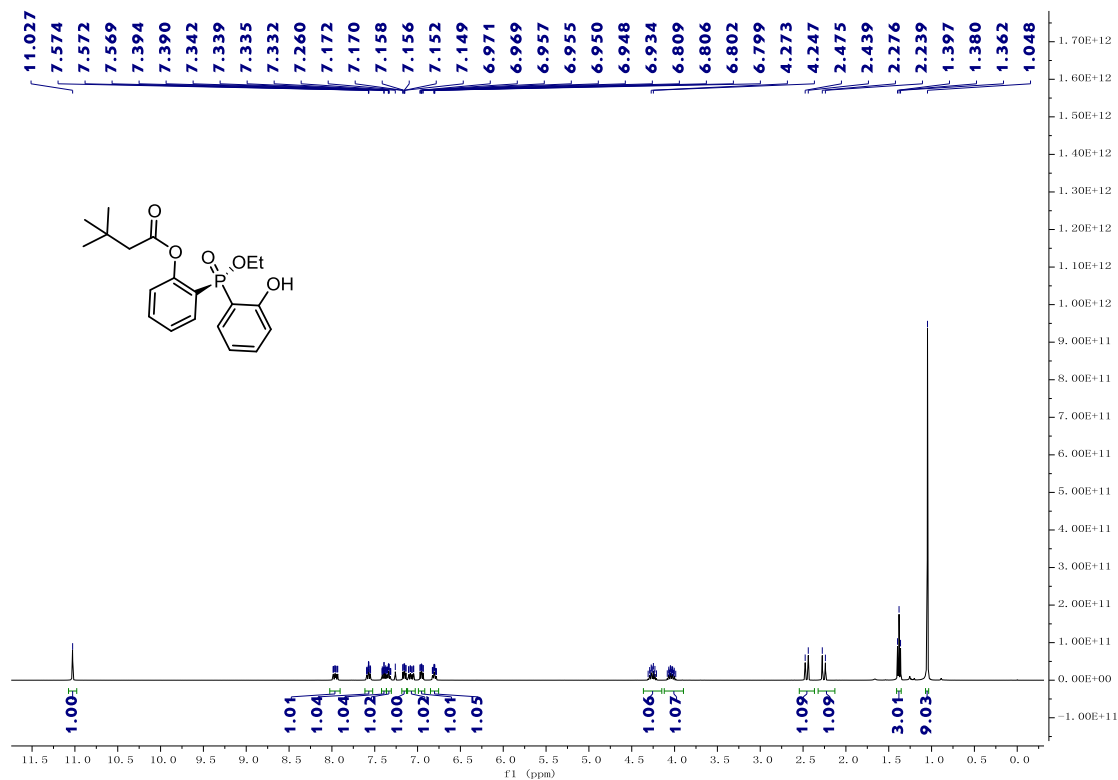

### <sup>13</sup>C-NMR(100 MHZ, CDCl<sub>3</sub>) Spectrum of 3ga

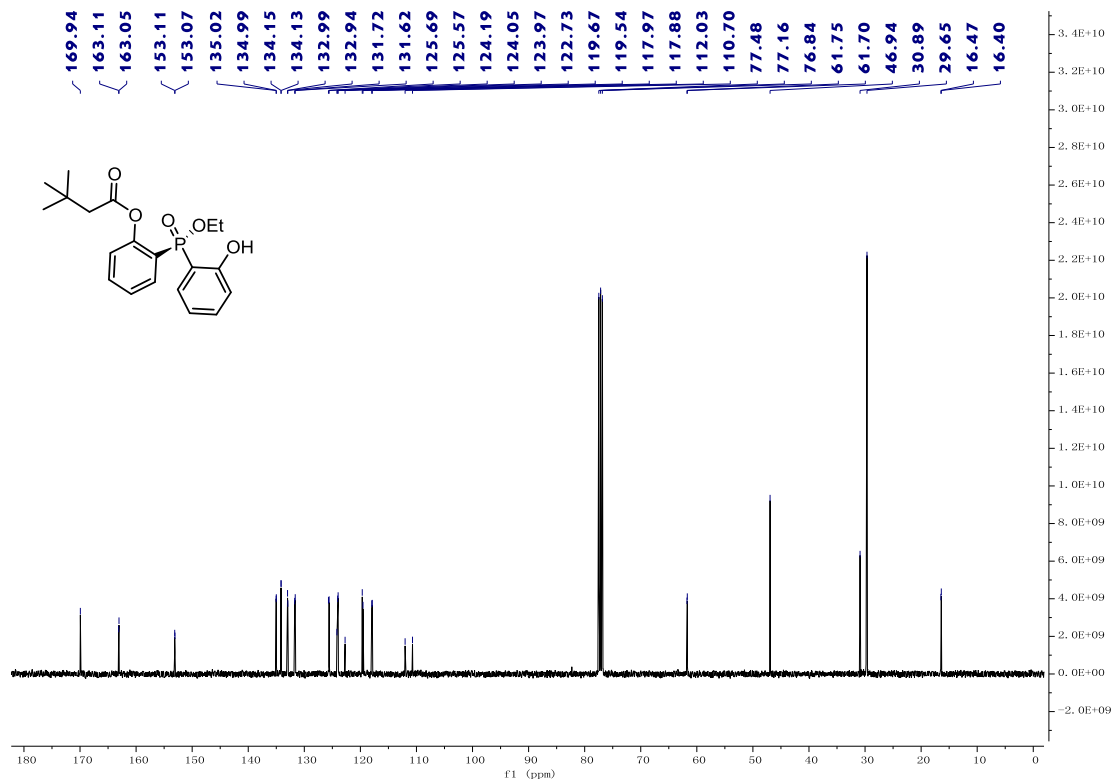



<sup>31</sup>P-NMR(162 MHZ, CDCl<sub>3</sub>) Spectrum of 3ga

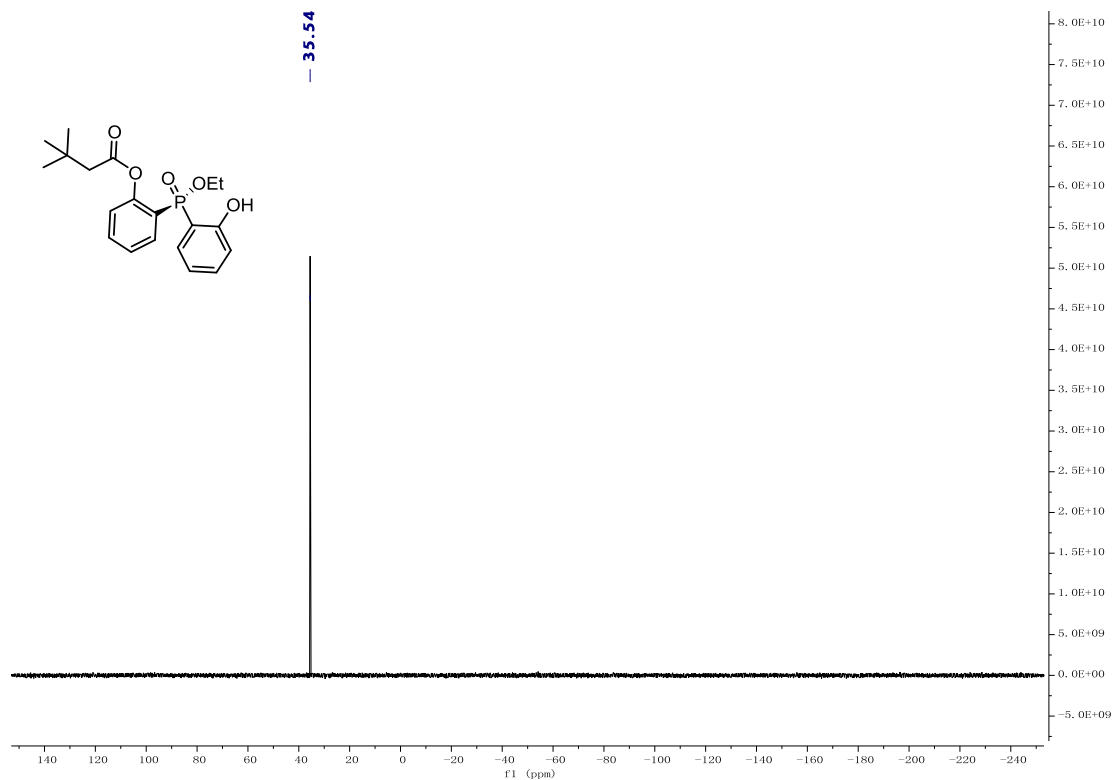

<sup>1</sup>H-NMR(400 MHZ, CDCl<sub>3</sub>) Spectrum of 3ha

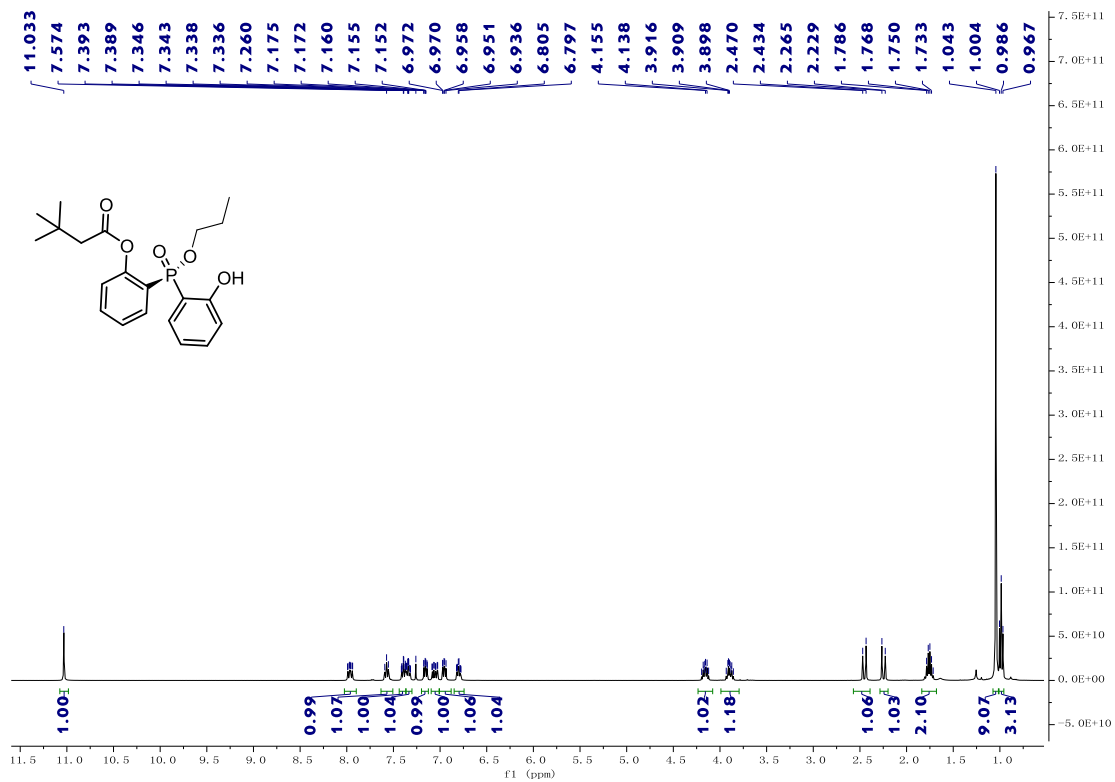

**<sup>13</sup>C-NMR(100 MHZ, CDCl<sub>3</sub>) Spectrum of 3ha**

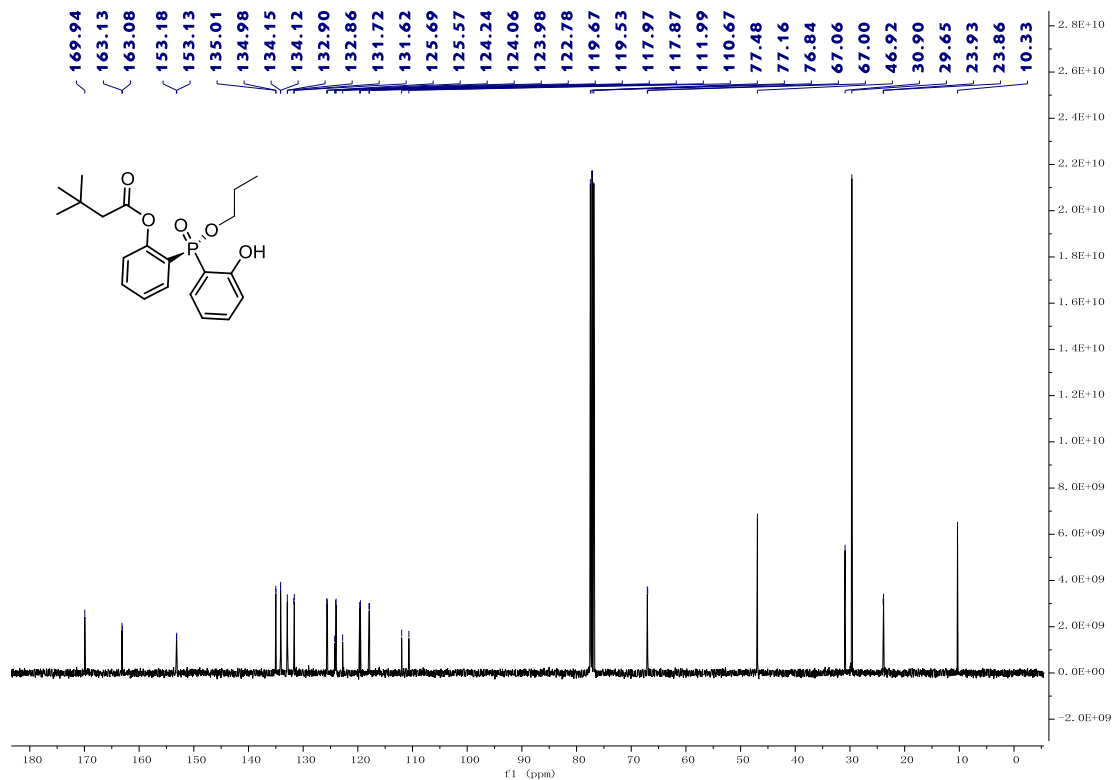

**<sup>31</sup>P-NMR(162 MHZ, CDCl<sub>3</sub>) Spectrum of 3ha**

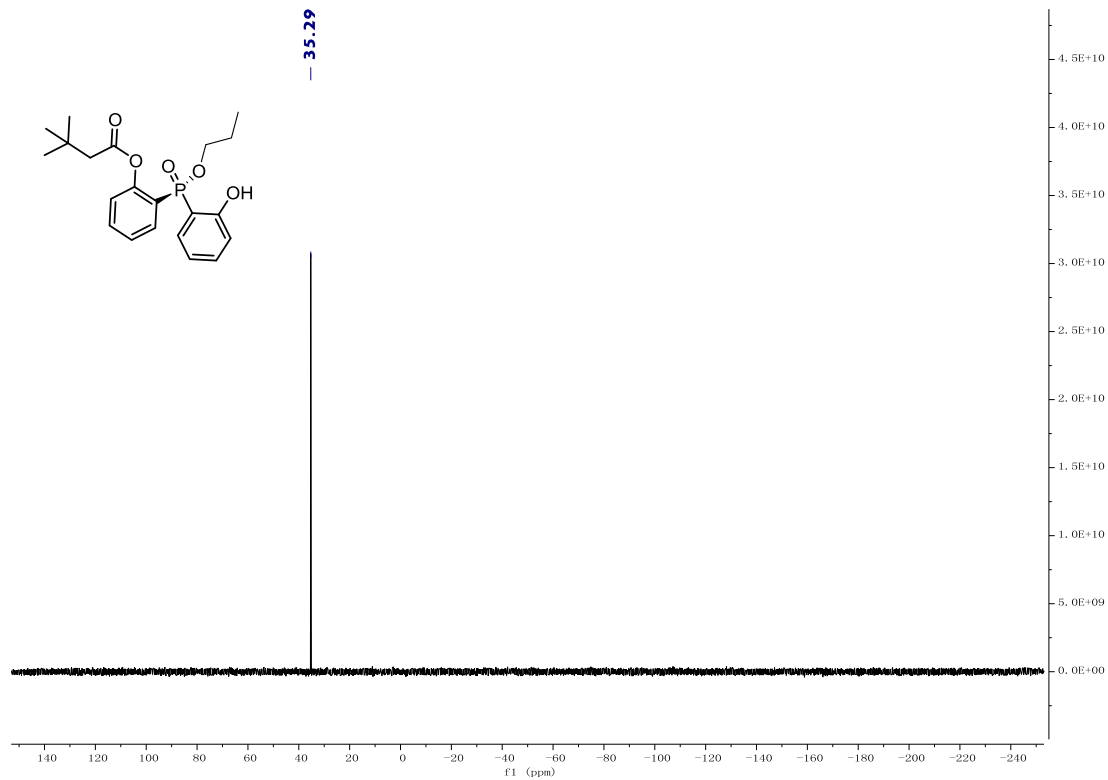

### <sup>1</sup>H-NMR(600 MHZ, CDCl<sub>3</sub>) Spectrum of 3ia

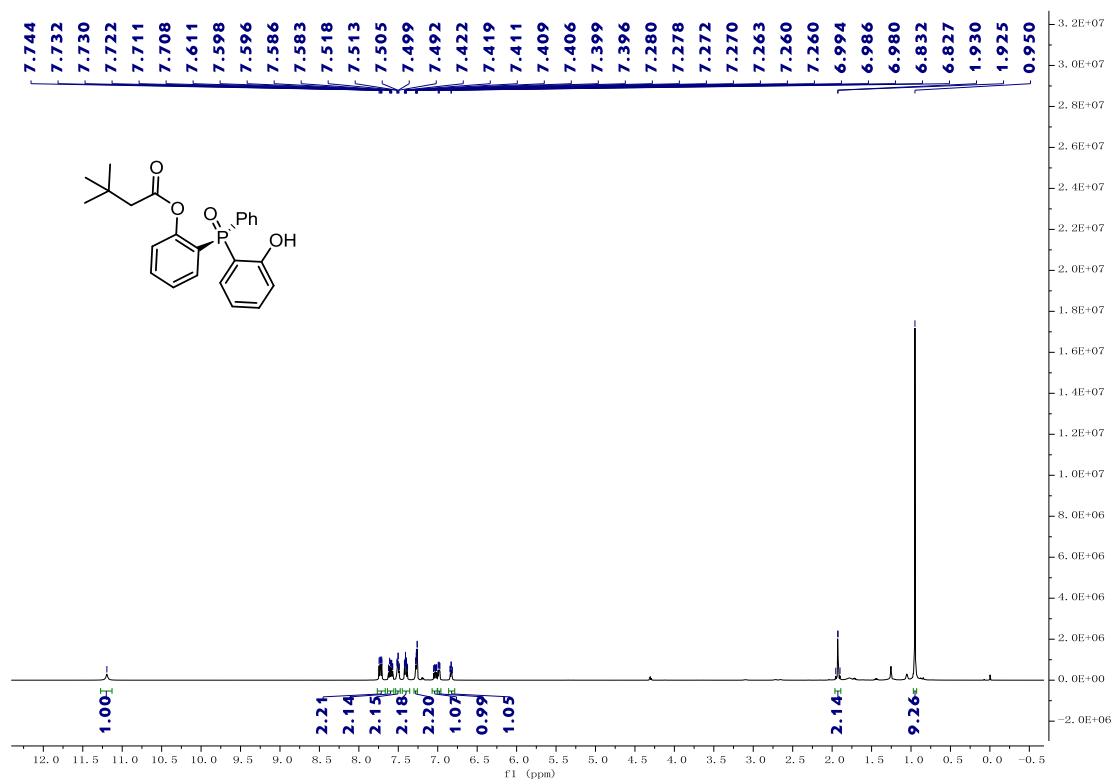

### <sup>13</sup>C-NMR(100 MHZ, CDCl<sub>3</sub>) Spectrum of 3ia

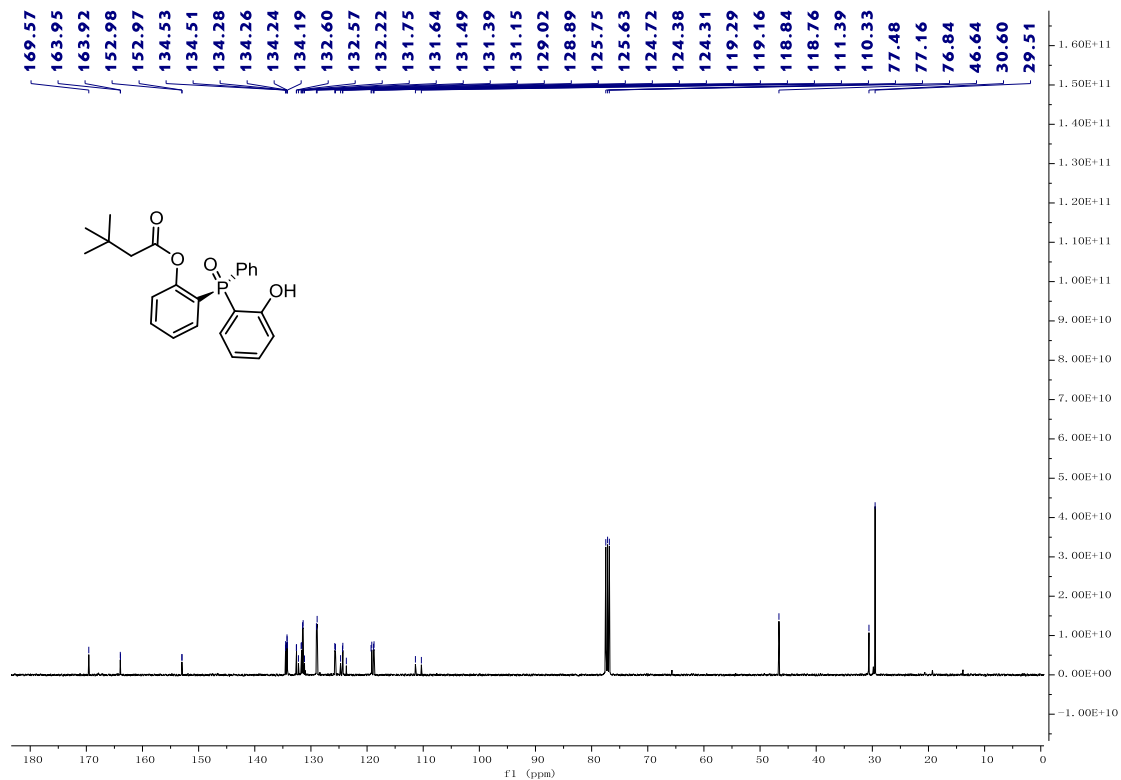

**<sup>31</sup>P-NMR(162 MHZ, CDCl<sub>3</sub>) Spectrum of 3ia**

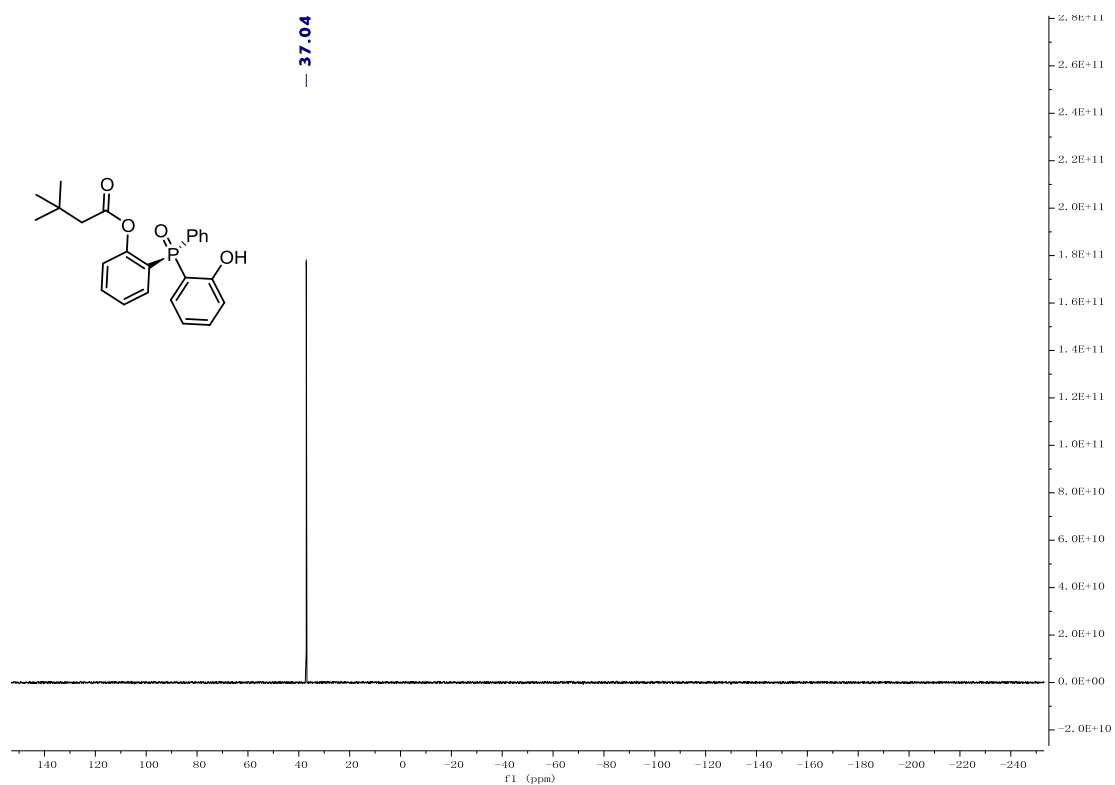

**<sup>1</sup>H-NMR(400 MHZ, CDCl<sub>3</sub>) Spectrum of 4aa**

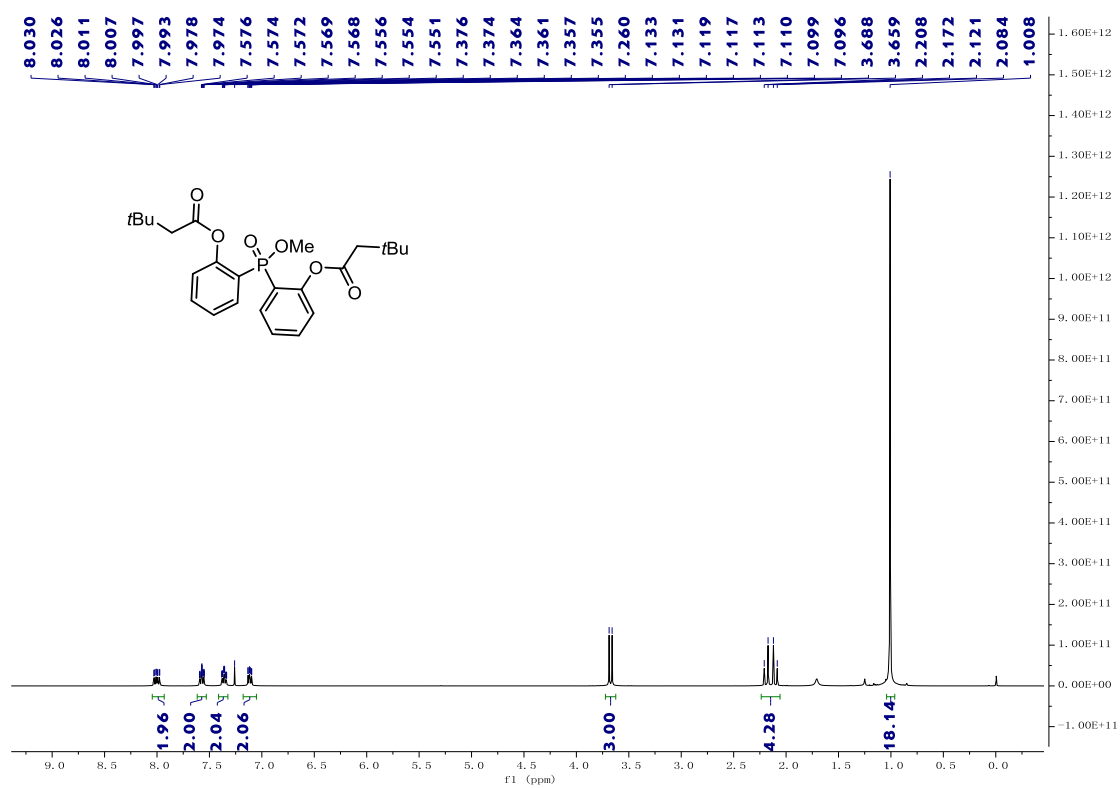

### <sup>13</sup>C-NMR(100 MHZ, CDCl<sub>3</sub>) Spectrum of 4aa

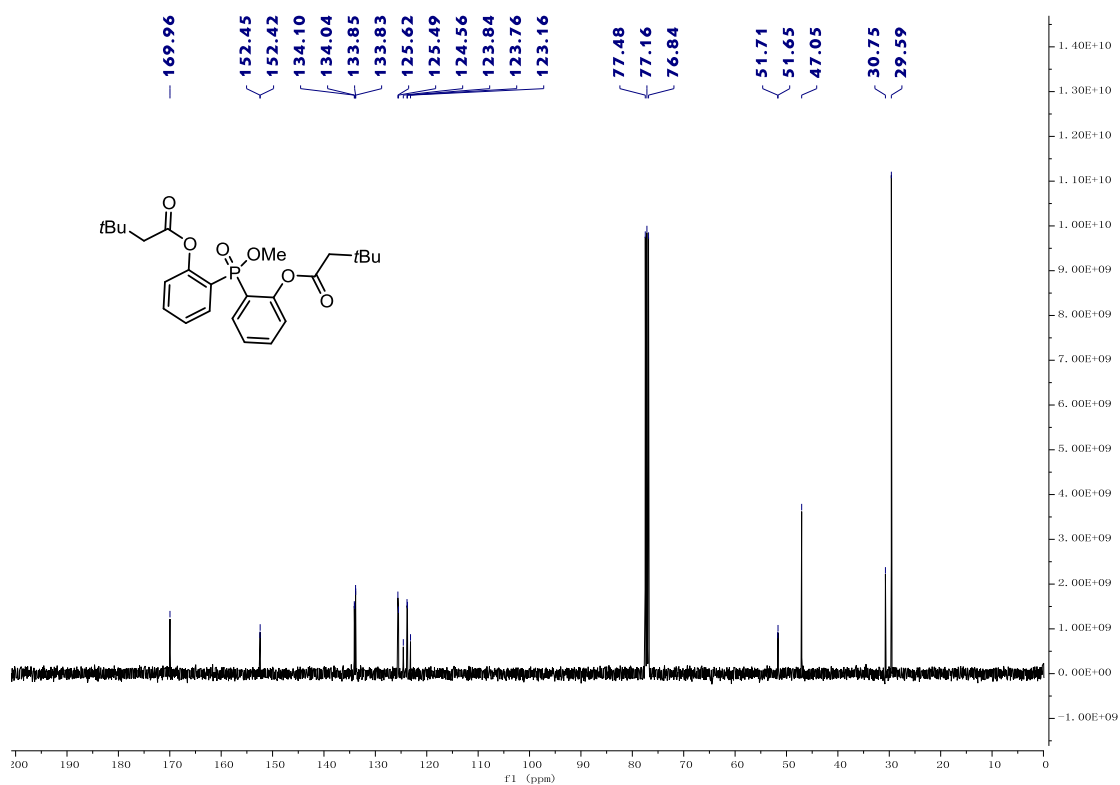

### <sup>31</sup>P-NMR(162 MHZ, CDCl<sub>3</sub>) Spectrum of 4aa

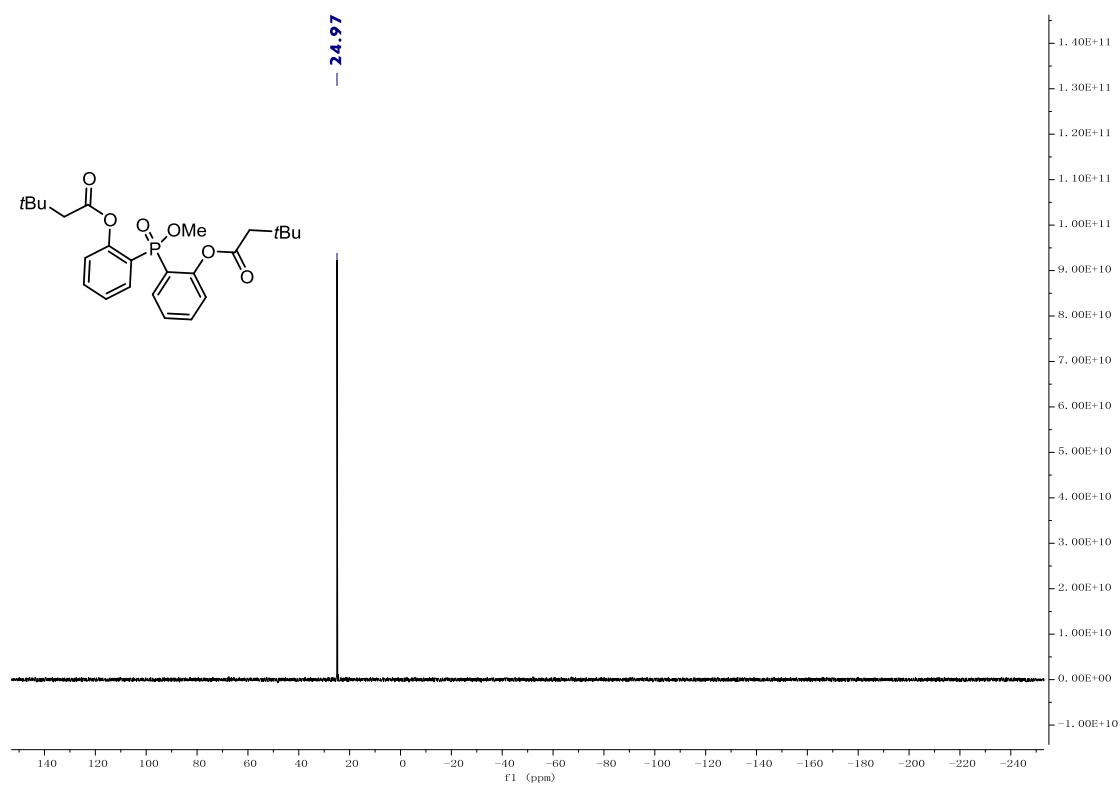

**<sup>1</sup>H-NMR(400 MHz, CDCl<sub>3</sub>) Spectrum of C21**

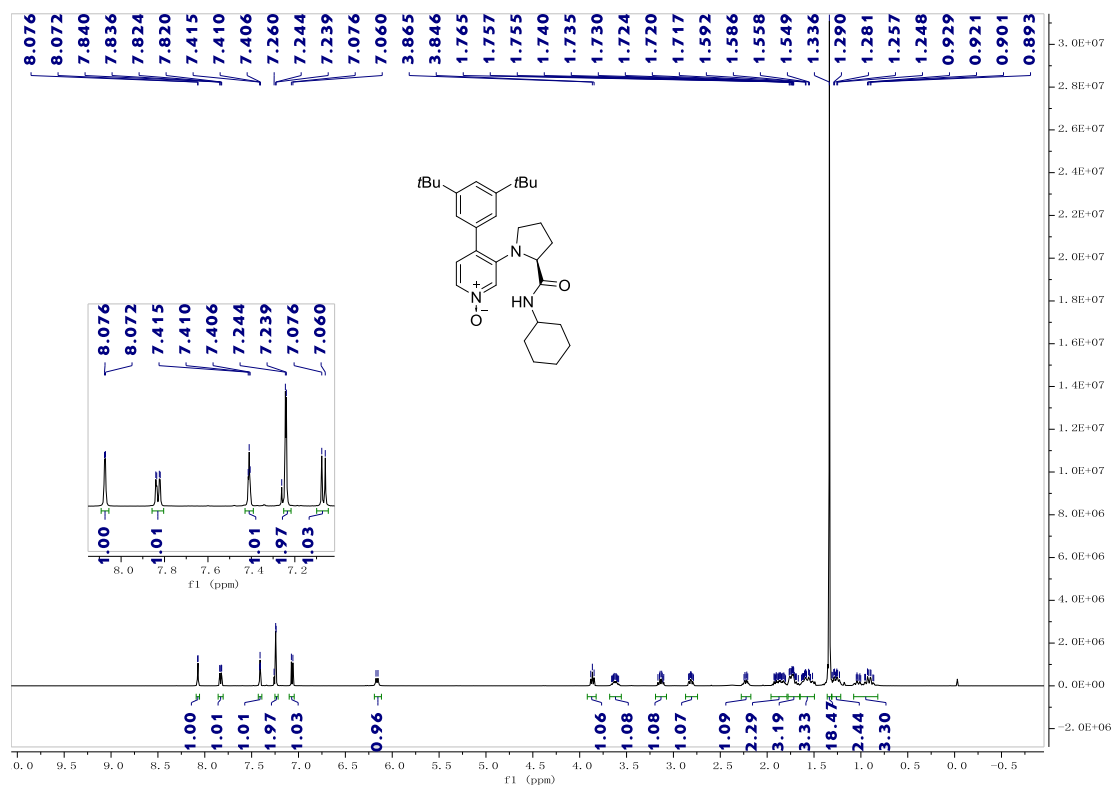

**<sup>13</sup>C-NMR(100 MHz, CDCl<sub>3</sub>) Spectrum of C21**

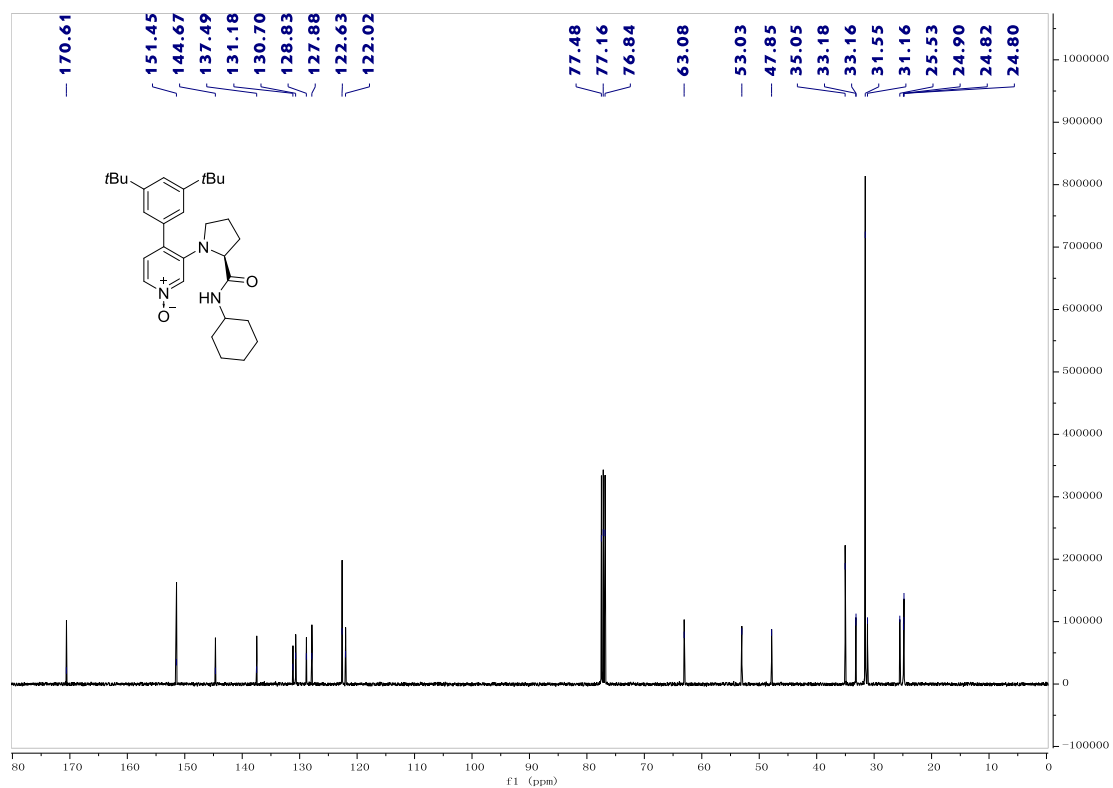

### <sup>1</sup>H-NMR(400 MHZ, CDCl<sub>3</sub>) Spectrum of 3ao

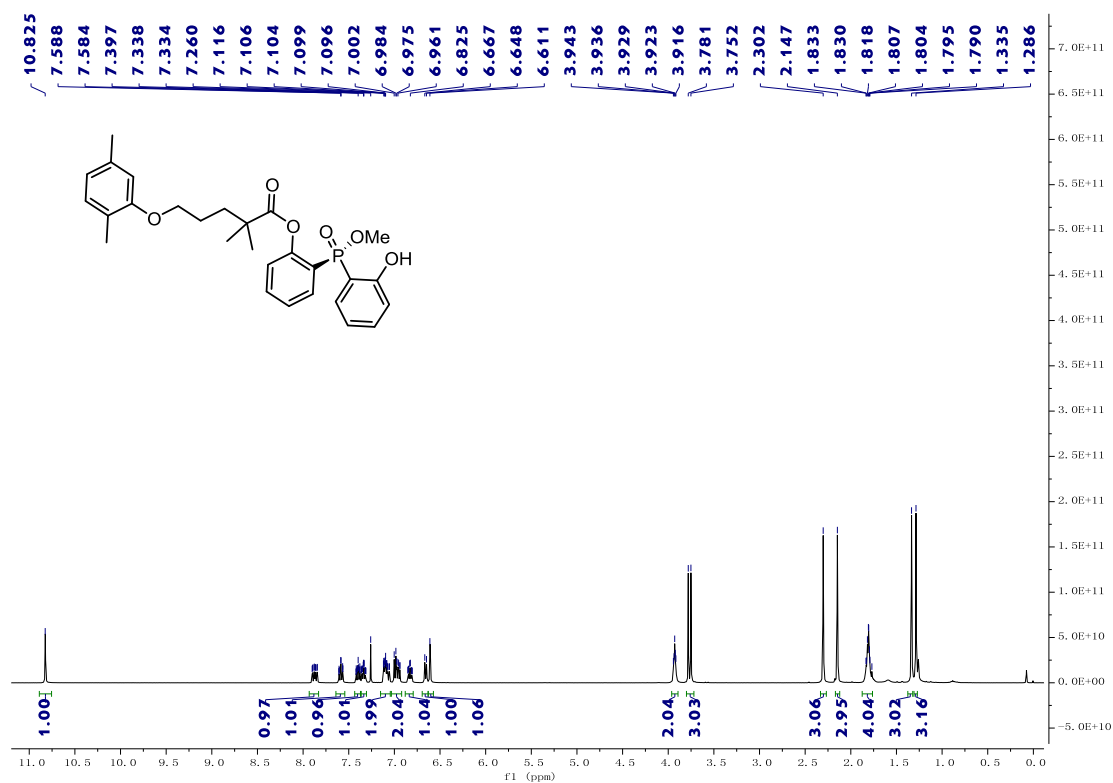

### <sup>13</sup>C-NMR(150 MHZ, CDCl<sub>3</sub>) Spectrum of 3ao

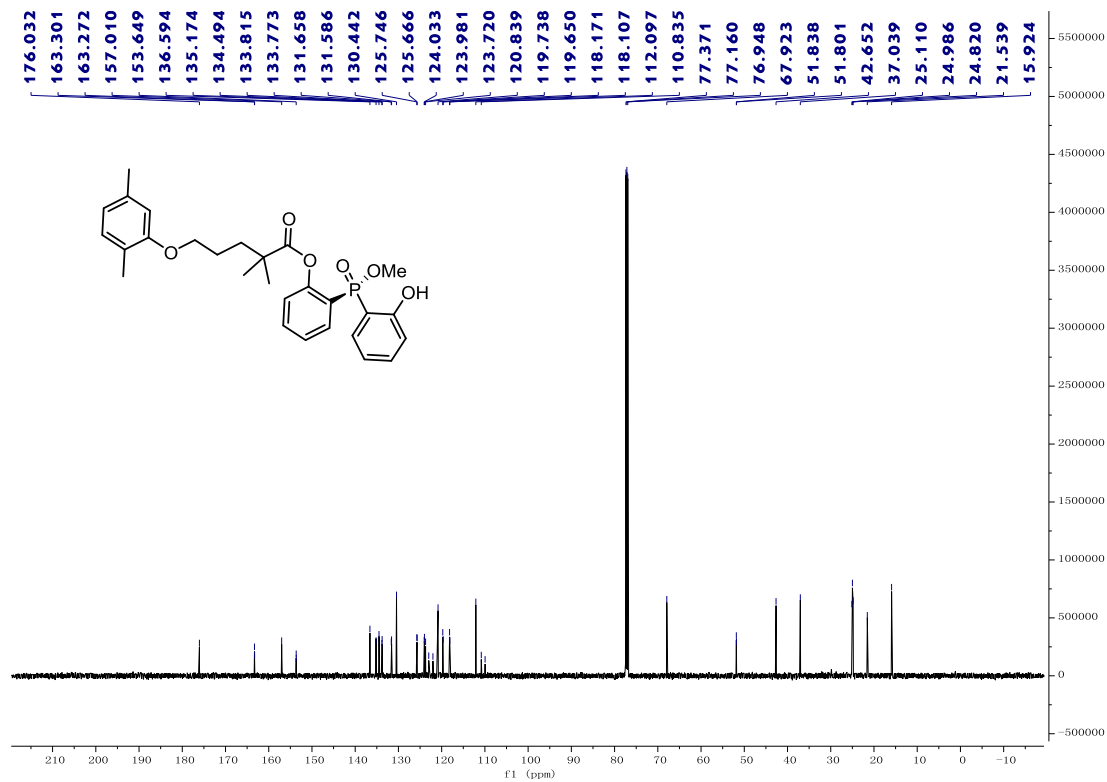

**<sup>31</sup>P-NMR(162 MHZ, CDCl<sub>3</sub>) Spectrum of 3ao**

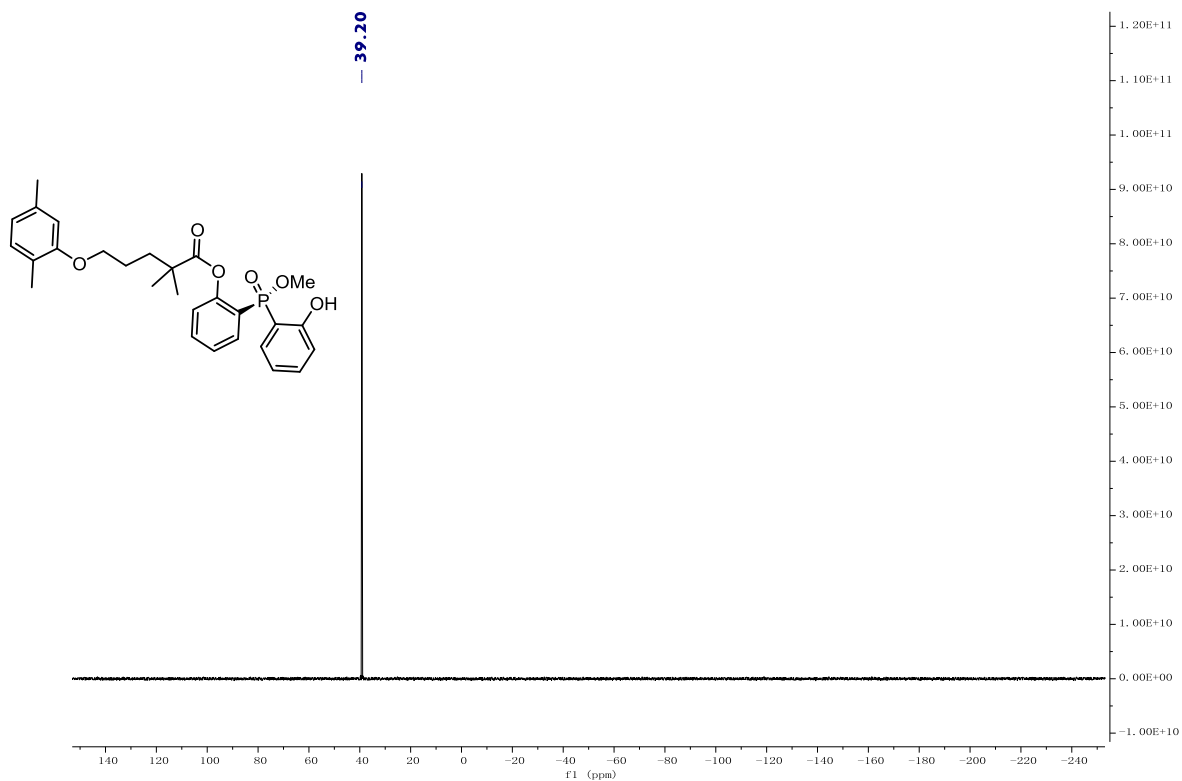

**<sup>1</sup>H-NMR(600 MHZ, CDCl<sub>3</sub>) Spectrum of 3ap**

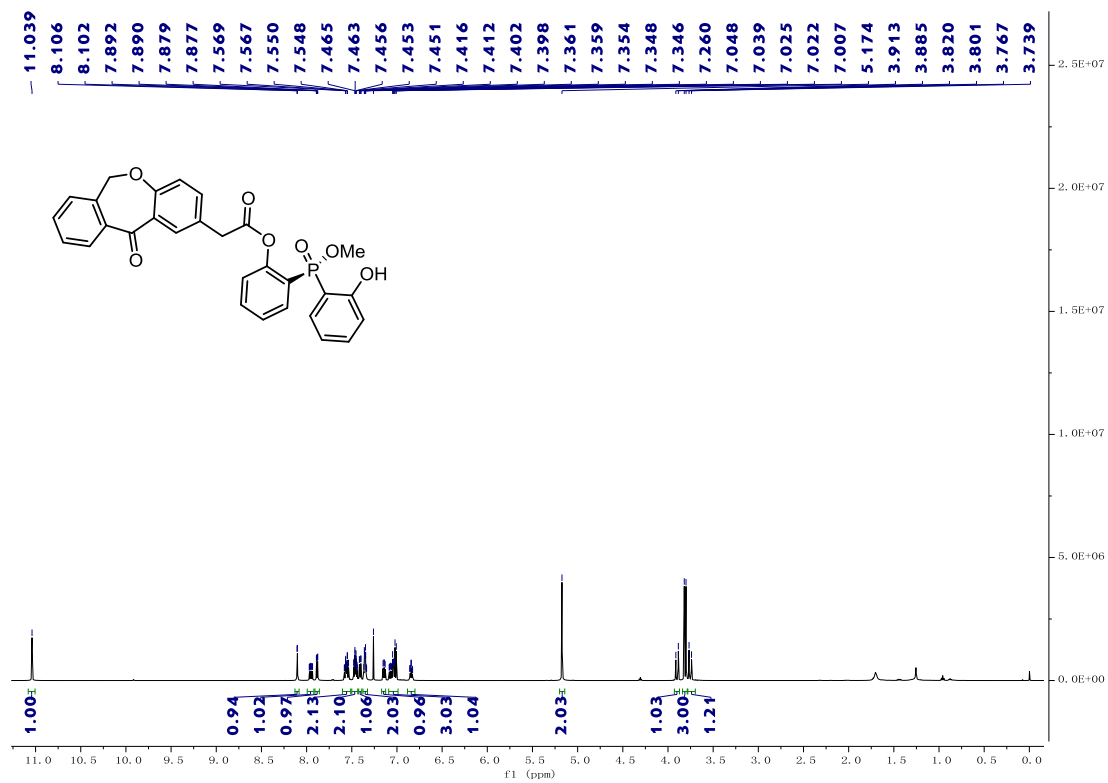



### <sup>13</sup>C-NMR(100 MHZ, CDCl<sub>3</sub>) Spectrum of 3ap

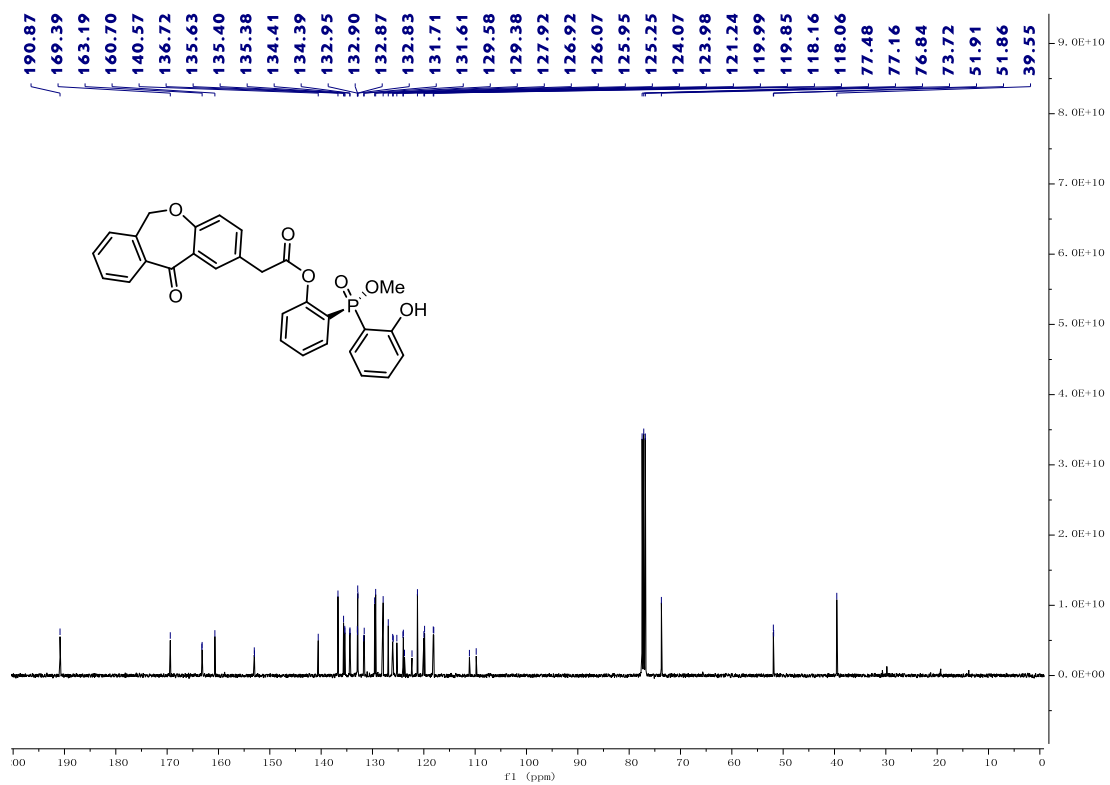

### <sup>31</sup>P-NMR(162 MHZ, CDCl<sub>3</sub>) Spectrum of 3ap

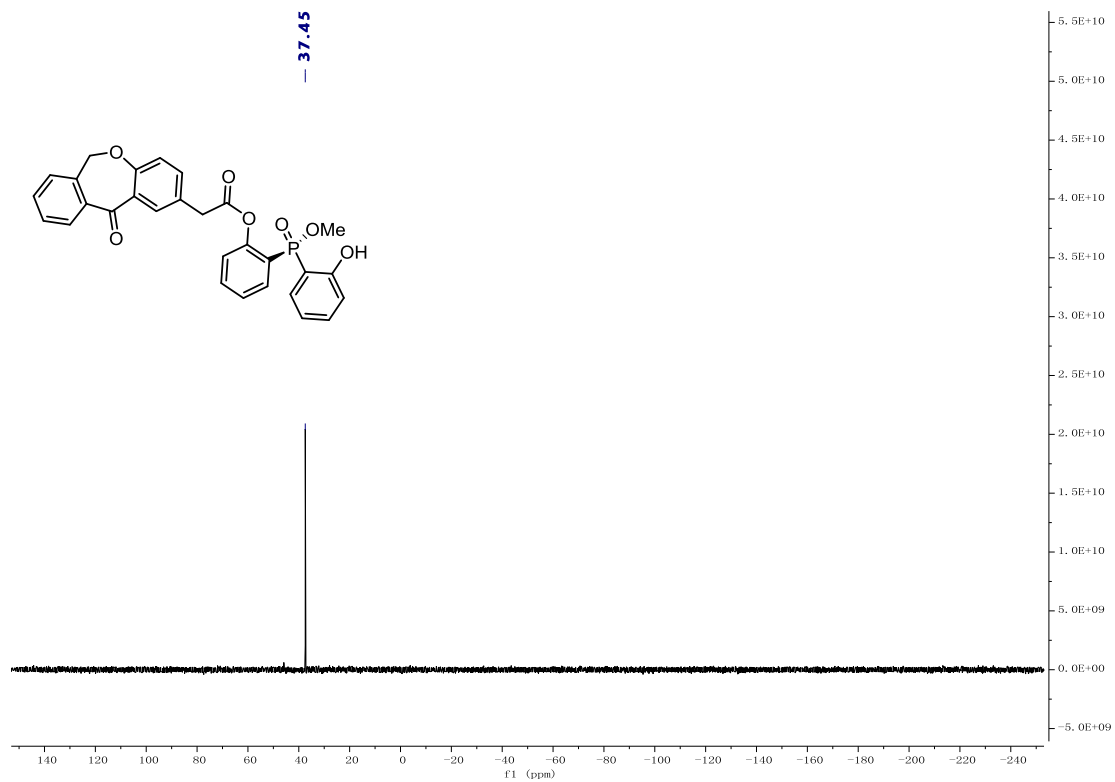

### <sup>1</sup>H-NMR(400 MHZ, CDCl<sub>3</sub>) Spectrum of 3aq

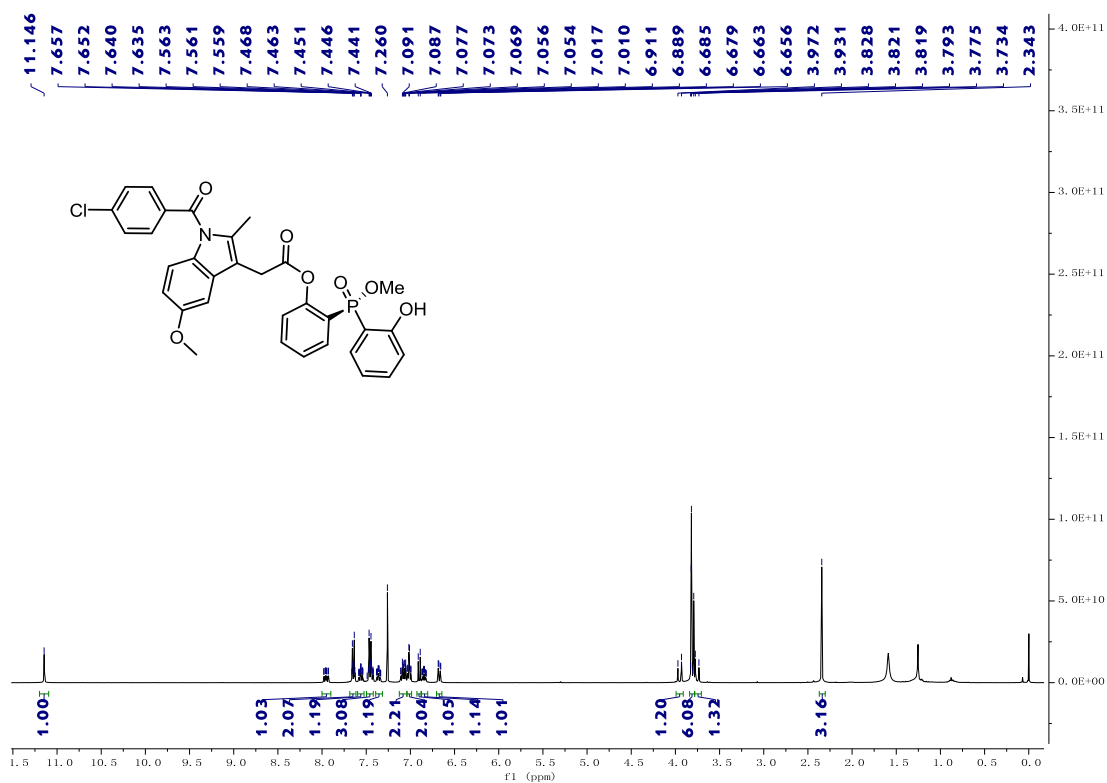

### <sup>13</sup>C-NMR(100 MHZ, CDCl<sub>3</sub>) Spectrum of 3aq

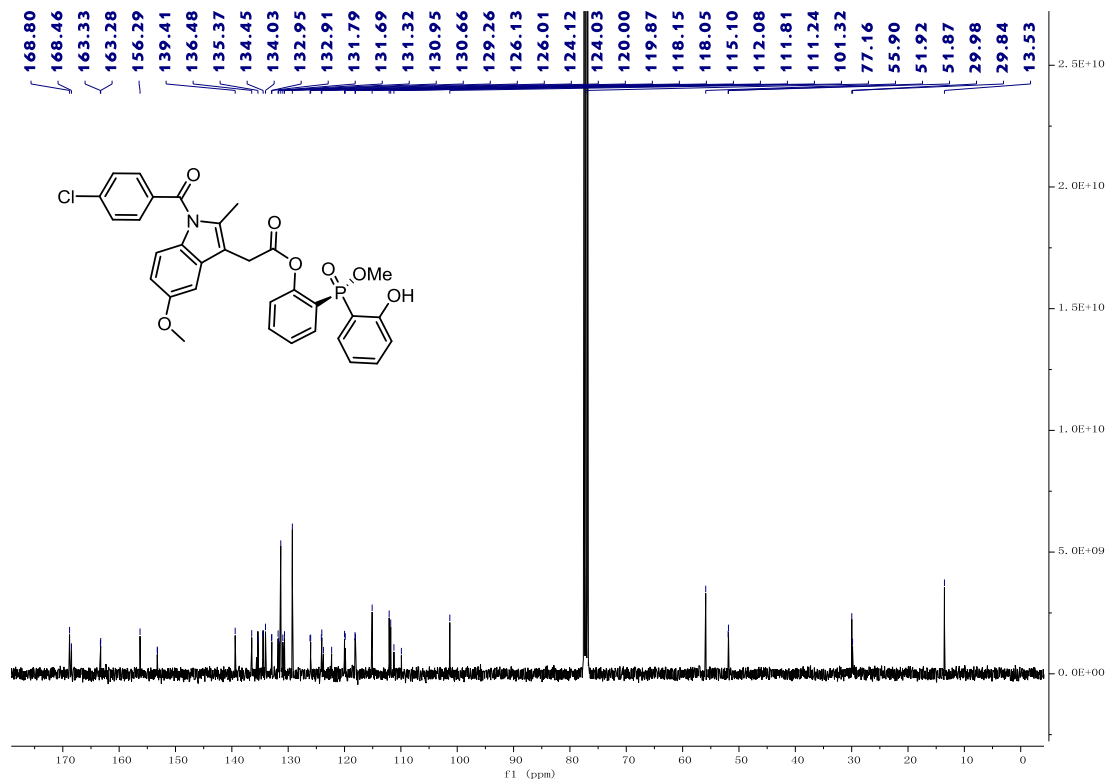

**<sup>31</sup>P-NMR(162 MHZ, CDCl<sub>3</sub>) Spectrum of 3aq**

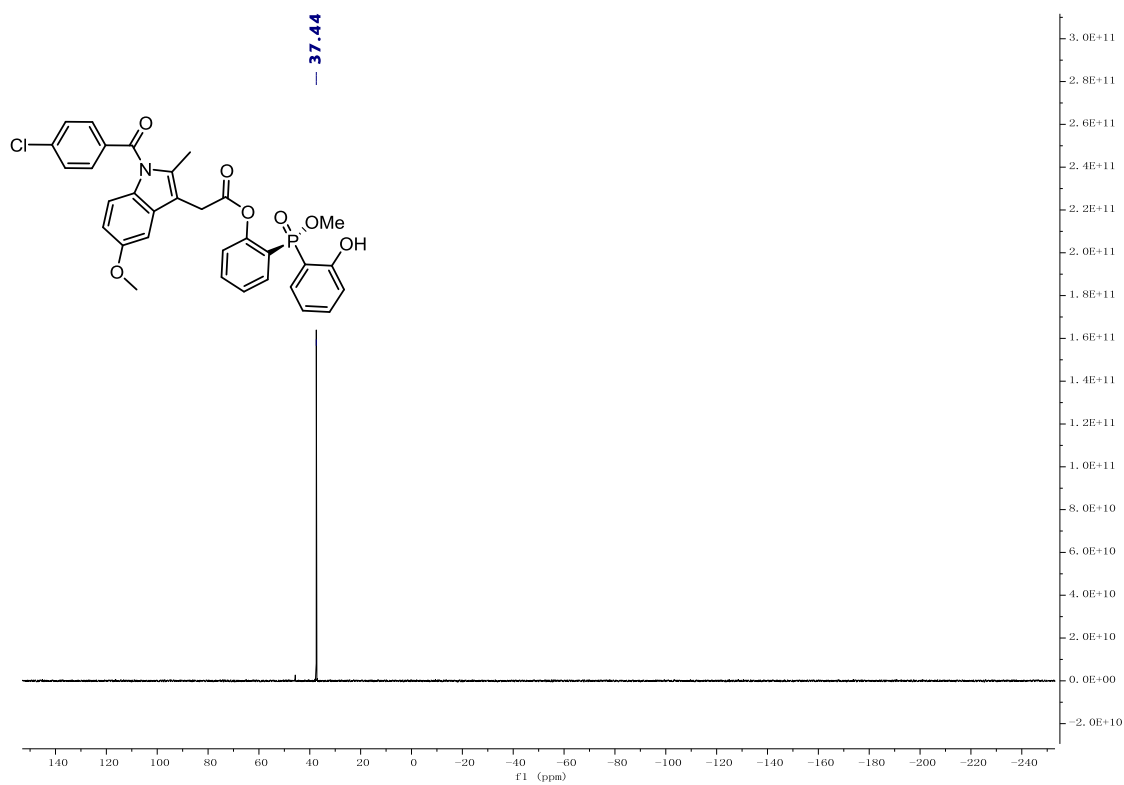

## HPLC spectra of 3aa

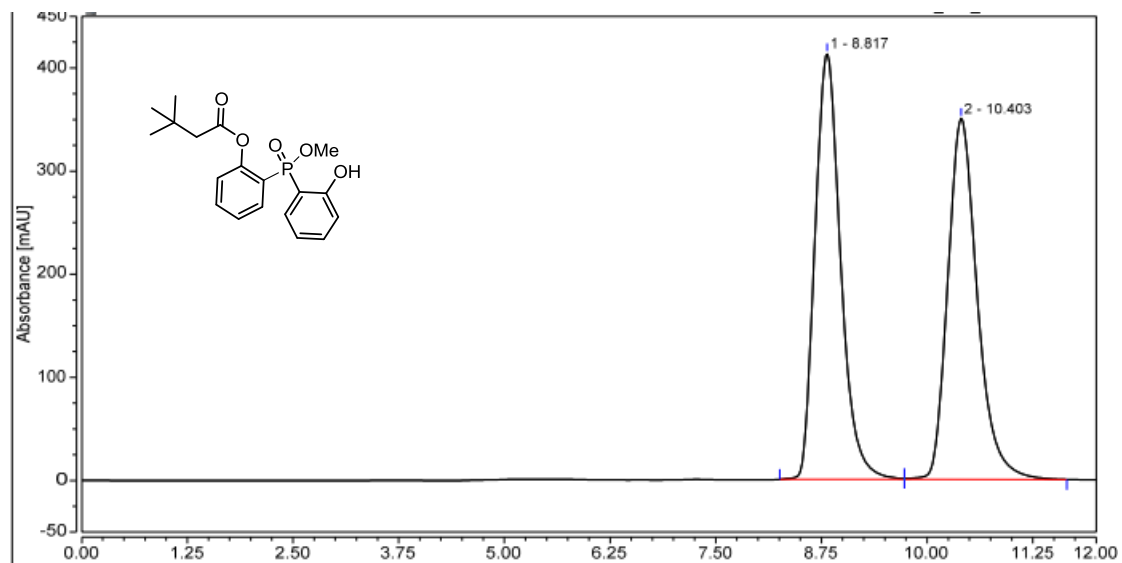

| Peak          | Retention min | Area mAU*min   | Height mAU     | Area %        | Height %      |
|---------------|---------------|----------------|----------------|---------------|---------------|
| 1             | 8.817         | 145.216        | 412.821        | 50.55         | 54.11         |
| 2             | 10.403        | 142.050        | 350.133        | 49.45         | 45.89         |
| <b>Total:</b> |               | <b>287.266</b> | <b>762.955</b> | <b>100.00</b> | <b>100.00</b> |

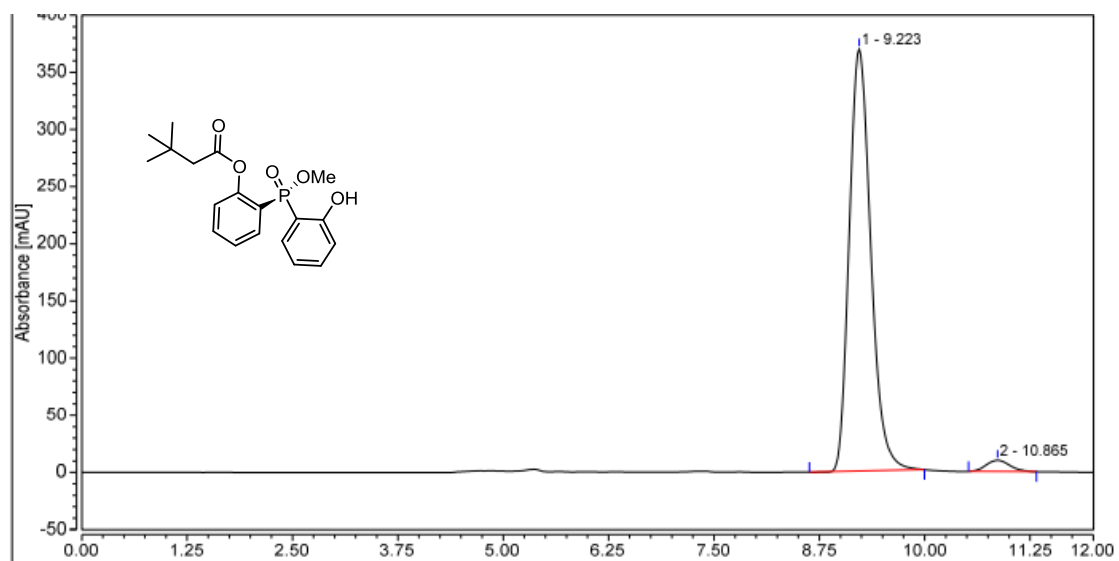

| Peak          | Retention Time min | Area mAU*min   | Height mAU     | Area %        | Height %      |
|---------------|--------------------|----------------|----------------|---------------|---------------|
| 1             | 9.223              | 109.182        | 369.411        | 97.16         | 97.41         |
| 2             | 10.865             | 3.197          | 9.828          | 2.84          | 2.59          |
| <b>Total:</b> |                    | <b>112.379</b> | <b>379.239</b> | <b>100.00</b> | <b>100.00</b> |

## HPLC spectra of 3ab

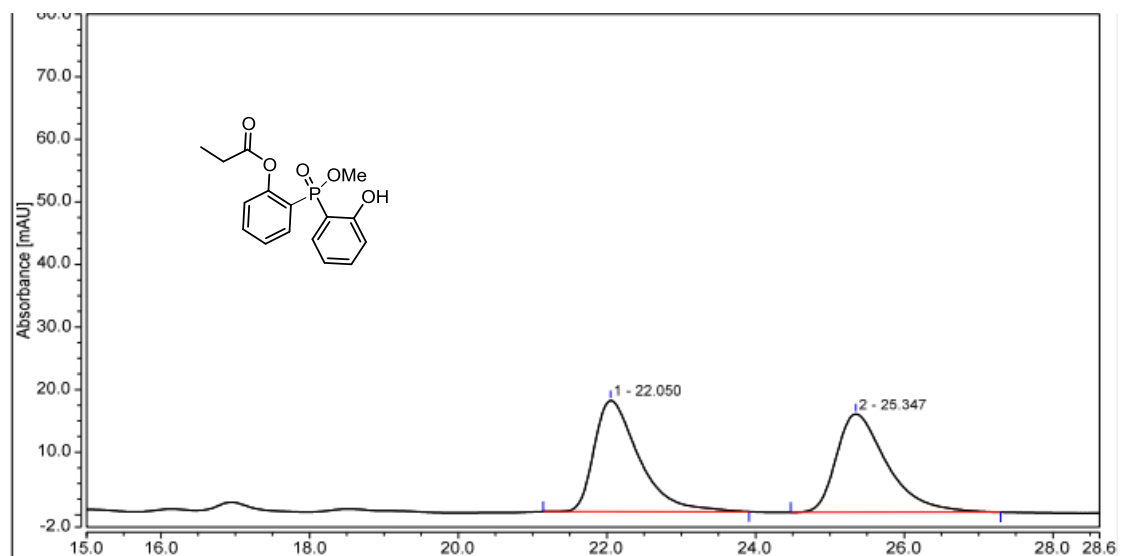

| Peak          | Retention Time min | Area mAU*min  | Height mAU    | Area %        | Height %      |
|---------------|--------------------|---------------|---------------|---------------|---------------|
| 1             | 22.050             | 12.511        | 17.762        | 49.88         | 53.02         |
| 2             | 25.347             | 12.572        | 15.739        | 50.12         | 46.98         |
| <b>Total:</b> |                    | <b>25.083</b> | <b>33.501</b> | <b>100.00</b> | <b>100.00</b> |

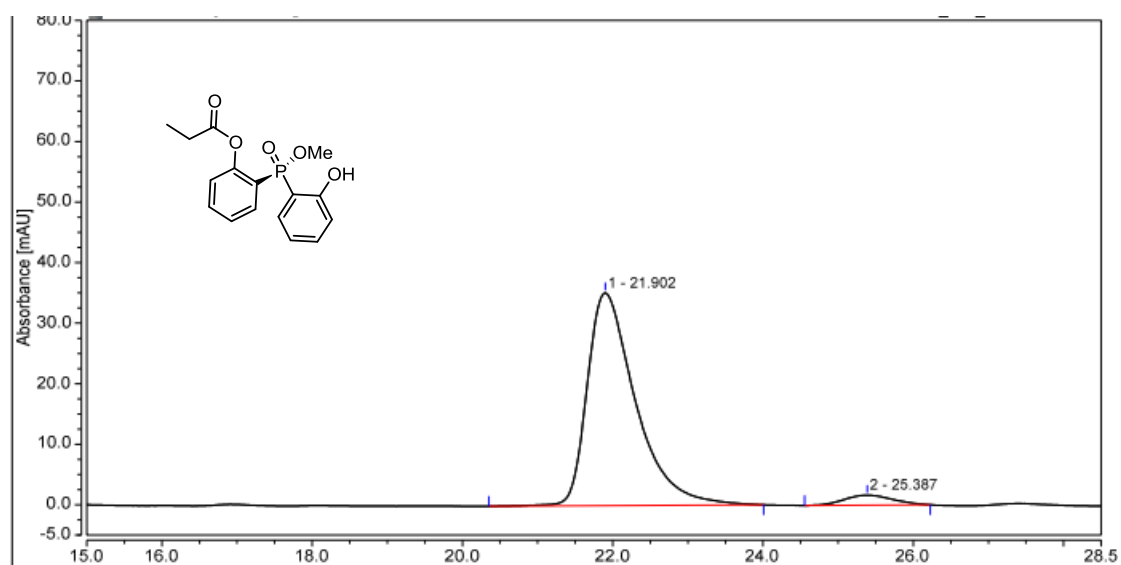

| Peak          | Retention Time min | Area mAU*min  | Height mAU    | Area %        | Height %      |
|---------------|--------------------|---------------|---------------|---------------|---------------|
| 1             | 21.902             | 26.258        | 35.141        | 95.40         | 95.46         |
| 2             | 25.387             | 1.265         | 1.670         | 4.60          | 4.54          |
| <b>Total:</b> |                    | <b>27.523</b> | <b>36.811</b> | <b>100.00</b> | <b>100.00</b> |

## HPLC spectra of 3ac

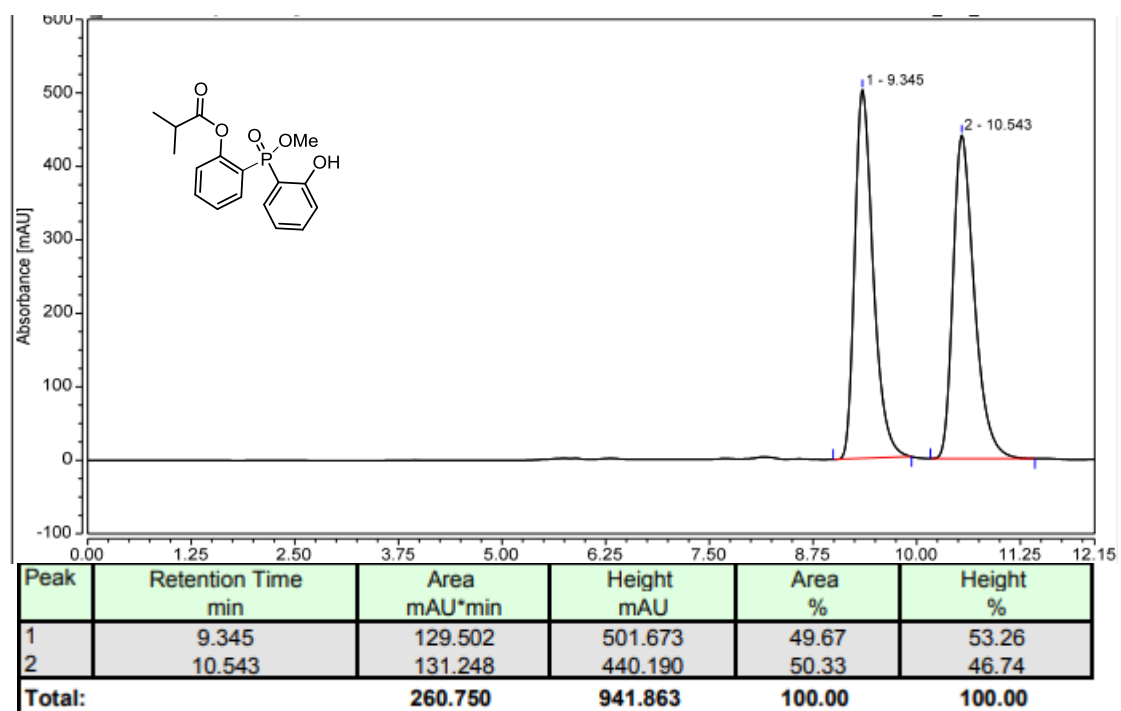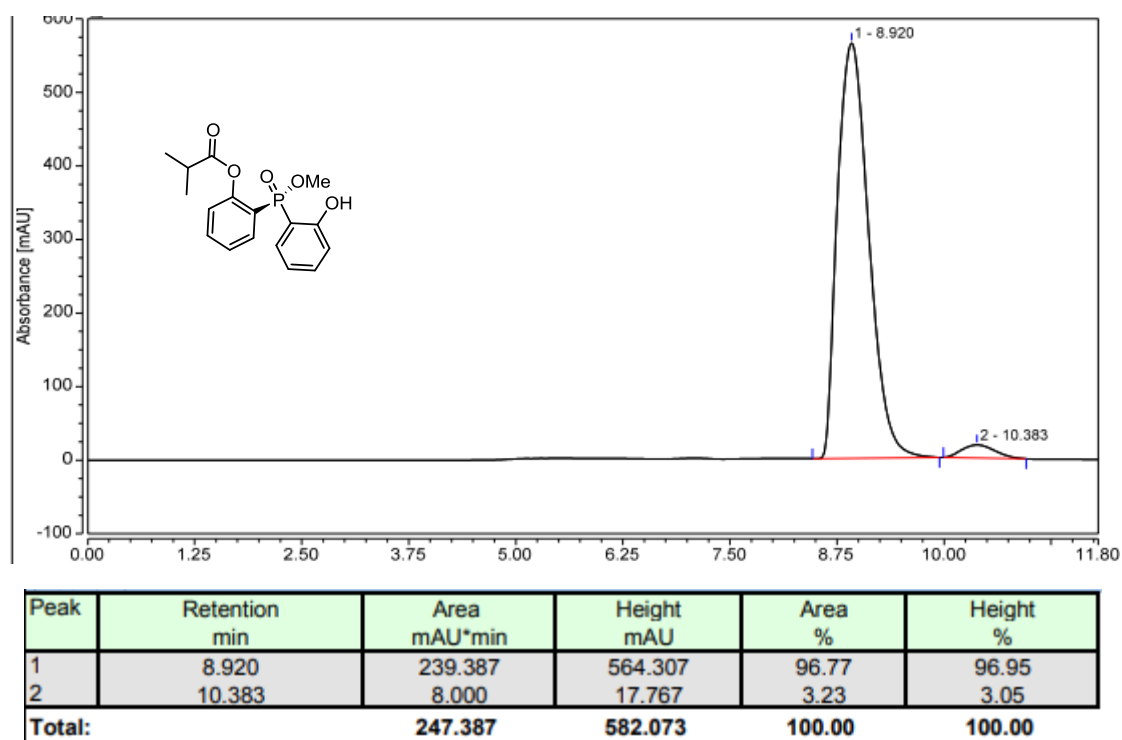

## HPLC spectra of 3ad

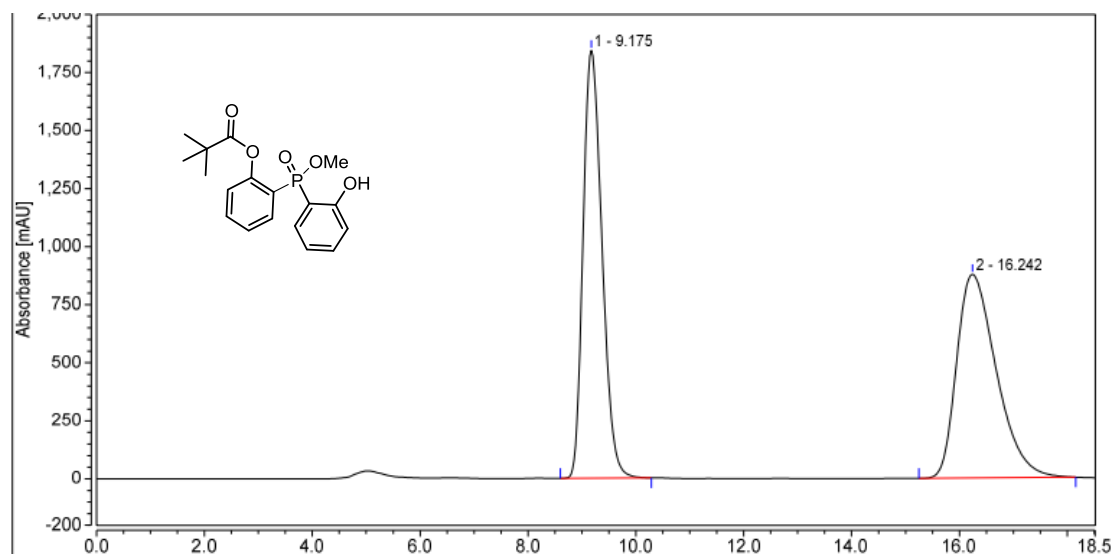

| Peak          | Retention time<br>min | Area<br>mAU*min | Height<br>mAU   | Area<br>%     | Height<br>%   |
|---------------|-----------------------|-----------------|-----------------|---------------|---------------|
| 1             | 9.175                 | 747.199         | 1842.141        | 50.02         | 67.74         |
| 2             | 16.242                | 746.460         | 877.450         | 49.98         | 32.26         |
| <b>Total:</b> |                       | <b>1493.659</b> | <b>2719.591</b> | <b>100.00</b> | <b>100.00</b> |

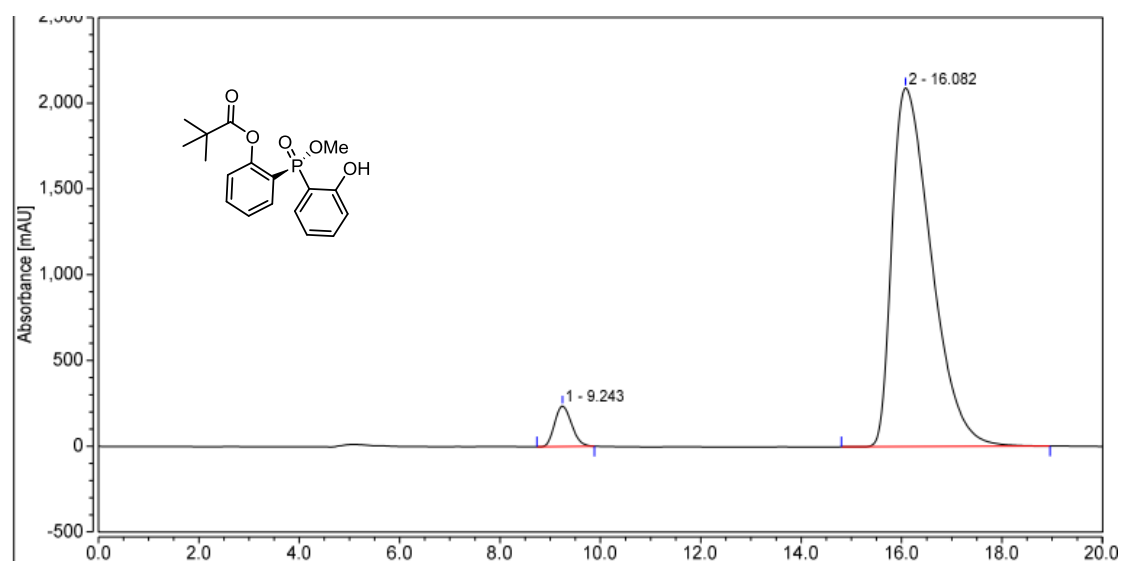

| Peak          | Retention time<br>min | Area<br>mAU*min | Height<br>mAU   | Area<br>%     | Height<br>%   |
|---------------|-----------------------|-----------------|-----------------|---------------|---------------|
| 1             | 9.243                 | 92.666          | 236.196         | 4.67          | 10.14         |
| 2             | 16.082                | 1891.595        | 2092.129        | 95.33         | 89.86         |
| <b>Total:</b> |                       | <b>1984.260</b> | <b>2328.325</b> | <b>100.00</b> | <b>100.00</b> |

## HPLC spectra of 3ae

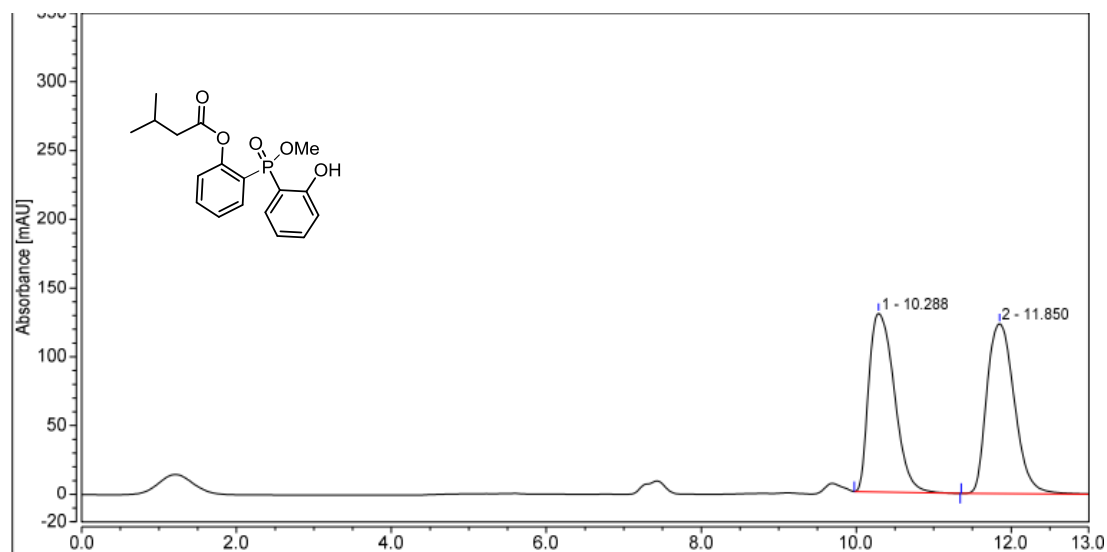

| Peak          | Retention time<br>min | Area<br>mAU*min | Height<br>mAU  | Area<br>%     | Height<br>%   |
|---------------|-----------------------|-----------------|----------------|---------------|---------------|
| 1             | 10.288                | 49.630          | 129.906        | 49.30         | 51.28         |
| 2             | 11.850                | 51.038          | 123.445        | 50.70         | 48.72         |
| <b>Total:</b> |                       | <b>100.668</b>  | <b>253.350</b> | <b>100.00</b> | <b>100.00</b> |

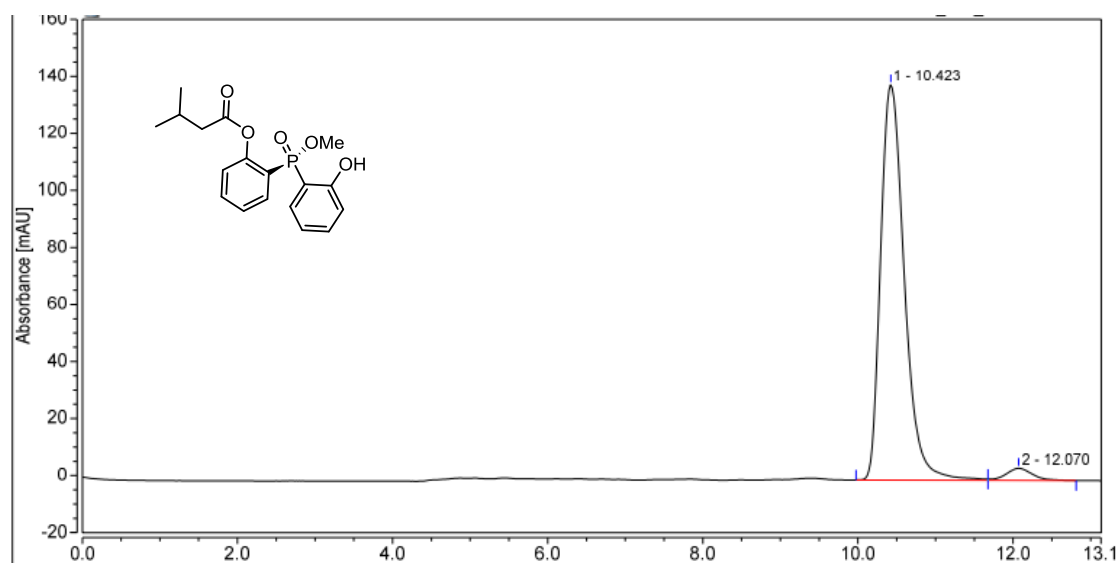

| Peak          | Retention time<br>min | Area<br>mAU*min | Height<br>mAU  | Area<br>%     | Height<br>%   |
|---------------|-----------------------|-----------------|----------------|---------------|---------------|
| 1             | 10.423                | 49.026          | 138.606        | 96.78         | 97.05         |
| 2             | 12.070                | 1.632           | 4.216          | 3.22          | 2.95          |
| <b>Total:</b> |                       | <b>50.658</b>   | <b>142.821</b> | <b>100.00</b> | <b>100.00</b> |



## HPLC spectra of 3af

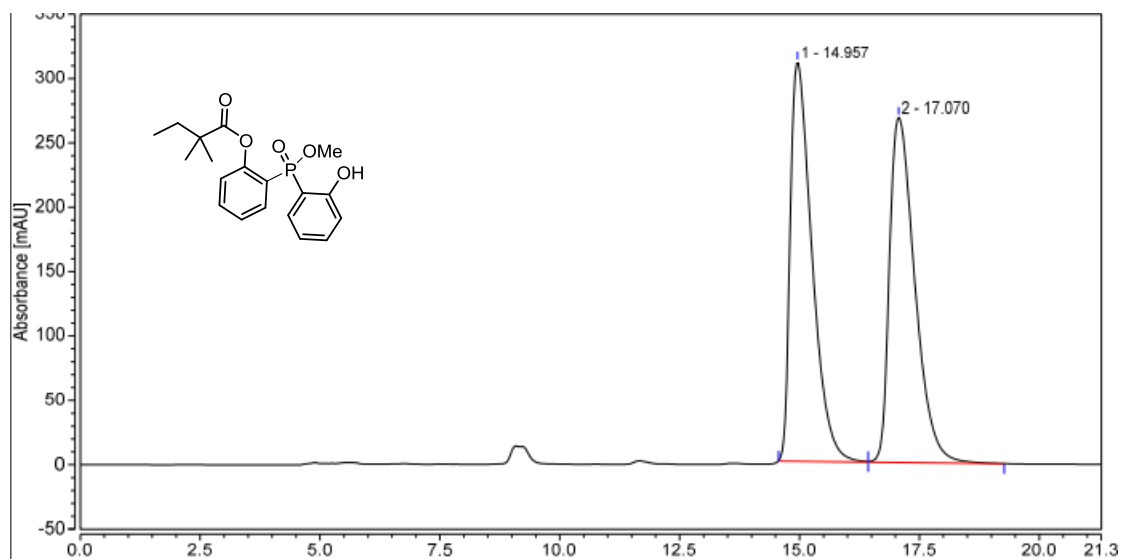

| Peak          | Retention Time min | Area mAU*min   | Height mAU     | Area %        | Height %      |
|---------------|--------------------|----------------|----------------|---------------|---------------|
| 1             | 14.957             | 162.727        | 310.186        | 49.77         | 53.63         |
| 2             | 17.070             | 164.225        | 268.210        | 50.23         | 46.37         |
| <b>Total:</b> |                    | <b>326.952</b> | <b>578.395</b> | <b>100.00</b> | <b>100.00</b> |

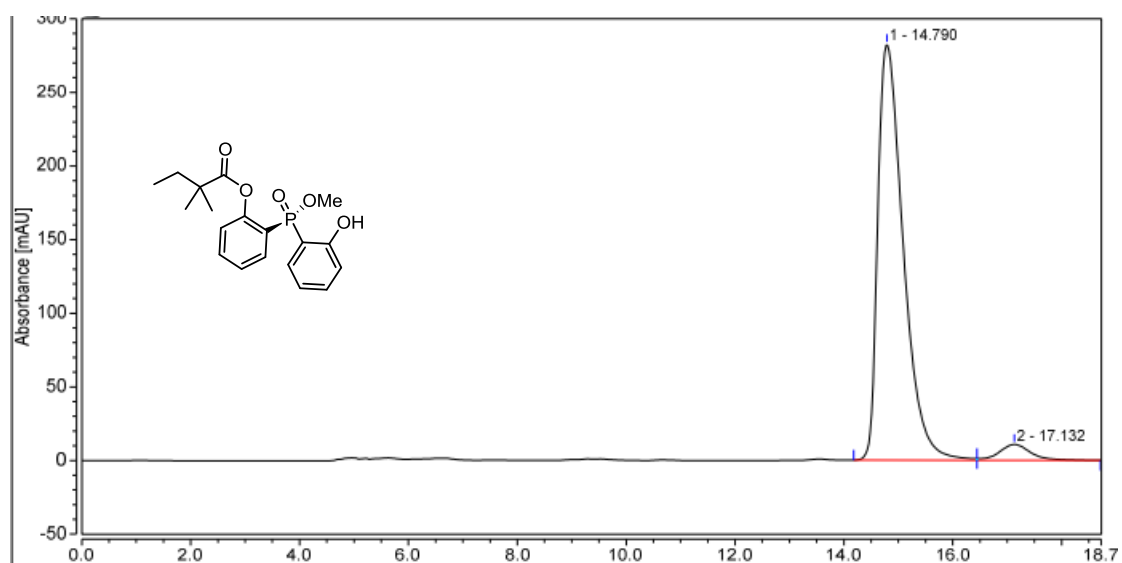

| Peak          | Retention Time min | Area mAU*min   | Height mAU     | Area %        | Height %      |
|---------------|--------------------|----------------|----------------|---------------|---------------|
| 1             | 14.790             | 153.251        | 282.334        | 95.51         | 96.35         |
| 2             | 17.132             | 7.198          | 10.707         | 4.49          | 3.65          |
| <b>Total:</b> |                    | <b>160.449</b> | <b>293.041</b> | <b>100.00</b> | <b>100.00</b> |

## HPLC spectra of 3ag

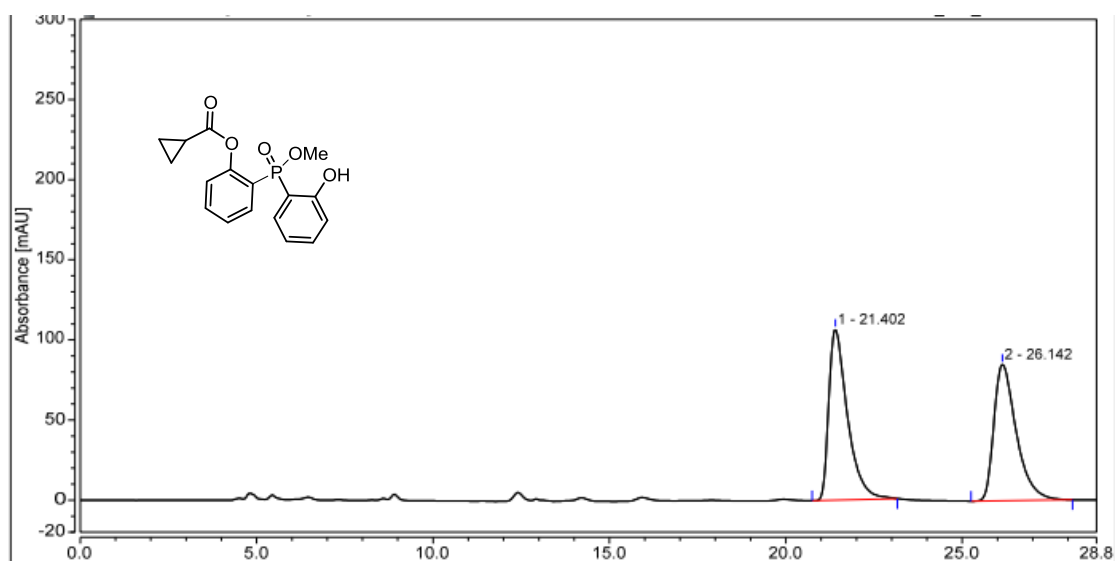

| Peak          | Retention Time min | Area mAU*min   | Height mAU     | Area %        | Height %      |
|---------------|--------------------|----------------|----------------|---------------|---------------|
| 1             | 21.402             | 65.534         | 106.664        | 51.09         | 55.63         |
| 2             | 26.142             | 62.743         | 85.061         | 48.91         | 44.37         |
| <b>Total:</b> |                    | <b>128.277</b> | <b>191.725</b> | <b>100.00</b> | <b>100.00</b> |

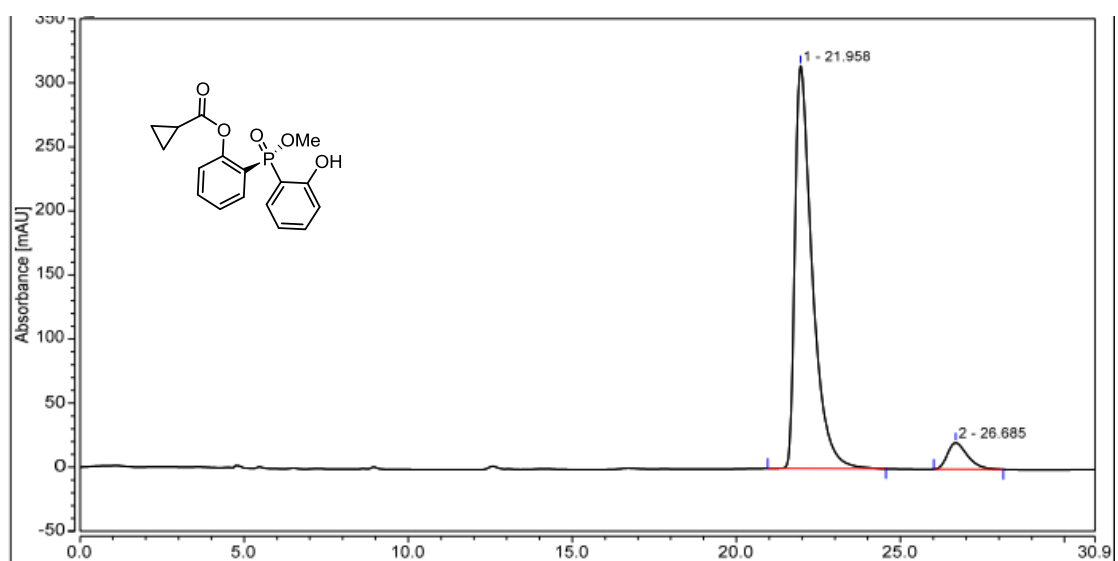

| Peak          | Retention Time min | Area mAU*min   | Height mAU     | Area %        | Height %      |
|---------------|--------------------|----------------|----------------|---------------|---------------|
| 1             | 21.958             | 192.571        | 314.305        | 92.86         | 93.83         |
| 2             | 26.685             | 14.801         | 20.661         | 7.14          | 6.17          |
| <b>Total:</b> |                    | <b>207.371</b> | <b>334.965</b> | <b>100.00</b> | <b>100.00</b> |

## HPLC spectra of 3ah

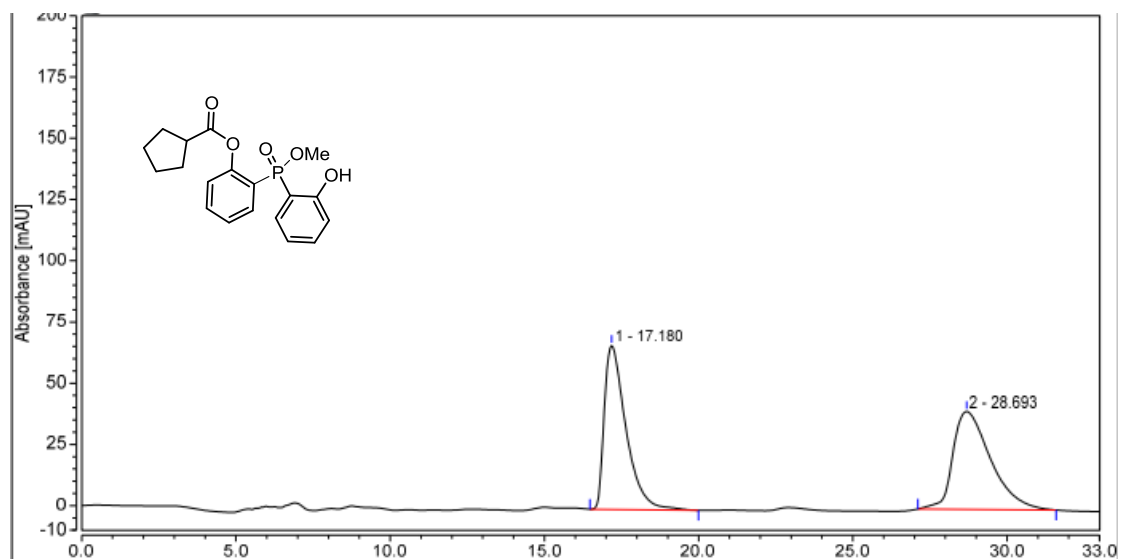

| Peak          | Retention Time min | Area mAU*min   | Height mAU     | Area %        | Height %      |
|---------------|--------------------|----------------|----------------|---------------|---------------|
| 1             | 17.180             | 54.614         | 66.925         | 49.01         | 62.62         |
| 2             | 28.693             | 56.817         | 39.955         | 50.99         | 37.38         |
| <b>Total:</b> |                    | <b>111.431</b> | <b>106.880</b> | <b>100.00</b> | <b>100.00</b> |

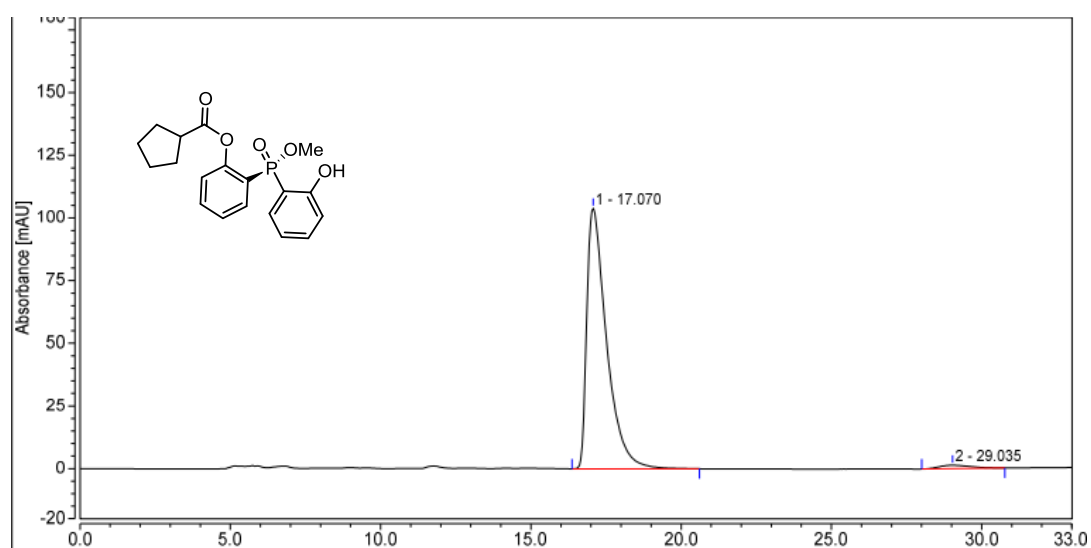

| Peak          | Retention time min | Area mAU*min  | Height mAU     | Area %        | Height %      |
|---------------|--------------------|---------------|----------------|---------------|---------------|
| 1             | 17.070             | 79.264        | 103.969        | 97.91         | 98.70         |
| 2             | 29.035             | 1.690         | 1.371          | 2.09          | 1.30          |
| <b>Total:</b> |                    | <b>80.955</b> | <b>105.340</b> | <b>100.00</b> | <b>100.00</b> |

## HPLC spectra of 3ai

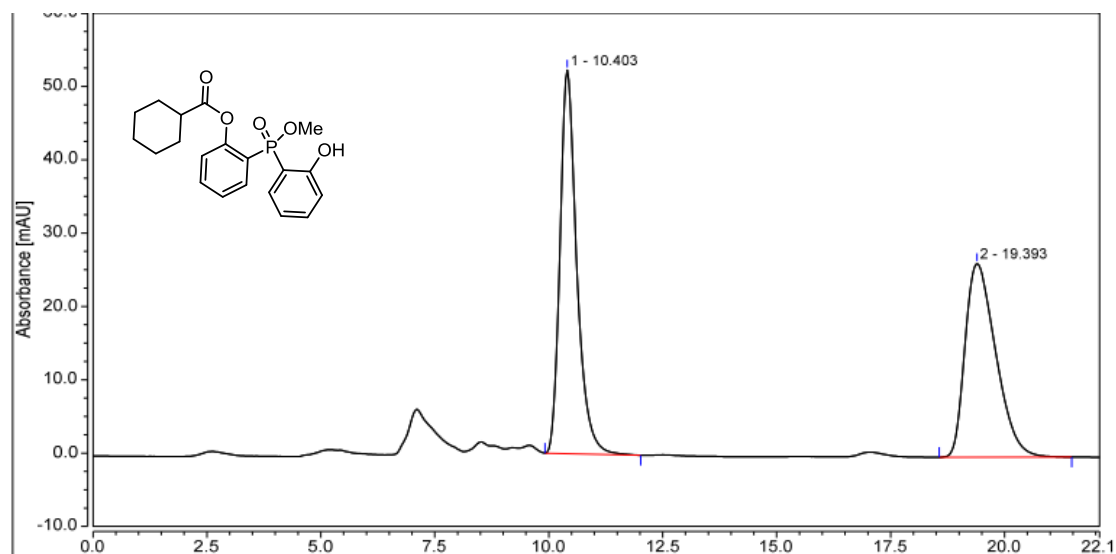

| Peak          | Retention min | Area mAU*min  | Height mAU    | Area %        | Height %      |
|---------------|---------------|---------------|---------------|---------------|---------------|
| 1             | 10.403        | 22.273        | 52.279        | 51.93         | 66.46         |
| 2             | 19.393        | 20.621        | 26.389        | 48.07         | 33.54         |
| <b>Total:</b> |               | <b>42.894</b> | <b>78.669</b> | <b>100.00</b> | <b>100.00</b> |

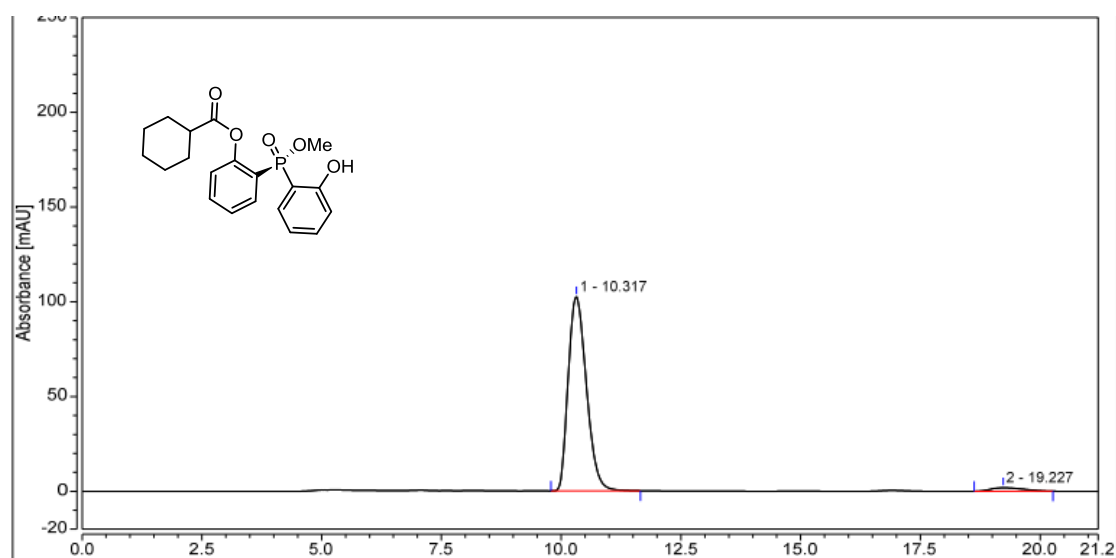

| Peak          | Retention min | Area mAU*min  | Height mAU     | Area %        | Height %      |
|---------------|---------------|---------------|----------------|---------------|---------------|
| 1             | 10.317        | 45.254        | 102.499        | 96.87         | 98.24         |
| 2             | 19.227        | 1.463         | 1.837          | 3.13          | 1.76          |
| <b>Total:</b> |               | <b>46.717</b> | <b>104.336</b> | <b>100.00</b> | <b>100.00</b> |

## HPLC spectra of 3aj

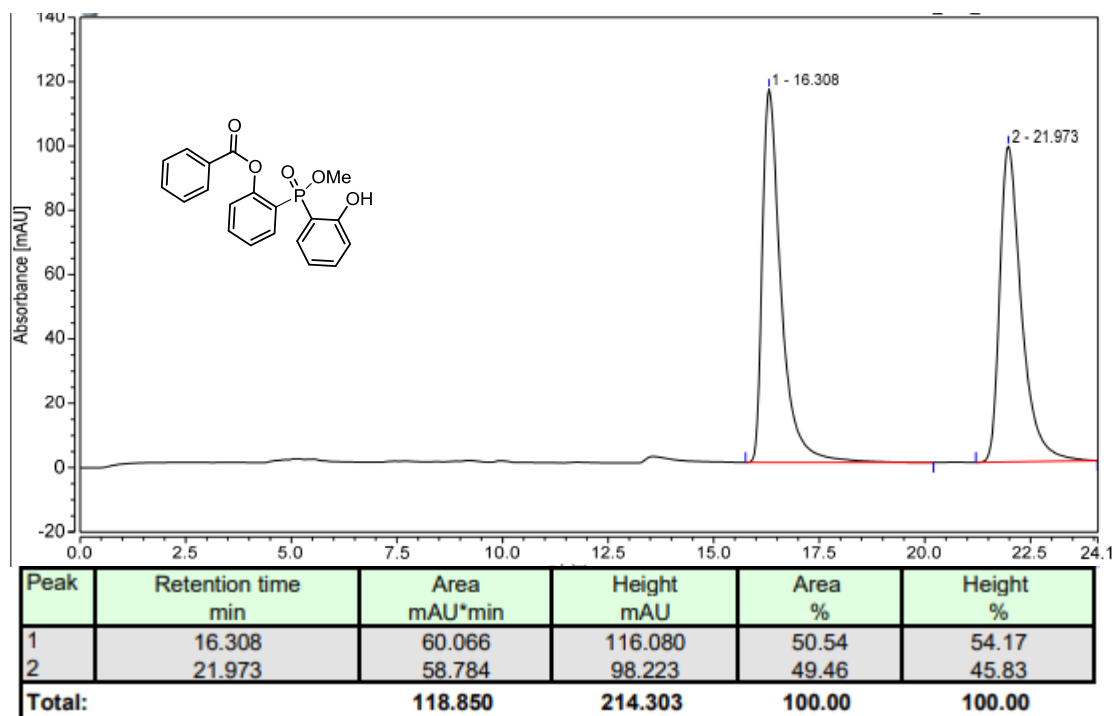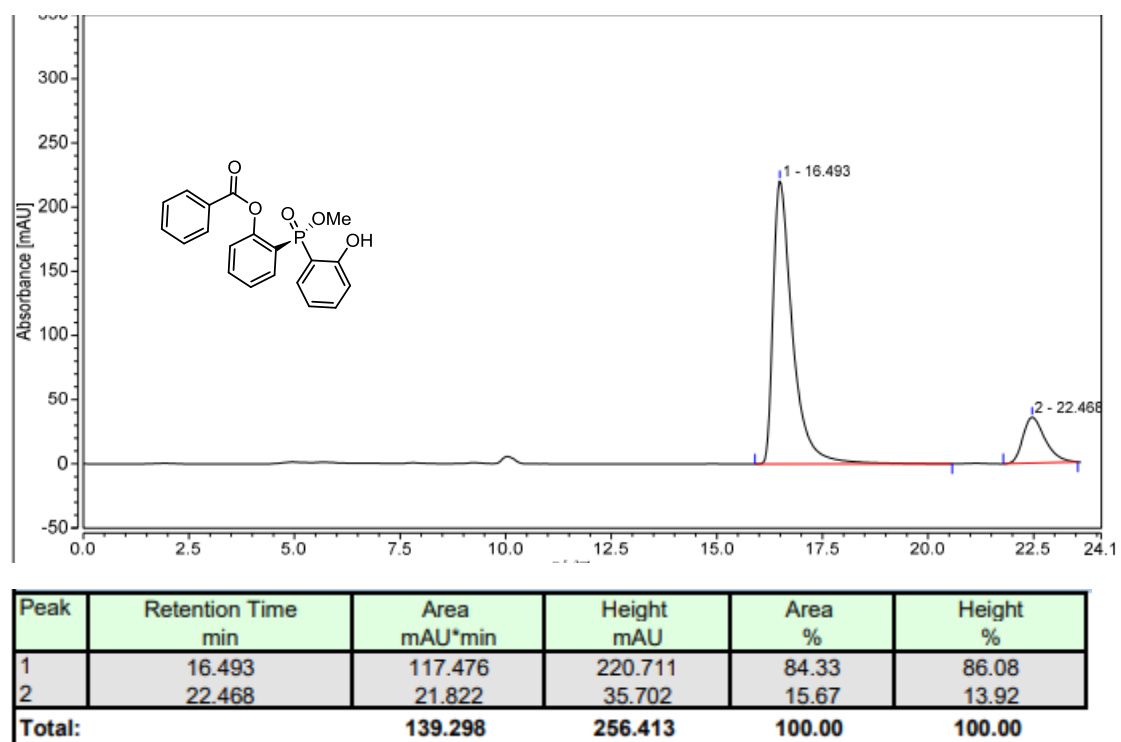

## HPLC spectra of 3ak

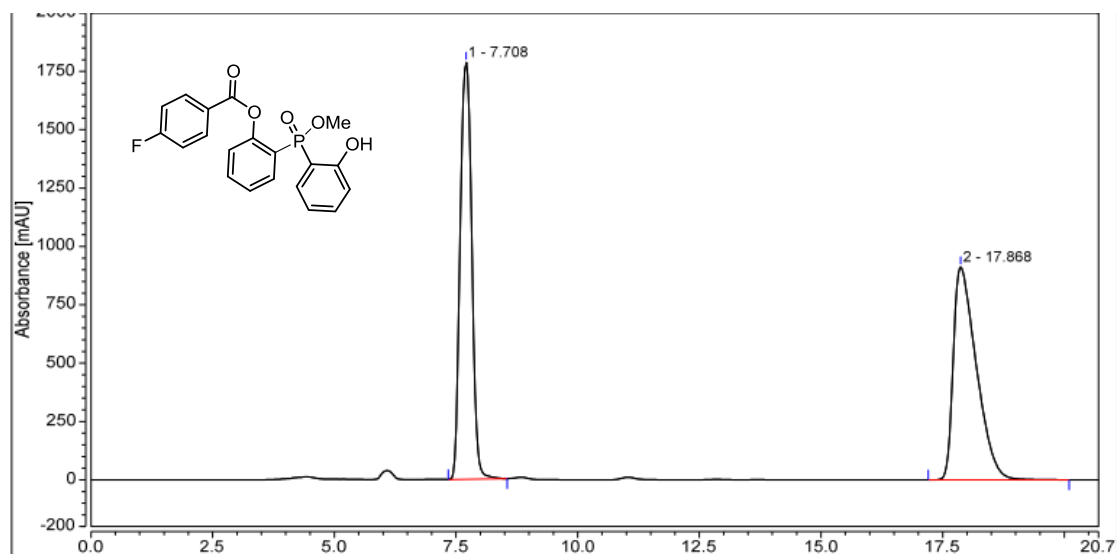

| Peak          | Retention Time<br>min | Area<br>mAU*min | Height<br>mAU   | Area<br>%     | Height<br>%   |
|---------------|-----------------------|-----------------|-----------------|---------------|---------------|
| 1             | 7.708                 | 492.807         | 1786.569        | 49.59         | 66.17         |
| 2             | 17.868                | 500.875         | 913.493         | 50.41         | 33.83         |
| <b>Total:</b> |                       | <b>993.682</b>  | <b>2700.062</b> | <b>100.00</b> | <b>100.00</b> |

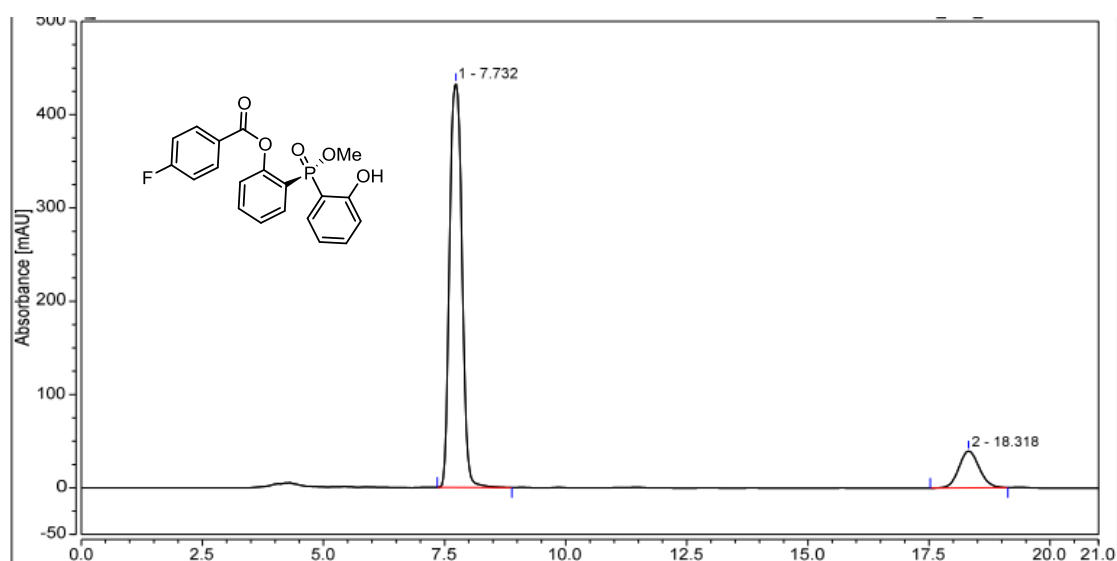

| Peak          | Retention Time<br>min | Area<br>mAU*min | Height<br>mAU  | Area<br>%     | Height<br>%   |
|---------------|-----------------------|-----------------|----------------|---------------|---------------|
| 1             | 7.732                 | 127.936         | 433.119        | 86.98         | 91.67         |
| 2             | 18.318                | 19.158          | 39.348         | 13.02         | 8.33          |
| <b>Total:</b> |                       | <b>147.094</b>  | <b>472.467</b> | <b>100.00</b> | <b>100.00</b> |

## HPLC spectra of 3al

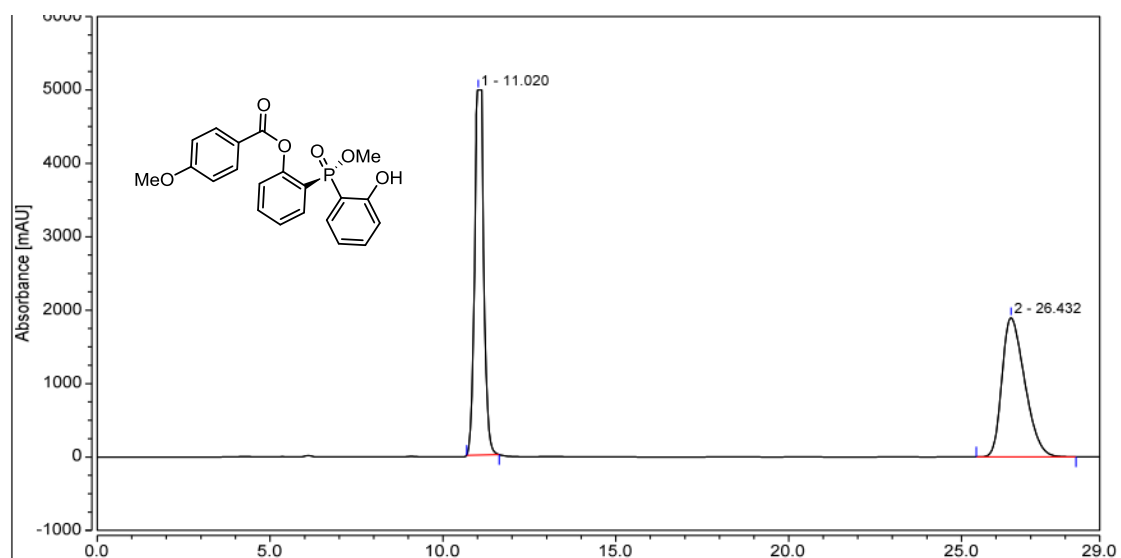

| Peak          | Retention Time<br>min | Area<br>mAU*min | Height<br>mAU   | Area<br>%     | Height<br>%   |
|---------------|-----------------------|-----------------|-----------------|---------------|---------------|
| 1             | 11.020                | 1520.027        | 4974.117        | 51.15         | 72.40         |
| 2             | 26.432                | 1451.738        | 1896.628        | 48.85         | 27.60         |
| <b>Total:</b> |                       | <b>2971.765</b> | <b>6870.745</b> | <b>100.00</b> | <b>100.00</b> |

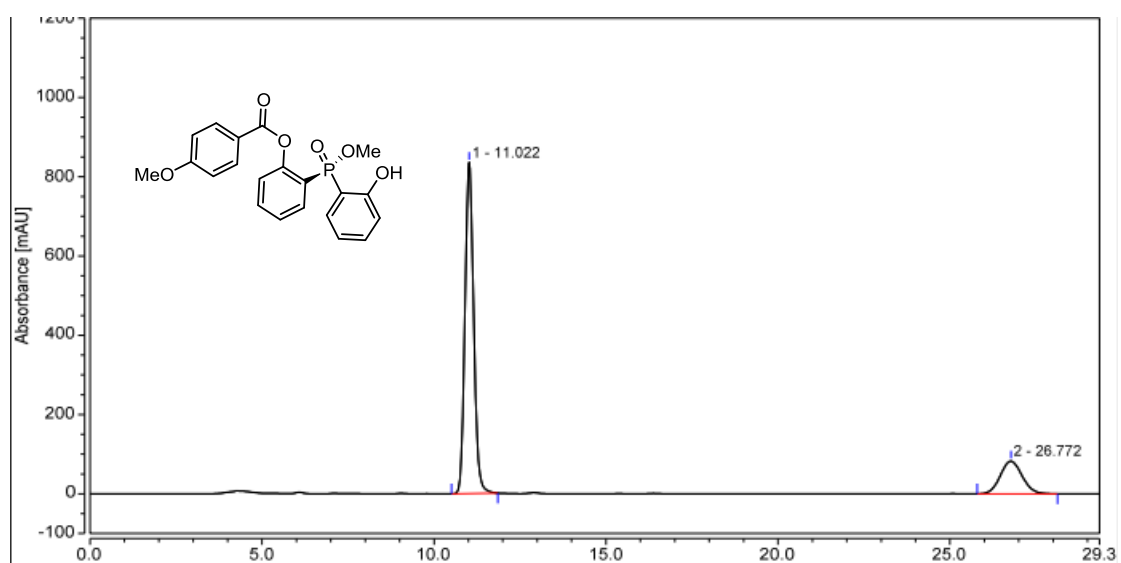

| Peak          | Retention Time<br>min | Area<br>mAU*min | Height<br>mAU  | Area<br>%     | Height<br>%   |
|---------------|-----------------------|-----------------|----------------|---------------|---------------|
| 1             | 11.022                | 245.076         | 835.225        | 80.05         | 90.99         |
| 2             | 26.772                | 61.070          | 82.692         | 19.95         | 9.01          |
| <b>Total:</b> |                       | <b>306.146</b>  | <b>917.917</b> | <b>100.00</b> | <b>100.00</b> |

## HPLC spectra of 3am

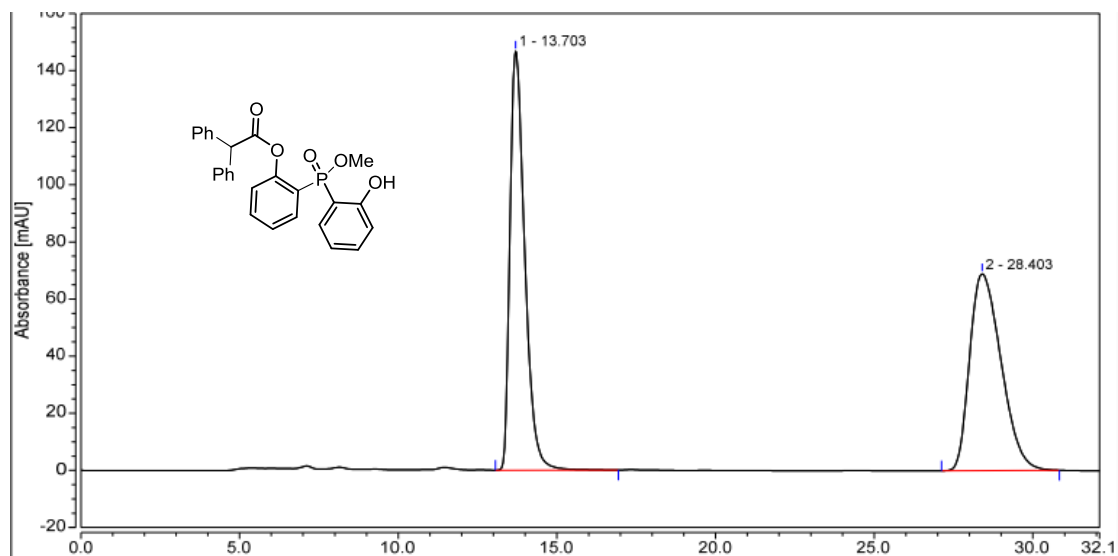

| Peak          | Retention min | Area mAU*min   | Height mAU     | Area %        | Height %      |
|---------------|---------------|----------------|----------------|---------------|---------------|
| 1             | 13.703        | 79.472         | 146.759        | 50.11         | 68.05         |
| 2             | 28.403        | 79.132         | 68.900         | 49.89         | 31.95         |
| <b>Total:</b> |               | <b>158.604</b> | <b>215.659</b> | <b>100.00</b> | <b>100.00</b> |

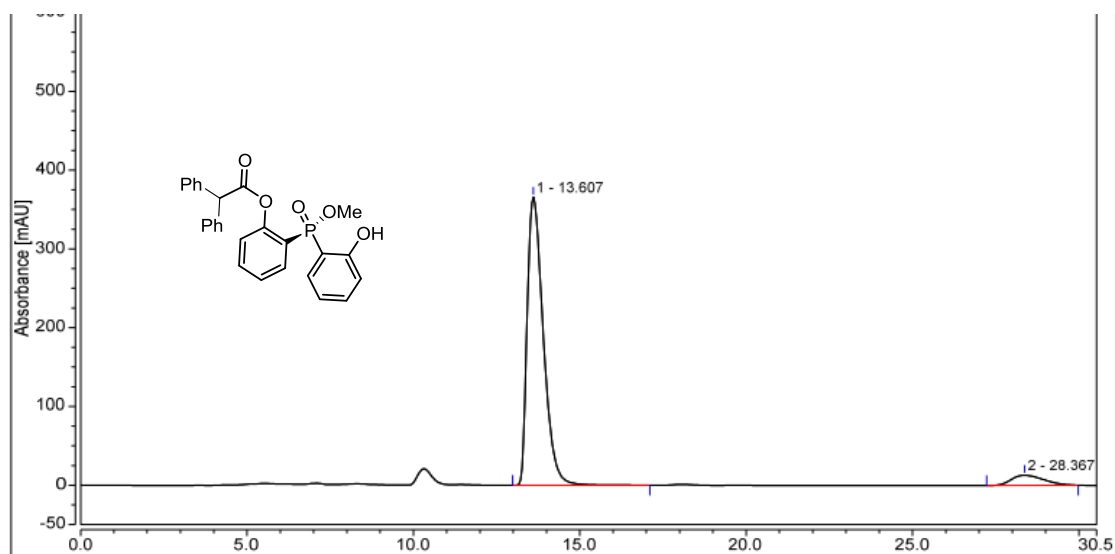

| Peak          | Retention min | Area mAU*min   | Height mAU     | Area %        | Height %      |
|---------------|---------------|----------------|----------------|---------------|---------------|
| 1             | 13.607        | 204.549        | 365.631        | 93.42         | 96.60         |
| 2             | 28.367        | 14.397         | 12.863         | 6.58          | 3.40          |
| <b>Total:</b> |               | <b>218.946</b> | <b>378.494</b> | <b>100.00</b> | <b>100.00</b> |



## HPLC spectra of 3an

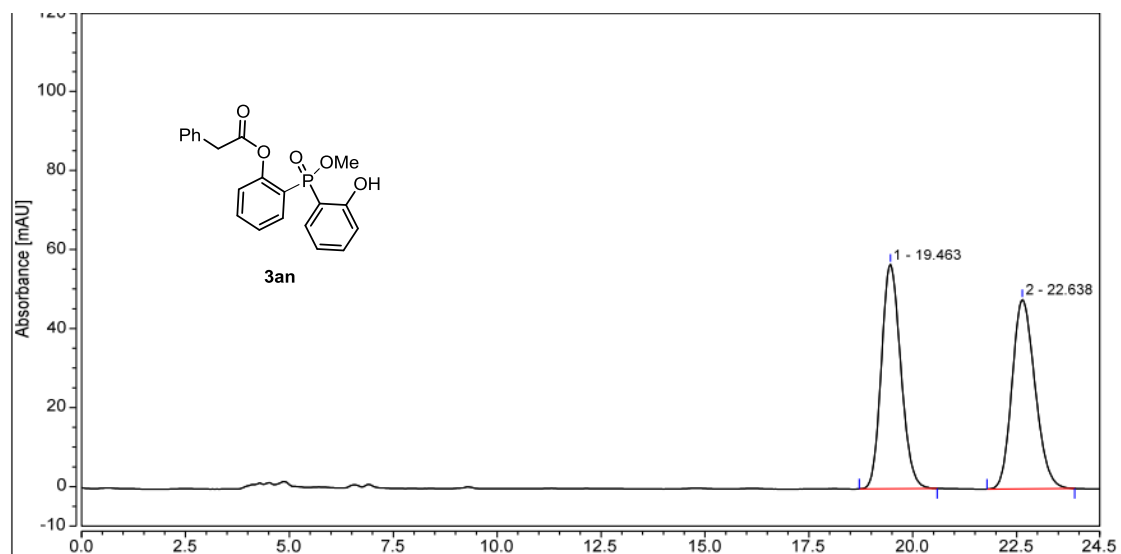

| Peak          | Retention Time<br>min | Area<br>mAU*min | Height<br>mAU  | Area<br>%     | Height<br>%   |
|---------------|-----------------------|-----------------|----------------|---------------|---------------|
| 1             | 19.463                | 30.771          | 56.760         | 49.96         | 54.24         |
| 2             | 22.638                | 30.820          | 47.878         | 50.04         | 45.76         |
| <b>Total:</b> |                       | <b>61.591</b>   | <b>104.638</b> | <b>100.00</b> | <b>100.00</b> |

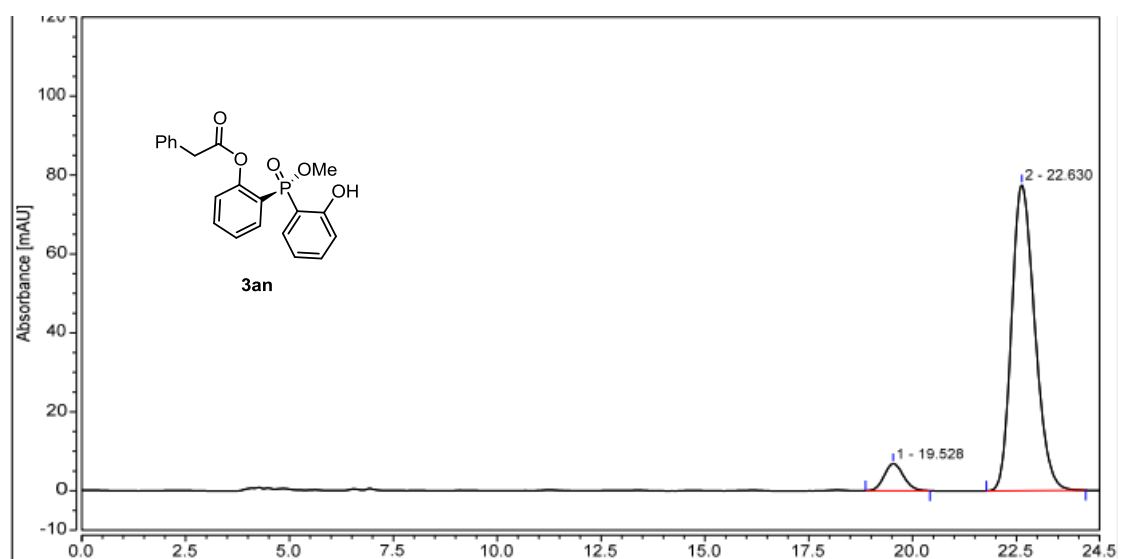

| Peak          | Retention Time<br>min | Area<br>mAU*min | Height<br>mAU | Area<br>%     | Height<br>%   |
|---------------|-----------------------|-----------------|---------------|---------------|---------------|
| 1             | 19.528                | 3.727           | 6.879         | 6.91          | 8.15          |
| 2             | 22.630                | 50.228          | 77.541        | 93.09         | 91.85         |
| <b>Total:</b> |                       | <b>53.955</b>   | <b>84.421</b> | <b>100.00</b> | <b>100.00</b> |

## HPLC spectra of 3ba

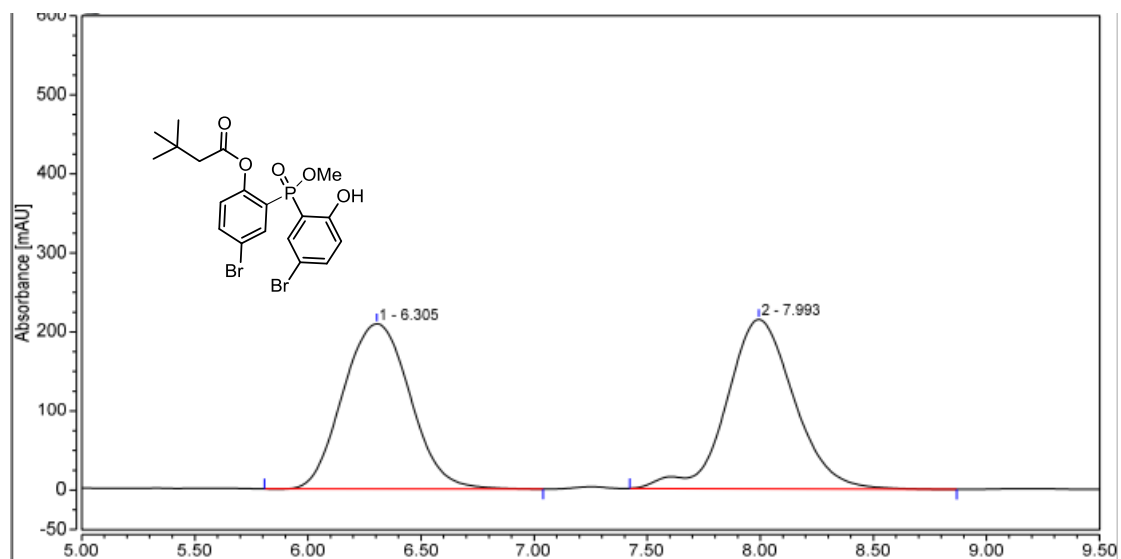

| Peak          | Retention Time<br>min | Area<br>mAU*min | Height<br>mAU  | Area<br>%     | Height<br>%   |
|---------------|-----------------------|-----------------|----------------|---------------|---------------|
| 1             | 6.305                 | 71.892          | 208.872        | 49.25         | 49.38         |
| 2             | 7.993                 | 74.073          | 214.117        | 50.75         | 50.62         |
| <b>Total:</b> |                       | <b>145.965</b>  | <b>422.989</b> | <b>100.00</b> | <b>100.00</b> |

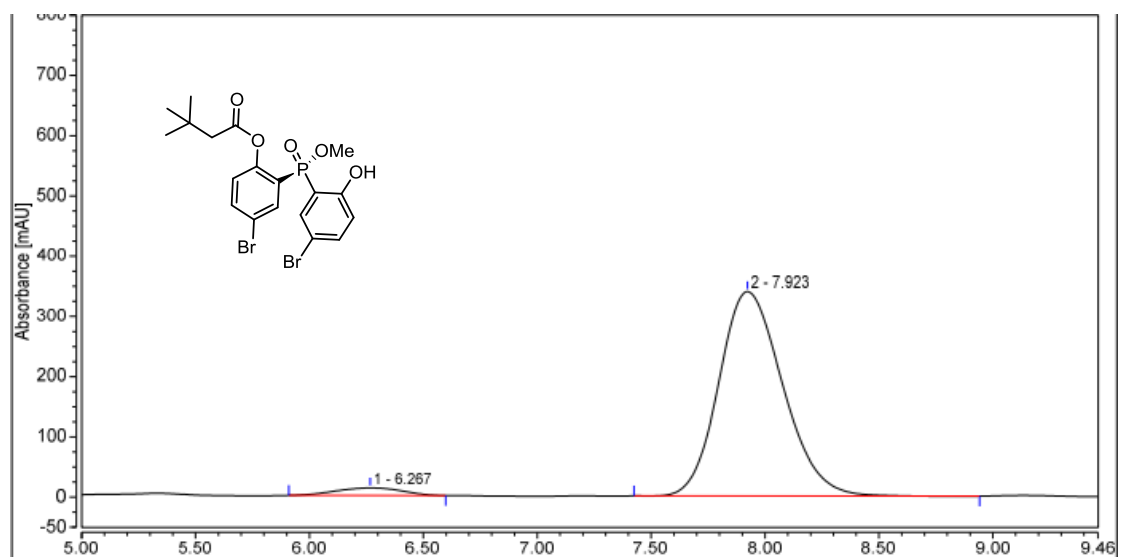

| Peak          | Retention Time<br>min | Area<br>mAU*min | Height<br>mAU  | Area<br>%     | Height<br>%   |
|---------------|-----------------------|-----------------|----------------|---------------|---------------|
| 1             | 6.267                 | 4.190           | 12.489         | 3.66          | 3.55          |
| 2             | 7.923                 | 110.413         | 339.323        | 96.34         | 96.45         |
| <b>Total:</b> |                       | <b>114.603</b>  | <b>351.812</b> | <b>100.00</b> | <b>100.00</b> |

## HPLC spectra of 3ca

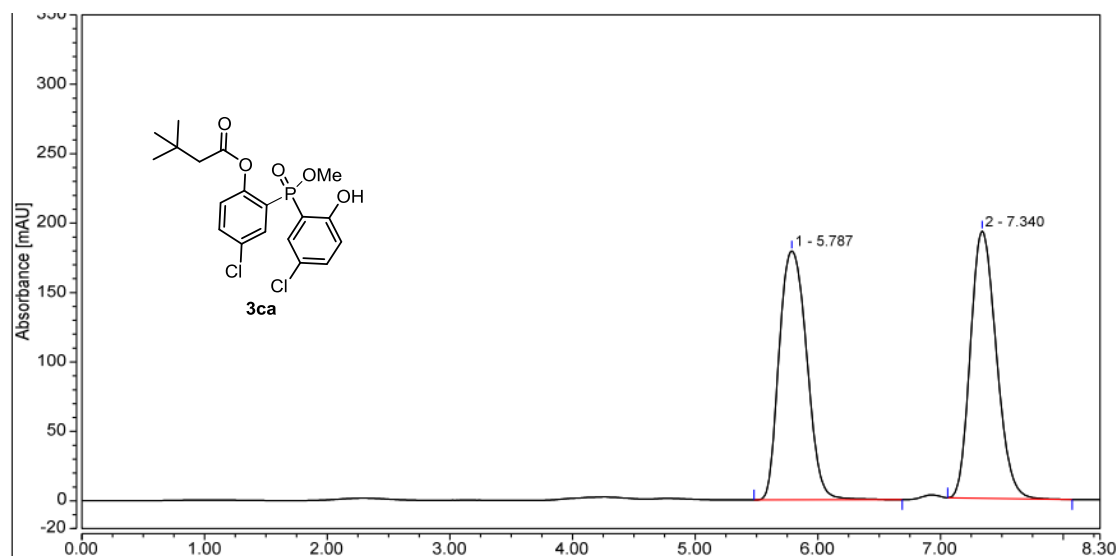

| Peak          | Retention Time<br>min | Area<br>mAU*min | Height<br>mAU  | Area<br>%     | Height<br>%   |
|---------------|-----------------------|-----------------|----------------|---------------|---------------|
| 1             | 5.787                 | 46.835          | 179.347        | 49.89         | 48.25         |
| 2             | 7.340                 | 47.047          | 192.383        | 50.11         | 51.75         |
| <b>Total:</b> |                       | <b>93.882</b>   | <b>371.730</b> | <b>100.00</b> | <b>100.00</b> |

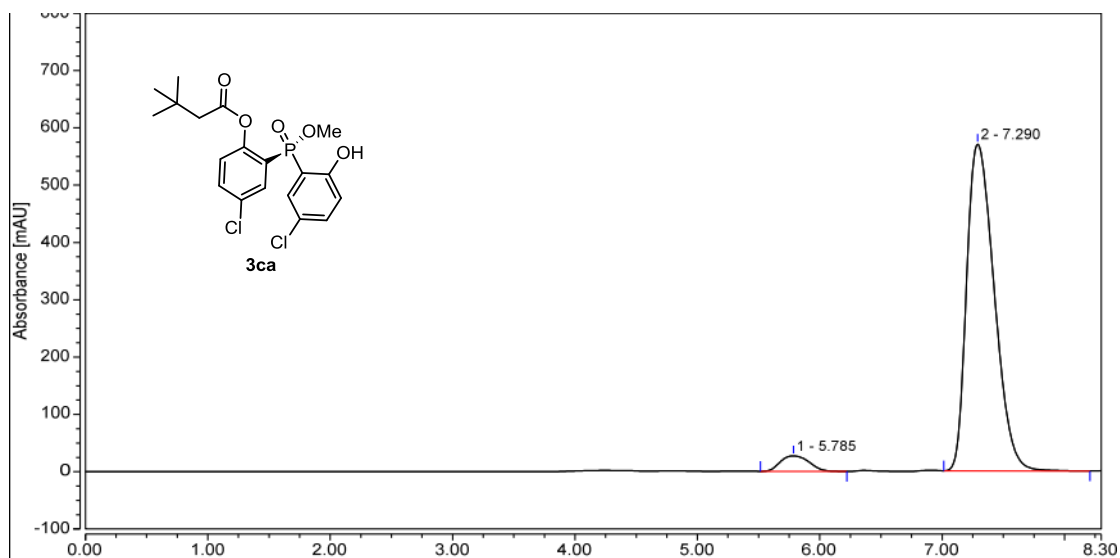

| Peak          | Retention Time<br>min | Area<br>mAU*min | Height<br>mAU  | Area<br>%     | Height<br>%   |
|---------------|-----------------------|-----------------|----------------|---------------|---------------|
| 1             | 5.785                 | 7.315           | 26.823         | 4.68          | 4.49          |
| 2             | 7.290                 | 148.978         | 570.087        | 95.32         | 95.51         |
| <b>Total:</b> |                       | <b>156.293</b>  | <b>596.909</b> | <b>100.00</b> | <b>100.00</b> |

## HPLC spectra of 3da

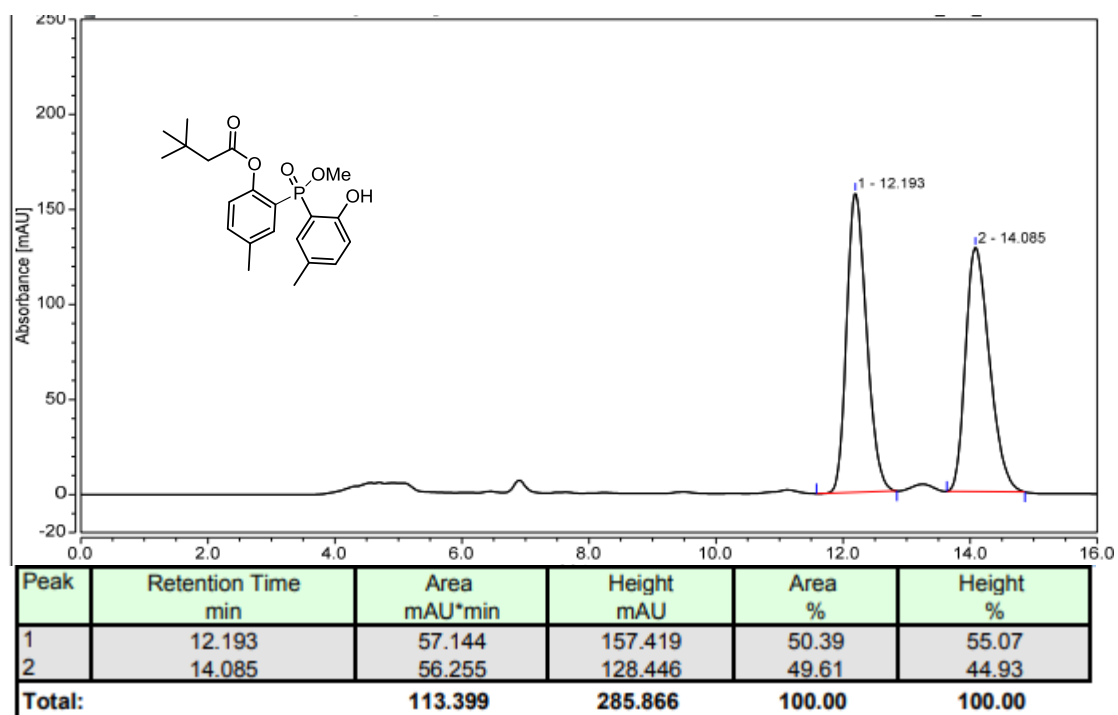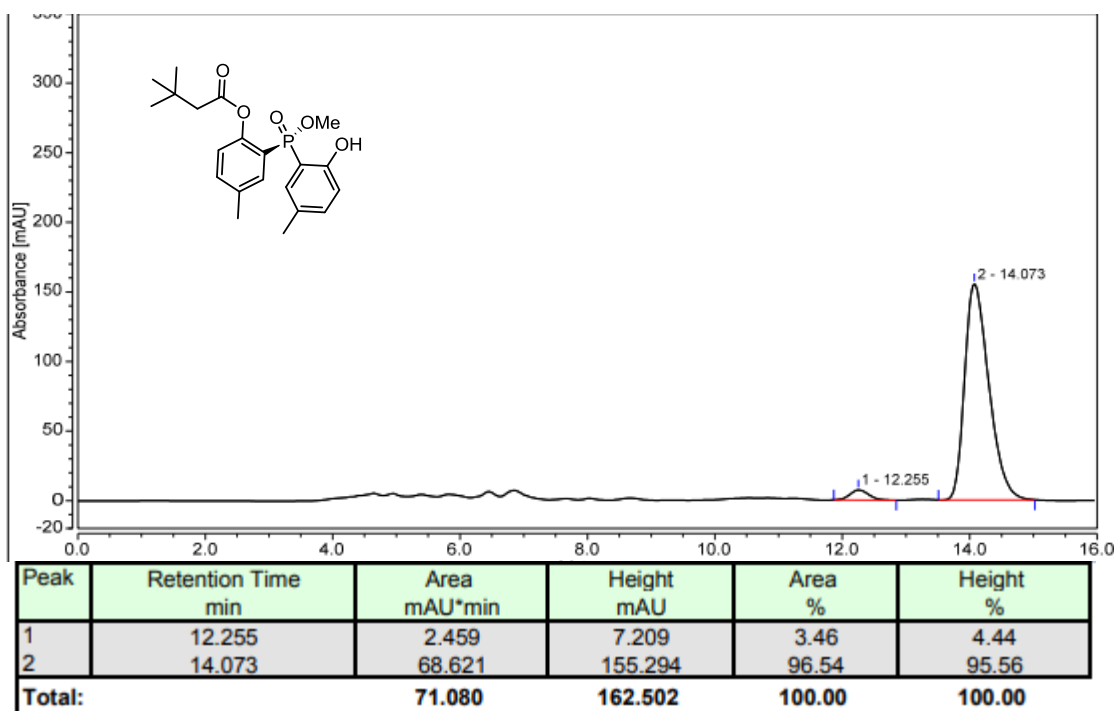

## HPLC spectra of 3ea

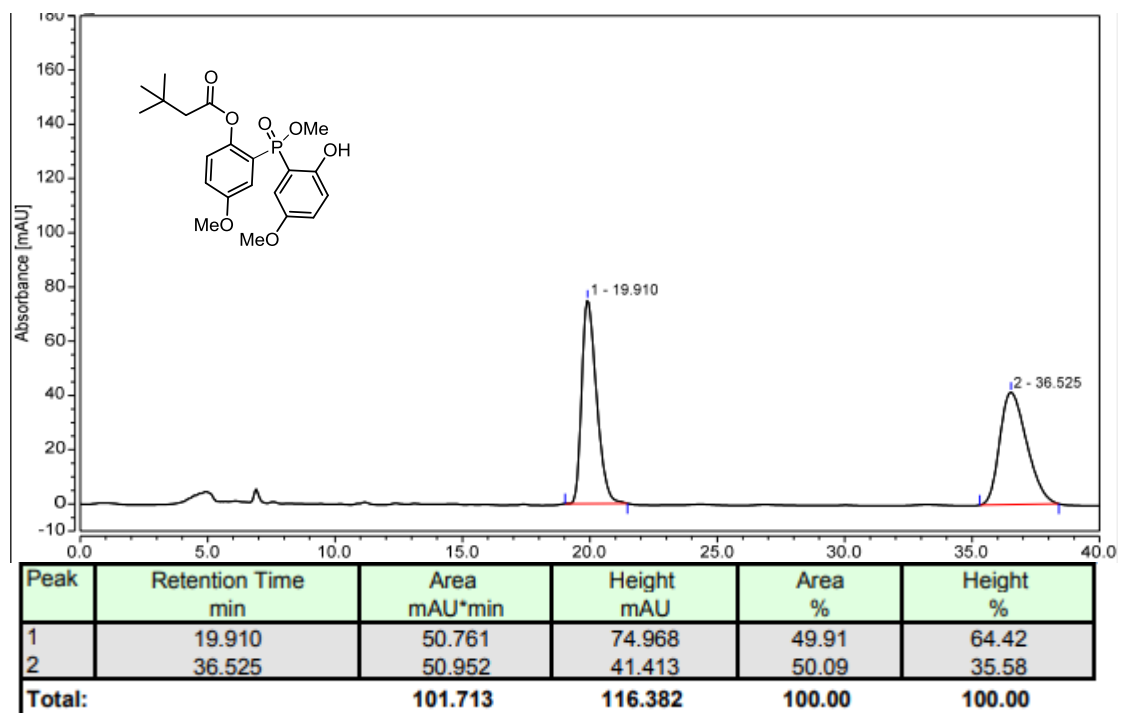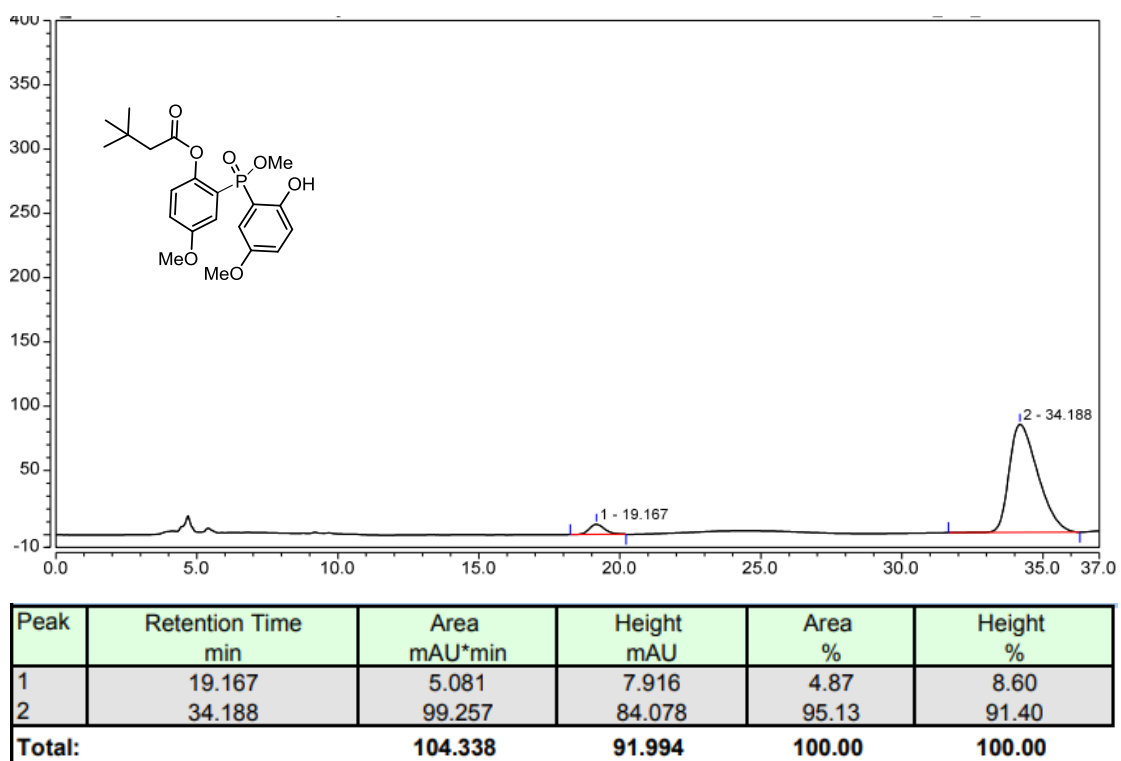

## HPLC spectra of 3fa

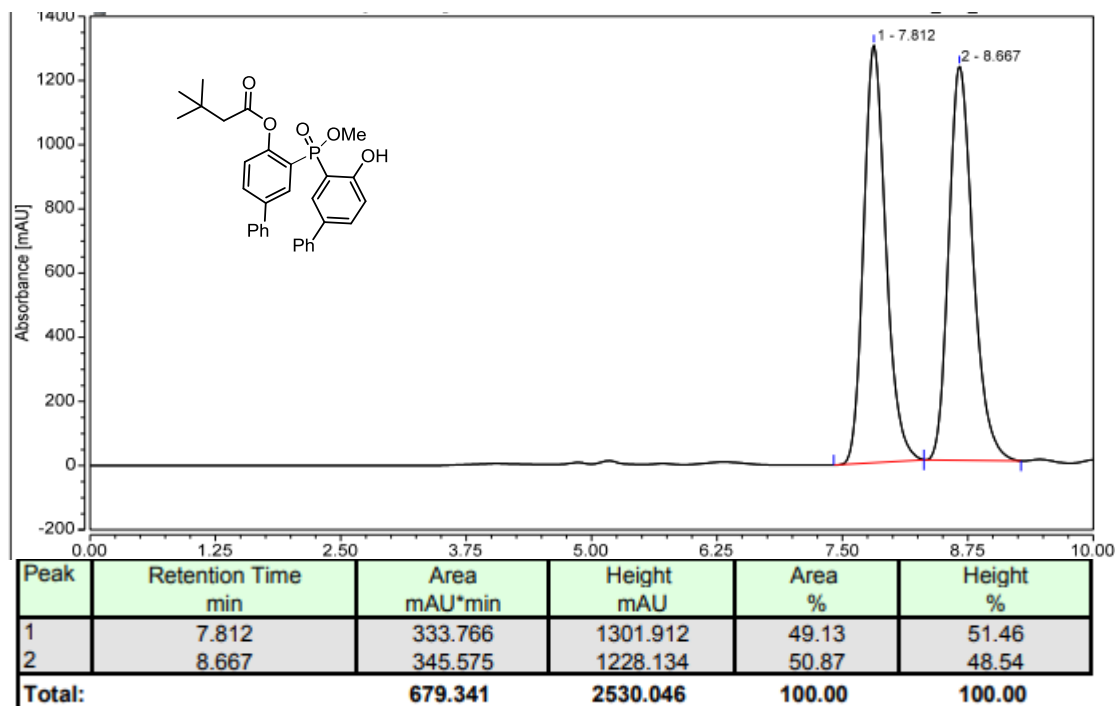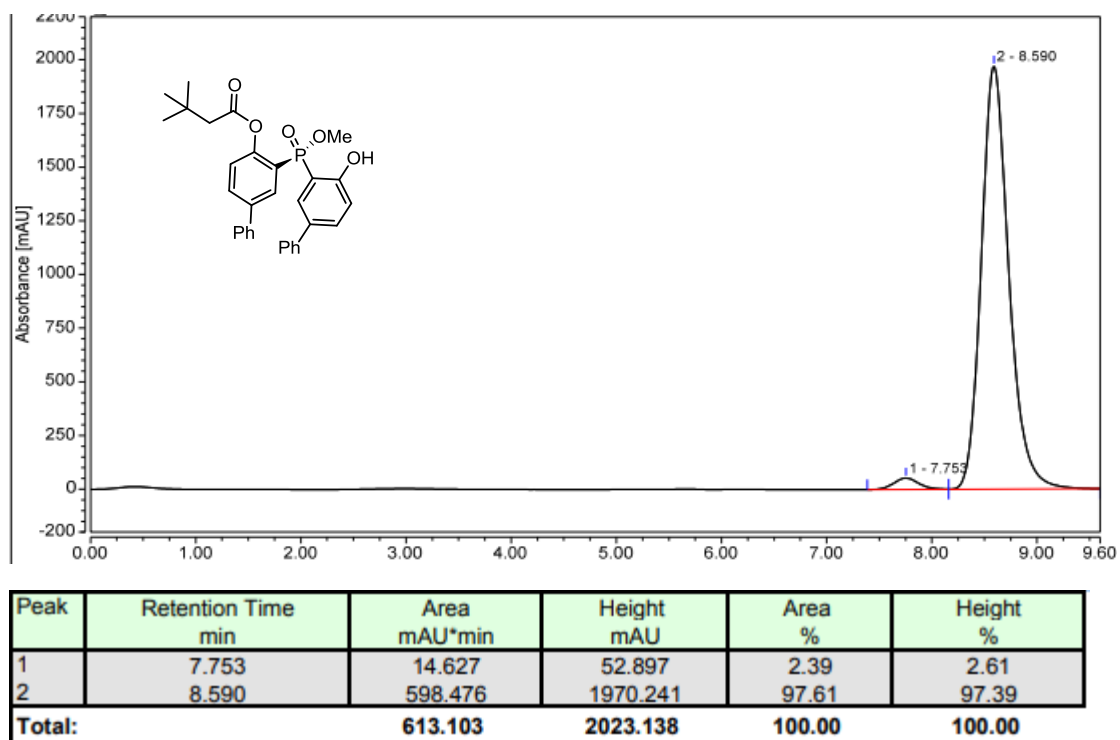

## HPLC spectra of 3ga

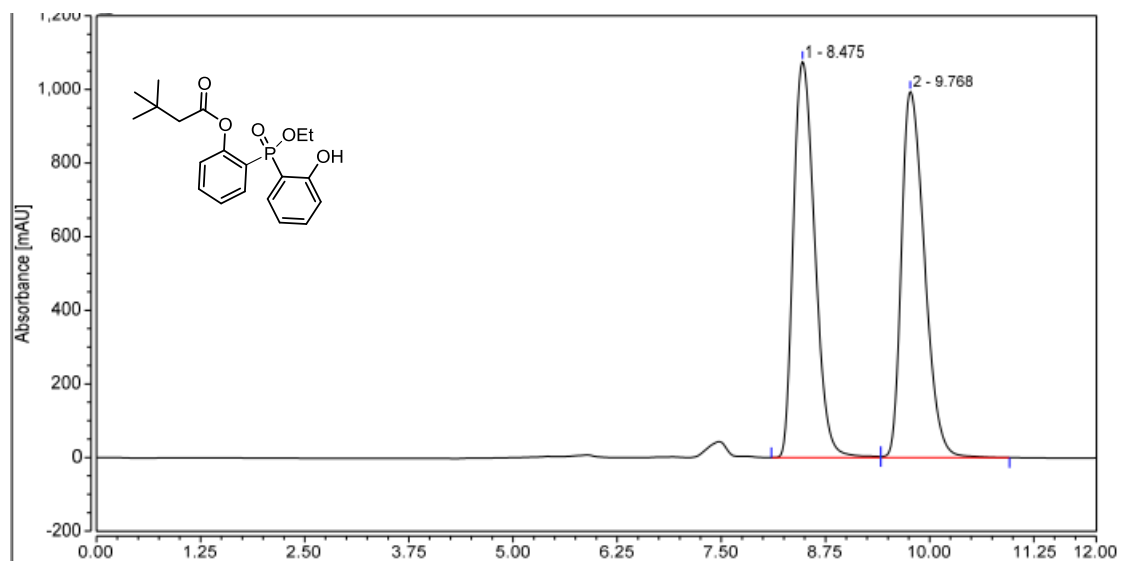

| Peak          | Retention time<br>min | Area<br>mAU*min | Height<br>mAU   | Area<br>%     | Height<br>%   |
|---------------|-----------------------|-----------------|-----------------|---------------|---------------|
| 1             | 8.475                 | 320.181         | 1076.675        | 50.14         | 51.96         |
| 2             | 9.768                 | 318.370         | 995.472         | 49.86         | 48.04         |
| <b>Total:</b> |                       | <b>638.552</b>  | <b>2072.147</b> | <b>100.00</b> | <b>100.00</b> |

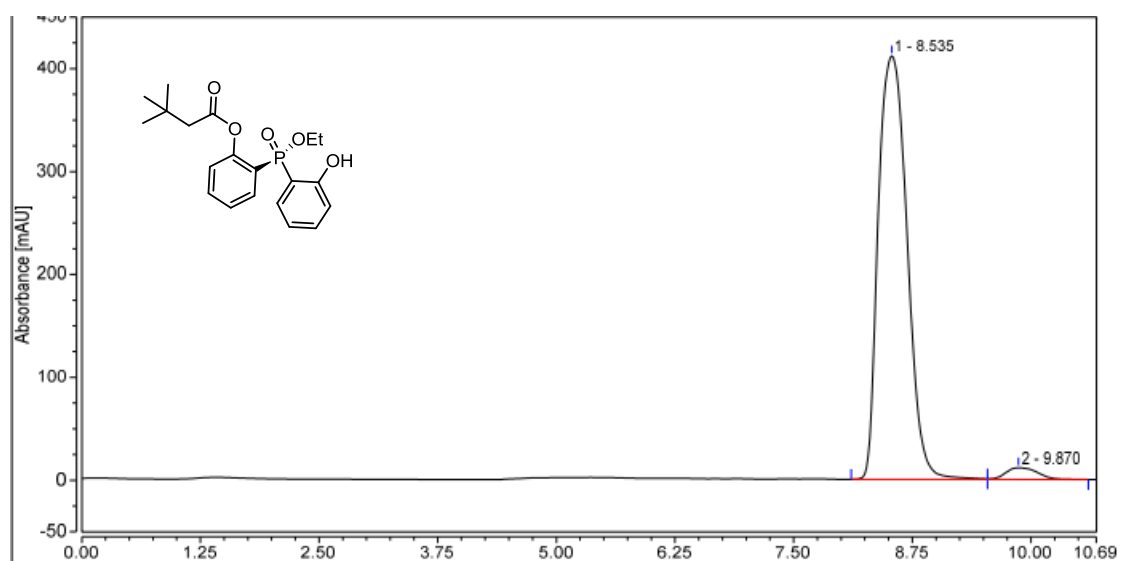

| Peak          | Retention time<br>min | Area<br>mAU*min | Height<br>mAU  | Area<br>%     | Height<br>%   |
|---------------|-----------------------|-----------------|----------------|---------------|---------------|
| 1             | 8.535                 | 144.459         | 411.427        | 97.02         | 97.32         |
| 2             | 9.870                 | 4.444           | 11.347         | 2.98          | 2.68          |
| <b>Total:</b> |                       | <b>148.903</b>  | <b>422.774</b> | <b>100.00</b> | <b>100.00</b> |

## HPLC spectra of 3ha

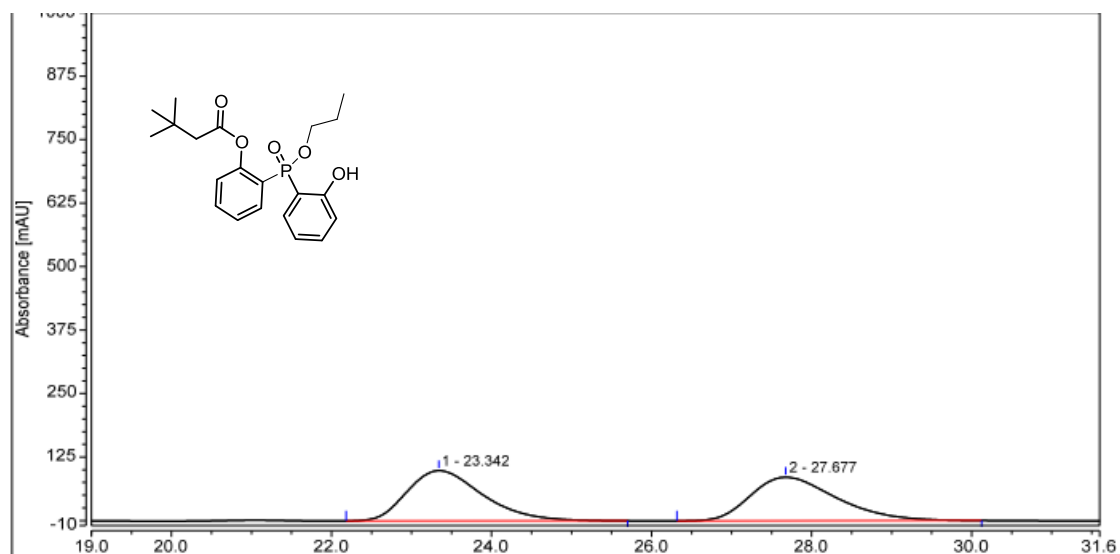

| Peak          | Retention Time min | Area mAU*min   | Height mAU     | Area %        | Height %      |
|---------------|--------------------|----------------|----------------|---------------|---------------|
| 1             | 23.342             | 108.940        | 99.031         | 50.22         | 53.56         |
| 2             | 27.677             | 107.975        | 85.865         | 49.78         | 46.44         |
| <b>Total:</b> |                    | <b>216.915</b> | <b>184.896</b> | <b>100.00</b> | <b>100.00</b> |

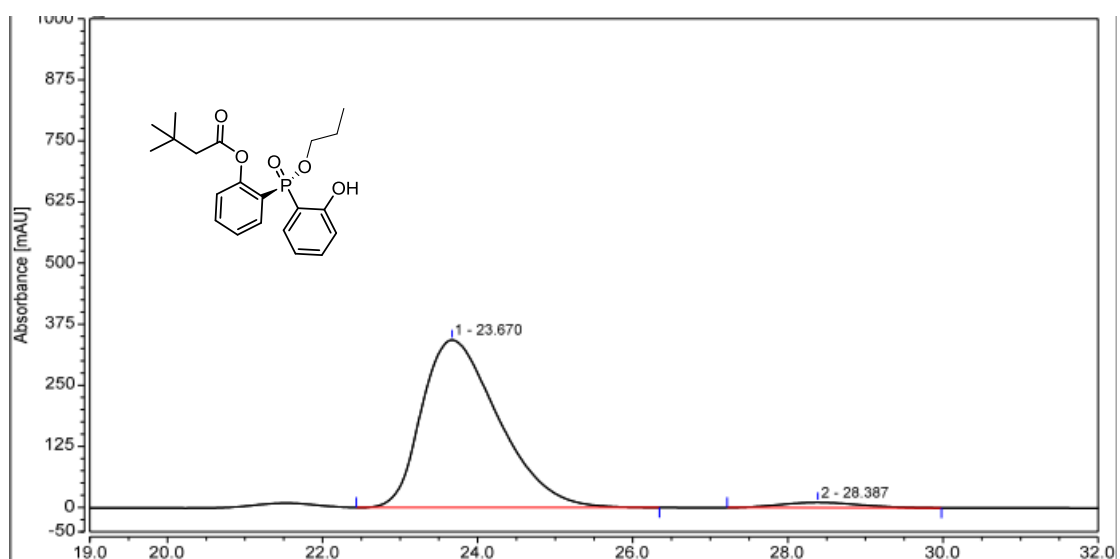

| Peak          | Retention Time min | Area mAU*min   | Height mAU     | Area %        | Height %      |
|---------------|--------------------|----------------|----------------|---------------|---------------|
| 1             | 23.670             | 393.133        | 342.589        | 96.80         | 96.94         |
| 2             | 28.387             | 12.993         | 10.831         | 3.20          | 3.06          |
| <b>Total:</b> |                    | <b>406.125</b> | <b>353.421</b> | <b>100.00</b> | <b>100.00</b> |



## HPLC spectra of 3ia

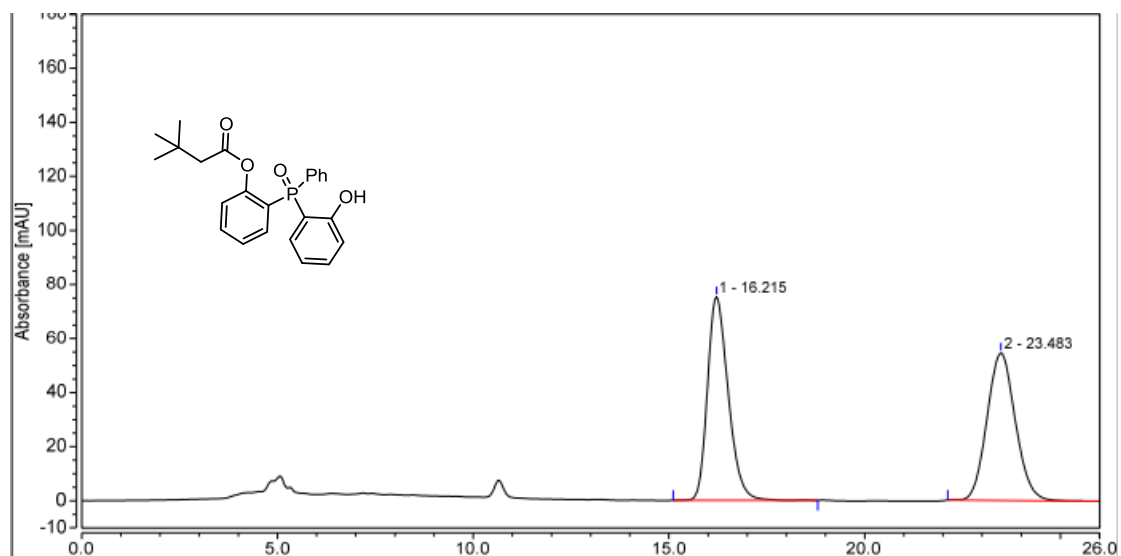

| Peak          | Retention Time min | Area mAU*min  | Height mAU     | Area %        | Height %      |
|---------------|--------------------|---------------|----------------|---------------|---------------|
| 1             | 16.215             | 46.191        | 75.280         | 50.18         | 57.98         |
| 2             | 23.483             | 45.858        | 54.553         | 49.82         | 42.02         |
| <b>Total:</b> |                    | <b>92.049</b> | <b>129.833</b> | <b>100.00</b> | <b>100.00</b> |

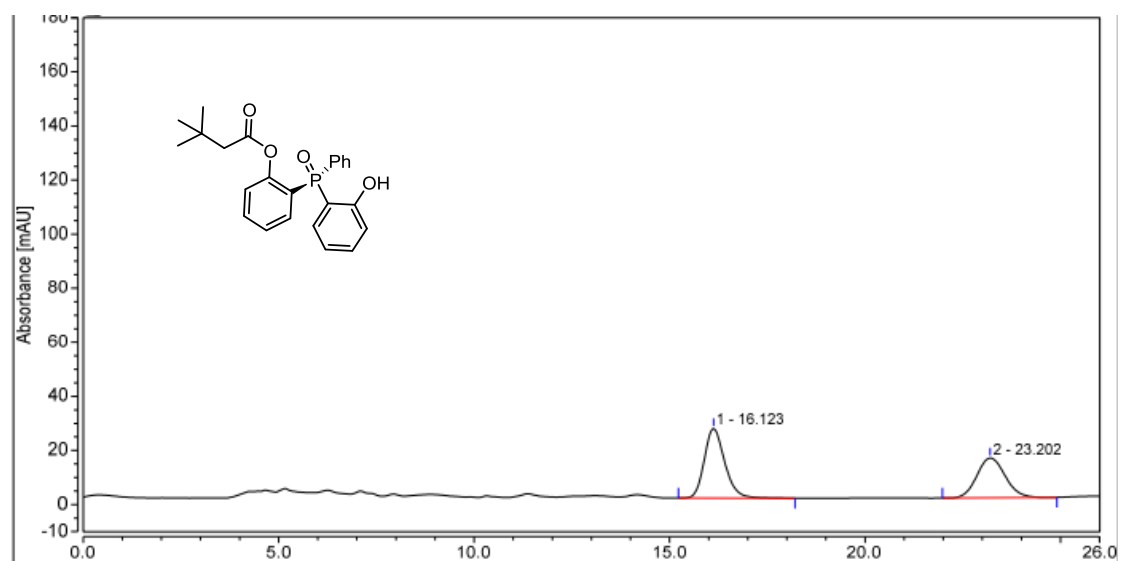

| Peak          | Retention Time min | Area mAU*min  | Height mAU    | Area %        | Height %      |
|---------------|--------------------|---------------|---------------|---------------|---------------|
| 1             | 16.123             | 15.587        | 25.708        | 55.90         | 63.67         |
| 2             | 23.202             | 12.296        | 14.667        | 44.10         | 36.33         |
| <b>Total:</b> |                    | <b>27.882</b> | <b>40.374</b> | <b>100.00</b> | <b>100.00</b> |

## HPLC spectra of 3ao

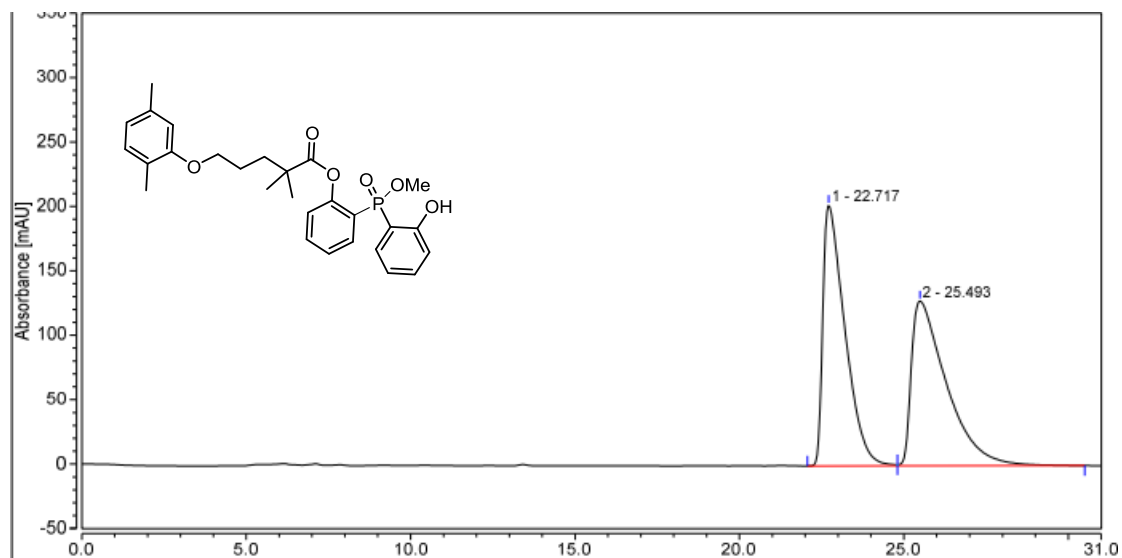

| Peak          | Retention Time min | Area mAU*min   | Height mAU     | Area %        | Height %      |
|---------------|--------------------|----------------|----------------|---------------|---------------|
| 1             | 22.717             | 157.199        | 202.185        | 49.86         | 61.25         |
| 2             | 25.493             | 158.083        | 127.888        | 50.14         | 38.75         |
| <b>Total:</b> |                    | <b>315.282</b> | <b>330.073</b> | <b>100.00</b> | <b>100.00</b> |

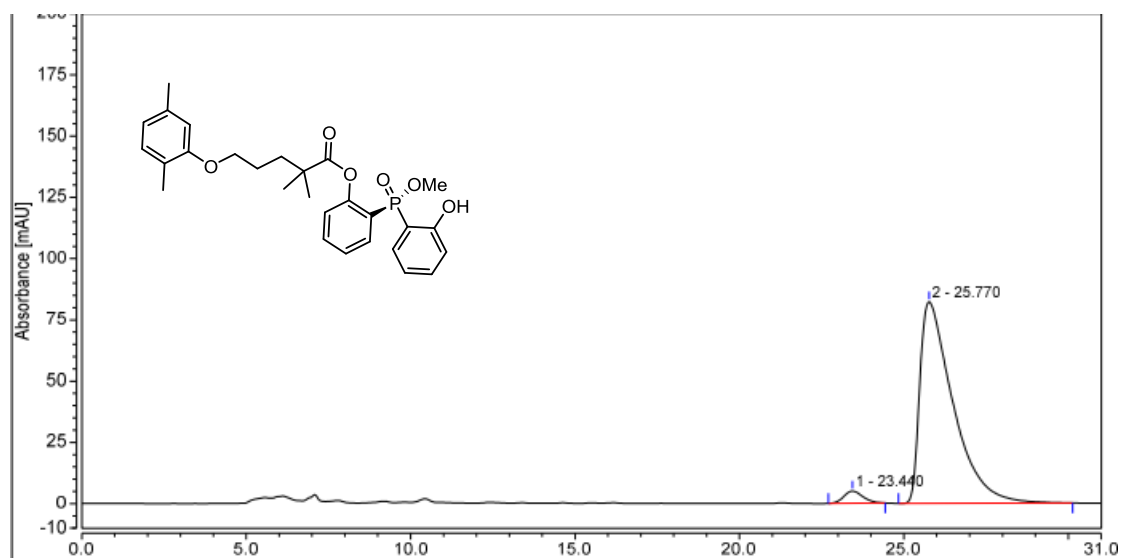

| Peak          | Retention Time min | Area mAU*min  | Height mAU    | Area %        | Height %      |
|---------------|--------------------|---------------|---------------|---------------|---------------|
| 1             | 23.440             | 3.357         | 4.992         | 3.37          | 5.72          |
| 2             | 25.770             | 96.243        | 82.279        | 96.63         | 94.28         |
| <b>Total:</b> |                    | <b>99.599</b> | <b>87.271</b> | <b>100.00</b> | <b>100.00</b> |

## HPLC spectra of 3ap

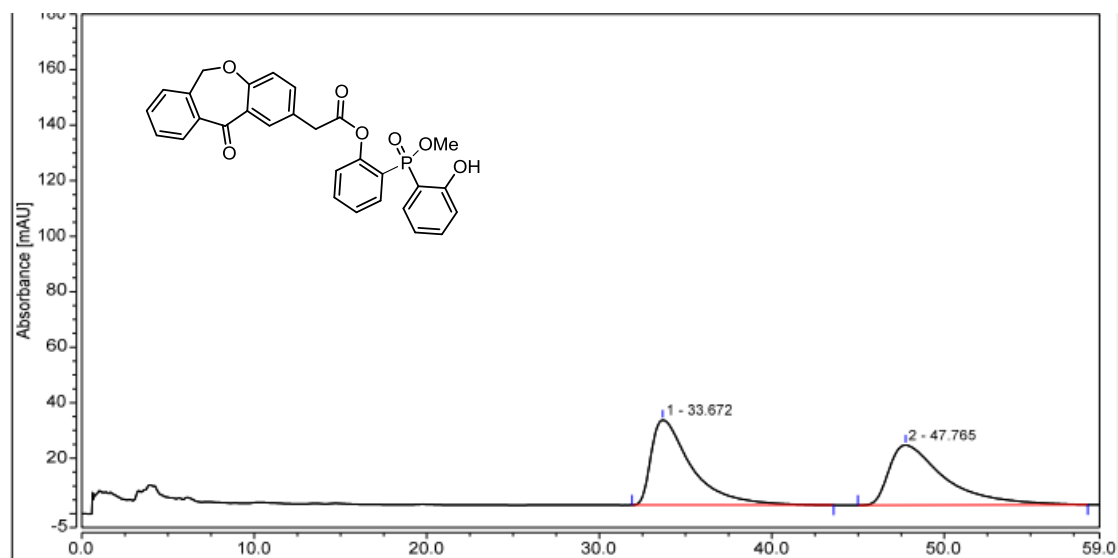

| Peak          | Retention Time min | Area mAU*min   | Height mAU    | Area %        | Height %      |
|---------------|--------------------|----------------|---------------|---------------|---------------|
| 1             | 33.672             | 83.207         | 30.632        | 50.15         | 58.55         |
| 2             | 47.765             | 82.695         | 21.687        | 49.85         | 41.45         |
| <b>Total:</b> |                    | <b>165.902</b> | <b>52.320</b> | <b>100.00</b> | <b>100.00</b> |

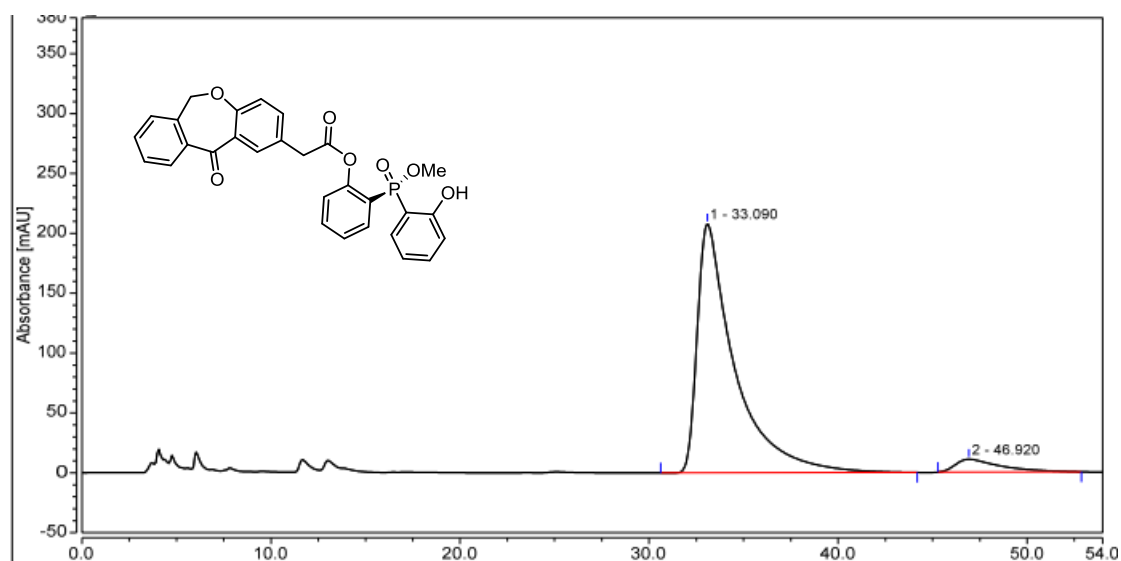

| Peak          | Retention Time min | Area mAU*min   | Height mAU     | Area %        | Height %      |
|---------------|--------------------|----------------|----------------|---------------|---------------|
| 1             | 33.090             | 475.858        | 207.765        | 94.15         | 95.07         |
| 2             | 46.920             | 29.573         | 10.772         | 5.85          | 4.93          |
| <b>Total:</b> |                    | <b>505.431</b> | <b>218.537</b> | <b>100.00</b> | <b>100.00</b> |

## HPLC spectra of 3aq

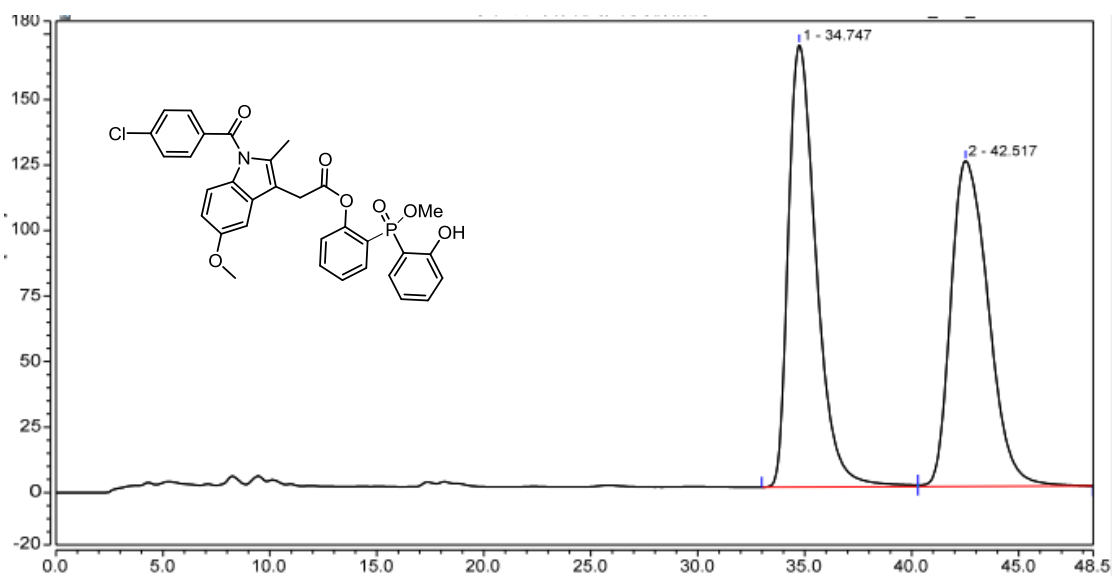

| Peak          | Retention min | Area mAU*min   | Height mAU     | Area %        | Height %      |
|---------------|---------------|----------------|----------------|---------------|---------------|
| 1             | 34.747        | 254.794        | 168.784        | 50.25         | 57.59         |
| 2             | 42.517        | 252.232        | 124.298        | 49.75         | 42.41         |
| <b>Total:</b> |               | <b>507.026</b> | <b>293.082</b> | <b>100.00</b> | <b>100.00</b> |

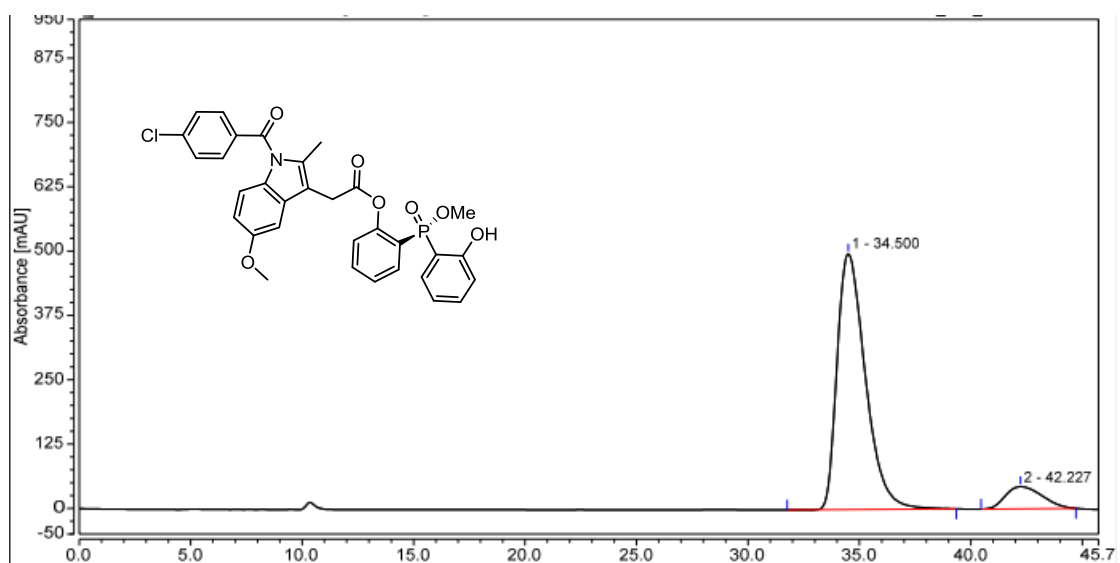

| Peak          | Retention min | Area mAU*min   | Height mAU     | Area %        | Height %      |
|---------------|---------------|----------------|----------------|---------------|---------------|
| 1             | 34.500        | 730.331        | 496.823        | 89.86         | 92.01         |
| 2             | 42.227        | 82.437         | 43.135         | 10.14         | 7.99          |
| <b>Total:</b> |               | <b>812.769</b> | <b>539.958</b> | <b>100.00</b> | <b>100.00</b> |

## Reference

[1] M.-S. Xie, Y.-F. Zhang, M. Shan, X.-X. Wu, G.-R. Qu and H.-M. Guo, Chiral DMAP-*N*-oxides as Acyl Transfer Catalysts: Design, Synthesis, and Application in Asymmetric Steglich Rearrangement, *Angew. Chem., Int. Ed.*, 2019, **58**, 2839-2843.

[2] M.-S. Xie, M. Shan, N. Li, Y.-G. Chen, X.-B. Wang, X. Cheng, Y. Tian, X.-X. Wu, Y. Deng, G.-R. Qu and H.-M. Guo, Chiral 4-Aryl-pyridine-*N*-oxide Nucleophilic Catalysts: Design, Synthesis, and Application in Acylative Dynamic Kinetic Resolution. *ACS Catal.*, 2022, **12**, 877-891.
